# Supplementary material
Source: publisher figshare collection journal article supplement (https://microbiology.figshare.com/articles/dataset/_/17142701)
Supplement: Supplementary file 1 [file 1]

Archive with 2 entries (2 files):
- KBase_derived_annotated.genome.7401_8contigs.xlsx
- Supplementary information_07122021.pdf
