# Supplementary material
Source: publisher figshare collection journal article supplement (https://microbiology.figshare.com/articles/dataset/_/17142701)
Supplement: Supplementary file 1 [file 1 › KBase_derived_annotated.genome.7401_8contigs.xlsx]

## Sheet: KBase_derived_annotated.genome.
LOCUS scaffold00000001 868945 bp DNA UNK 08-APR-2021
DEFINITION 1_length_868945_cov_123.481761.
ACCESSION 1_length_868945_cov_123
VERSION 1_length_868945_cov_123.481761
KEYWORDS .
SOURCE KBase_KBase
ORGANISM Unknown species
Unconfirmed Organism.
COMMENT Renamed contig from 1_length_868945_cov_123.481761 because the
original name exceeded 16 characters
FEATURES Location/Qualifiers
gene 1..684
/product="Sodium/sugar cotransporter"
/translation="GLRGLVVGGLLSALMSSLSSLFNSCATLFTVDVYEKLRPGRPERE
LVRVGRLATAVVVALGLLWIPIMKVMAESKAGLYDYLQNVQGFLAPPITAVFLLGLASR
RINAQGAVWGLAVGFVLGMGKLTLQSMVQSGALSAATFLGAIGAFNGYYFSGLLFLVSV
LVIVGVSLRTAPPPEEKIRGLTFGSVAAQDRADSRRTWDWRDVVLTTIVLGLVLAIYLY
FSFWV"
/db_xref="SSO:000007615"
mRNA 1..684
CDS 1..684
/product="Sodium/sugar cotransporter"
/translation="GLRGLVVGGLLSALMSSLSSLFNSCATLFTVDVYEKLRPGRPERE
LVRVGRLATAVVVALGLLWIPIMKVMAESKAGLYDYLQNVQGFLAPPITAVFLLGLASR
RINAQGAVWGLAVGFVLGMGKLTLQSMVQSGALSAATFLGAIGAFNGYYFSGLLFLVSV
LVIVGVSLRTAPPPEEKIRGLTFGSVAAQDRADSRRTWDWRDVVLTTIVLGLVLAIYLY
FSFWV"
/db_xref="SSO:000007615"
repeat 568..680
/product="repeat region"
gene complement(735..3116)
/product="alpha-xylosidase (EC 3.2.1.177)"
/translation="MRRILCVLSFGLGVVLPGMGQNMRGDLVDVSEAFQRLDPVYFIPA
RTEAFDPATGQGQLRWQRYERQPSLSFGKIDRPLVRAQSTEFPATEYDQDPVLPFSIEP
VSAQSVRLRLLTRAAQADDAPSLMLAGPVPRDTRWQVHQTDSLITLTSPAGYQVWLYRD
PWRIAFYAPDGRLLTRTMTLQEPATFAFDRVPFCYIRRSEDLSHWTAATFELAPEEKLF
GTGESFTRLNKRGQKVVAFLRDGMGAQSQRMYKPIPFFLSSQGYGVFVHTSTPVTFDFG
YTFDQFNTIYTGDETLDLFFFFGTPKQILSEYTALTGRSPVPPLWSFGLWMSRITYDSE
QQVREVAAKLRQHRIPSDVIHLDTGWFETDWRNDYRFSTSRFTDPARMIADLKAQGFYI
SLWQLPYFSSKNPLYAEIVEKGLHVRSENGRLPFEDAVLDFSNPEAVAWYQEKLAALLR
MGVGAIKVDFGEDAPVNGIYASGRTGWYEHNLYPLRYNQAAAEITTRITGAHLIWARSA
WAGSQRYPLHWGGDAENTNSAMAATLRGGLSFGLSGFTYWSHDVGGFVAQPSADLYRRW
LAFGVLSSHVRCHGAPPREPWAYGDAFMADFRRTVELRYRLMPYLYAQAVRSSAEGHPM
LRTLFFEFPDDPTSWLIEDQYMLGEALLVAPLFADNARARQVYLPPGTWIDYQSGQVYE
GARWHTIEAGAVPIIVLVRDHTVLPHIELAQSTSAMNWRRLELQVFSTDGAPATGWVAL
PGQEAQALTVRFEEKKPVLQADPFQGSVQWTFQVRTVAVN"
mRNA complement(735..3116)
CDS complement(735..3116)
/product="alpha-xylosidase (EC 3.2.1.177)"
/translation="MRRILCVLSFGLGVVLPGMGQNMRGDLVDVSEAFQRLDPVYFIPA
RTEAFDPATGQGQLRWQRYERQPSLSFGKIDRPLVRAQSTEFPATEYDQDPVLPFSIEP
VSAQSVRLRLLTRAAQADDAPSLMLAGPVPRDTRWQVHQTDSLITLTSPAGYQVWLYRD
PWRIAFYAPDGRLLTRTMTLQEPATFAFDRVPFCYIRRSEDLSHWTAATFELAPEEKLF
GTGESFTRLNKRGQKVVAFLRDGMGAQSQRMYKPIPFFLSSQGYGVFVHTSTPVTFDFG
YTFDQFNTIYTGDETLDLFFFFGTPKQILSEYTALTGRSPVPPLWSFGLWMSRITYDSE
QQVREVAAKLRQHRIPSDVIHLDTGWFETDWRNDYRFSTSRFTDPARMIADLKAQGFYI
SLWQLPYFSSKNPLYAEIVEKGLHVRSENGRLPFEDAVLDFSNPEAVAWYQEKLAALLR
MGVGAIKVDFGEDAPVNGIYASGRTGWYEHNLYPLRYNQAAAEITTRITGAHLIWARSA
WAGSQRYPLHWGGDAENTNSAMAATLRGGLSFGLSGFTYWSHDVGGFVAQPSADLYRRW
LAFGVLSSHVRCHGAPPREPWAYGDAFMADFRRTVELRYRLMPYLYAQAVRSSAEGHPM
LRTLFFEFPDDPTSWLIEDQYMLGEALLVAPLFADNARARQVYLPPGTWIDYQSGQVYE
GARWHTIEAGAVPIIVLVRDHTVLPHIELAQSTSAMNWRRLELQVFSTDGAPATGWVAL
PGQEAQALTVRFEEKKPVLQADPFQGSVQWTFQVRTVAVN"
gene 3277..3918
/product="Thymidine kinase (EC 2.7.1.21)"
/translation="MSTEPLILHRGGPVGWIEVICGSMFSGKTEELIRRLRRAQIARQR
VEVFKPCMDRRYSETDVVSHDENALRSTPVETAEQILLLAASADVVGIDEAQFFDMTLV
DVCQQLANEGKRVIVAGLDQDYLGRPFEPIPQLMAVAEYVTKLHAICAVCGAPANHSQR
LTNETGRVLLGAADRYEPRCRRCFQPPDRSATPAAAPLSTHVPPTPPMEP"
/db_xref="SSO:000008065"
mRNA 3277..3918
CDS 3277..3918
/product="Thymidine kinase (EC 2.7.1.21)"
/translation="MSTEPLILHRGGPVGWIEVICGSMFSGKTEELIRRLRRAQIARQR
VEVFKPCMDRRYSETDVVSHDENALRSTPVETAEQILLLAASADVVGIDEAQFFDMTLV
DVCQQLANEGKRVIVAGLDQDYLGRPFEPIPQLMAVAEYVTKLHAICAVCGAPANHSQR
LTNETGRVLLGAADRYEPRCRRCFQPPDRSATPAAAPLSTHVPPTPPMEP"
/db_xref="SSO:000008065"
gene 4146..7034
/product="DNA/RNA helicases, SNF2 family"
/translation="MMHPTPGSIVRCRNREWVLLPSDNPEVWLLRPLTGTEEDVVVVHK
GLVNLVGYSLPFERVEPATFPLPKAEDVSDAQSVHLLWQAARLTLREGATPFRSLGRIS
IRPRTYQFVPLLMALRLDPVRLFIADDVGVGKTIEALLIARELYDRGEIRRFCVLCPPY
LCDQWAVEIAQKFNLDPVVIRSGTVSQLERQVPTGKSIYEYFPVQVASIDFVKTDRNRH
QFLQFCPELVIVDEAHGAADAQGRTQQERHALLRDVARNPERHLILLTATPHSGKEDAF
RSLLGLLCPESAQWNIAKLDEQQRDILAKHFVQRTRADILSTWEPVAPFPQREPMDETY
ELSDRYRELFDRTYAFCSEIVRTGERLEERKRRVRYWGALALLRCVMSSPAAAVATLAA
RTGMAVEGDEEPEFSSYVLESTENRTDDETPTLPVEATEATLADTDRRRLRELARLAEQ
LRGPDQDSKLRRAIEIVQSLLQEGFHPILWCRYVATAEYVKEHLKQALGPNVQVVCITG
RVPYDERQIKIAEIDADRPRVLVATDCLSEGINLQEKFNAAVHYDLPWNPNRLEQREGR
VDRFGQPAKRVKVVRFFGRDNPVDGAVIQVLLEKAWLIHQTLGTHVPVPQEGESVLQAV
LEALFLRSRRQTSRQLALDLGLPEVEALHRRWDQDVERERINRTRFAQRALKPEEVQRE
LEATDAVLGDPAAVREFVLAAAQRLGLSVTPDRRLGVFRVAVSKEAIATLPEAIRLALP
SARTGYWLVSFESPTPEGAEYLGRNHRFVTALARFLLEDALAGREKLTVSRCGAIRTRA
VSALTTLALLRVRYLLQLPERAPLLSEEVLVVGWRGGGNSPLQWLEDDEALCLLAKGKP
DANIPLAEKRELVQRALEQVGEWRGTSSEWGRDNAFQKGVRERIDRRAGQLLESHKRIR
QAVSMRVRELEVKPQLPPDLLGILVLQPMLQP"
mRNA 4146..7034
CDS 4146..7034
/product="DNA/RNA helicases, SNF2 family"
/translation="MMHPTPGSIVRCRNREWVLLPSDNPEVWLLRPLTGTEEDVVVVHK
GLVNLVGYSLPFERVEPATFPLPKAEDVSDAQSVHLLWQAARLTLREGATPFRSLGRIS
IRPRTYQFVPLLMALRLDPVRLFIADDVGVGKTIEALLIARELYDRGEIRRFCVLCPPY
LCDQWAVEIAQKFNLDPVVIRSGTVSQLERQVPTGKSIYEYFPVQVASIDFVKTDRNRH
QFLQFCPELVIVDEAHGAADAQGRTQQERHALLRDVARNPERHLILLTATPHSGKEDAF
RSLLGLLCPESAQWNIAKLDEQQRDILAKHFVQRTRADILSTWEPVAPFPQREPMDETY
ELSDRYRELFDRTYAFCSEIVRTGERLEERKRRVRYWGALALLRCVMSSPAAAVATLAA
RTGMAVEGDEEPEFSSYVLESTENRTDDETPTLPVEATEATLADTDRRRLRELARLAEQ
LRGPDQDSKLRRAIEIVQSLLQEGFHPILWCRYVATAEYVKEHLKQALGPNVQVVCITG
RVPYDERQIKIAEIDADRPRVLVATDCLSEGINLQEKFNAAVHYDLPWNPNRLEQREGR
VDRFGQPAKRVKVVRFFGRDNPVDGAVIQVLLEKAWLIHQTLGTHVPVPQEGESVLQAV
LEALFLRSRRQTSRQLALDLGLPEVEALHRRWDQDVERERINRTRFAQRALKPEEVQRE
LEATDAVLGDPAAVREFVLAAAQRLGLSVTPDRRLGVFRVAVSKEAIATLPEAIRLALP
SARTGYWLVSFESPTPEGAEYLGRNHRFVTALARFLLEDALAGREKLTVSRCGAIRTRA
VSALTTLALLRVRYLLQLPERAPLLSEEVLVVGWRGGGNSPLQWLEDDEALCLLAKGKP
DANIPLAEKRELVQRALEQVGEWRGTSSEWGRDNAFQKGVRERIDRRAGQLLESHKRIR
QAVSMRVRELEVKPQLPPDLLGILVLQPMLQP"
gene 7031..11077
/product="Possible restriction /modification enzyme"
/translation="MSTFPAIHIEGGLLGPDILDQLFYGELPGQKLQYFEVDGRRSLTD
KIAEVFADARAQWEKFHRRLEHLPENDLATSVTRDAWMIPFFSLLDYELRYNPRAYDVD
GASFAISHRAGENEDAPPVHIVGARQELGRVAATGRPRLAPHSLVQEFLNRTEQLWGIV
TNGVTLRLLRDSTYIRRQAYVEFDLAQIMEEQRFKDFVVLYRLLHRTRLPQGVADAGEC
WLEKYYQHSLEQGGRVRERLRDGVEACLKRLANGFLAHPANGELRQRILAPADATHRLS
PEELYRQLLRLVYRFLFLLVSEDRGLISTNPIYREHYGVGRLRRFLDRRSAYTDHDDLW
CSLKVLWKVLANEQLASMLGVAPLNGELFETLDLDDYTISNRDLLEAFWHLAYYRERES
QPWRRVNYAALDVEELGSVYESLLDYHPQIDTSGSVPRFELAYGSERKSTGSYYTPPEL
VQELIRSALEPVLAERLKSTKTLQEKERAILSIRVLDPACGSGHFLLAAARRLGKELAR
VRTEEEEPSPEVLREATREVIAHCIYGVDKNPLAVELCRVALWLESHAKGKPLTFLDHR
IRCGDSLVGVLDVAALREGIPDAAYQPVGGDDRAVARALKQRNAQERSGQMGLFGGSLE
DALLSGALAALDVEAIPDDTPQEIARKAERHRQVQQSLDPMRKAANLWTAAFFQEMKPG
GLAITTDTVRRALAGQSLDGRVAGAADSLAQRLHFFHWPLEFPEVFADGGFDVVLGNPP
WERIKLQEQEFFSTRDPEIANAPNAAERKKRIDQLPKTNPELWREYQQALHAAESTSRF
LRGSGFYPLTGRGDINTYSVFAERMRAVLRPGGRLGIIVPTGIATDDTNKHFFAEVVTK
GELVSLYDFENRKGIFPAIHRSYKFCLFALRKADERSRPAPCPGSAAEFAFFLHEARDL
SDPERRFTLTSEDFRLLNPNTRTAPIFRSRRDAELTKHIYRRVPVLVEEAKGETGNPWG
VRFLAMFHMANDSHLFRARAELEAEGFRLDGNVFVRGAERYLPLYEAKMVHQFDHRFGD
YAMQPEGSESTQLPEVPLERLADPNYRVLPRYWVPEEEVEERLQTKGWDRGWLLGWRDI
TNTTNERTVIAAVIPRVGVGNNYPLIITKSAVSSYIGVVLSCVALDFVARQKVGGTHLN
FFIFEQLPVLPPSAFEQPLPFPWEREPSPLPPRSRPPTVADFVRPRVLELTYTAWDLQP
FAEDLGYDGPPFRYDPERRFWLRAELDALFFLLYLGTPEEWEKEASPELRALFPTPREA
VAYILDQFPIVRRKDEERYGEYRTKRIILEIYDAMAEARRTGHPWRSTLNAEARDDTGE
LQSYA"
mRNA 7031..11077
CDS 7031..11077
/product="Possible restriction /modification enzyme"
/translation="MSTFPAIHIEGGLLGPDILDQLFYGELPGQKLQYFEVDGRRSLTD
KIAEVFADARAQWEKFHRRLEHLPENDLATSVTRDAWMIPFFSLLDYELRYNPRAYDVD
GASFAISHRAGENEDAPPVHIVGARQELGRVAATGRPRLAPHSLVQEFLNRTEQLWGIV
TNGVTLRLLRDSTYIRRQAYVEFDLAQIMEEQRFKDFVVLYRLLHRTRLPQGVADAGEC
WLEKYYQHSLEQGGRVRERLRDGVEACLKRLANGFLAHPANGELRQRILAPADATHRLS
PEELYRQLLRLVYRFLFLLVSEDRGLISTNPIYREHYGVGRLRRFLDRRSAYTDHDDLW
CSLKVLWKVLANEQLASMLGVAPLNGELFETLDLDDYTISNRDLLEAFWHLAYYRERES
QPWRRVNYAALDVEELGSVYESLLDYHPQIDTSGSVPRFELAYGSERKSTGSYYTPPEL
VQELIRSALEPVLAERLKSTKTLQEKERAILSIRVLDPACGSGHFLLAAARRLGKELAR
VRTEEEEPSPEVLREATREVIAHCIYGVDKNPLAVELCRVALWLESHAKGKPLTFLDHR
IRCGDSLVGVLDVAALREGIPDAAYQPVGGDDRAVARALKQRNAQERSGQMGLFGGSLE
DALLSGALAALDVEAIPDDTPQEIARKAERHRQVQQSLDPMRKAANLWTAAFFQEMKPG
GLAITTDTVRRALAGQSLDGRVAGAADSLAQRLHFFHWPLEFPEVFADGGFDVVLGNPP
WERIKLQEQEFFSTRDPEIANAPNAAERKKRIDQLPKTNPELWREYQQALHAAESTSRF
LRGSGFYPLTGRGDINTYSVFAERMRAVLRPGGRLGIIVPTGIATDDTNKHFFAEVVTK
GELVSLYDFENRKGIFPAIHRSYKFCLFALRKADERSRPAPCPGSAAEFAFFLHEARDL
SDPERRFTLTSEDFRLLNPNTRTAPIFRSRRDAELTKHIYRRVPVLVEEAKGETGNPWG
VRFLAMFHMANDSHLFRARAELEAEGFRLDGNVFVRGAERYLPLYEAKMVHQFDHRFGD
YAMQPEGSESTQLPEVPLERLADPNYRVLPRYWVPEEEVEERLQTKGWDRGWLLGWRDI
TNTTNERTVIAAVIPRVGVGNNYPLIITKSAVSSYIGVVLSCVALDFVARQKVGGTHLN
FFIFEQLPVLPPSAFEQPLPFPWEREPSPLPPRSRPPTVADFVRPRVLELTYTAWDLQP
FAEDLGYDGPPFRYDPERRFWLRAELDALFFLLYLGTPEEWEKEASPELRALFPTPREA
VAYILDQFPIVRRKDEERYGEYRTKRIILEIYDAMAEARRTGHPWRSTLNAEARDDTGE
LQSYA"
gene 11086..12285
/translation="MRFIALPVGQGDAFYAESDAGFKVLVDGGRSRTQLPQLFRRYTGS
SGVDVLVCTHNDADHTEGLIGFLESELLCRELWLPGTWLETLQNLPNDPGETILFLREQ
LLKALKQGSLPEAREGRDFQEIAWRYAFPEFIERRPIRDDSQAHETTEGHDALPLDAYL
DESKIEALEAHLELFVDPPLWYWWLEYPYWRLPSSVARSCSTVAKDVRRLLELARLALN
RGIPVRCFQHDPLNVGNVTVFPGCPLRPLSAKPSQYVRPPKAANTAYMFQLARLTTENK
ESLVFFLDVGNGQPGVLFTADSDLKDVNVSDVPAYSIATVPHHGSHDNRLAYSRINKPM
VWVRSDCYCKNRPCAEFLRAPGRRFCTLCPKSGKPRQAVRLYQRKGVWVNLKTRPCACC
"
mRNA 11086..12285
CDS 11086..12285
/product=""
/translation="MRFIALPVGQGDAFYAESDAGFKVLVDGGRSRTQLPQLFRRYTGS
SGVDVLVCTHNDADHTEGLIGFLESELLCRELWLPGTWLETLQNLPNDPGETILFLREQ
LLKALKQGSLPEAREGRDFQEIAWRYAFPEFIERRPIRDDSQAHETTEGHDALPLDAYL
DESKIEALEAHLELFVDPPLWYWWLEYPYWRLPSSVARSCSTVAKDVRRLLELARLALN
RGIPVRCFQHDPLNVGNVTVFPGCPLRPLSAKPSQYVRPPKAANTAYMFQLARLTTENK
ESLVFFLDVGNGQPGVLFTADSDLKDVNVSDVPAYSIATVPHHGSHDNRLAYSRINKPM
VWVRSDCYCKNRPCAEFLRAPGRRFCTLCPKSGKPRQAVRLYQRKGVWVNLKTRPCACC
"
gene 12817..14778
/product="hypothetical protein"
/translation="MHPNQTILQSAEEVFKFLIQEGGLDPEGYDSGLVEELCSKLKLDI
LKLCKALLHAFRERKISRDRFINTFSNAIRARGVSIERFIGAFFKAIEPYARMMNELCV
FFVRHGARRTNEGMRMLFDFGNGPEELGFDLRHFREWAREWRRITQQVEVYGWDSRTLW
GLAHIFRDQLPGPHTWENFYSRRPQGTREWLDAYSQAYSRYGSEGQWLFPLPEPLPEPP
RVDVPEIDTWLERAWRVWESVVRAYSAFGPSDLEEQEELRRTLELPDFDNWDPKMLRVL
NSDRWPEVMAIGLYGWAEDLRRFPLEDRLNRARPALNRLNDLFSRIPRQTRTVQQLTQA
LIELLHLPIWRRRHELYQVWVLTQIDEALKPYRPKVHHVDGTLLFSFSGTHVATAECEE
GNLHVWSELRTPLKNPIGRGRKKGIQPDYTIALEPITNPLSTRVVVETKQYARASVRNF
VEALIDYARGRPKARVILVNYGAAPEWILDYVPDELRQRTVLLGCFRPGEQKVLTDFQH
LVREVLPSPHLAGATPERVFDLIAVDISGSMEKQLERAEVLEMLRWAIHSSPGACLLAV
DTEVRLRLNASDKALRQLLALPHNGGTNLPQALSKDDYRRGLVITDQDGWQQLENSGLK
PKMVLVLDQKAFVYVNAE"
/db_xref="SSO:000009137"
mRNA 12817..14778
CDS 12817..14778
/product="hypothetical protein"
/translation="MHPNQTILQSAEEVFKFLIQEGGLDPEGYDSGLVEELCSKLKLDI
LKLCKALLHAFRERKISRDRFINTFSNAIRARGVSIERFIGAFFKAIEPYARMMNELCV
FFVRHGARRTNEGMRMLFDFGNGPEELGFDLRHFREWAREWRRITQQVEVYGWDSRTLW
GLAHIFRDQLPGPHTWENFYSRRPQGTREWLDAYSQAYSRYGSEGQWLFPLPEPLPEPP
RVDVPEIDTWLERAWRVWESVVRAYSAFGPSDLEEQEELRRTLELPDFDNWDPKMLRVL
NSDRWPEVMAIGLYGWAEDLRRFPLEDRLNRARPALNRLNDLFSRIPRQTRTVQQLTQA
LIELLHLPIWRRRHELYQVWVLTQIDEALKPYRPKVHHVDGTLLFSFSGTHVATAECEE
GNLHVWSELRTPLKNPIGRGRKKGIQPDYTIALEPITNPLSTRVVVETKQYARASVRNF
VEALIDYARGRPKARVILVNYGAAPEWILDYVPDELRQRTVLLGCFRPGEQKVLTDFQH
LVREVLPSPHLAGATPERVFDLIAVDISGSMEKQLERAEVLEMLRWAIHSSPGACLLAV
DTEVRLRLNASDKALRQLLALPHNGGTNLPQALSKDDYRRGLVITDQDGWQQLENSGLK
PKMVLVLDQKAFVYVNAE"
/db_xref="SSO:000009137"
gene 15752..16021
/translation="MSILKLHSKILANYHDFVGSFIHIGDERVREFVRAMLEEKQRPWP
EPLVQLSPAYRRDATVDELVNEGTSPPCSAGAMKSAMANIAPSV"
mRNA 15752..16021
CDS 15752..16021
/product=""
/translation="MSILKLHSKILANYHDFVGSFIHIGDERVREFVRAMLEEKQRPWP
EPLVQLSPAYRRDATVDELVNEGTSPPCSAGAMKSAMANIAPSV"
gene 16103..17368
/product="CRISPR-associated RAMP Cmr1"
/translation="MSHKDWKLKALTDIWTGDADRQGERLVPTGLMGSLRWWFEVLVRG
LDGKACDPTTLVRCPDHAVKDPTKASHHCVVCELFGCTGWARKFRLVVLDTGGNIIQKQ
IAAGTEFTLRFIPLRPICDEEWCLLDCTLRIIAEYGAIGGKTVLKPSDQWGLADLGEED
FAEKNSSVWVENSRGGLPLQKGDVIKSVNGKTVGSLSELRSLLLDKRHGELVKVTVLRK
GREETMHLWAGKRHHQDFGLVSYVESPSNLNREITREHLEAYFSNNRWRREHNDQDFSW
ASLRYFWCVKGRYLARTAPDKSTFNLVVGRDPRKHCRDCGNIHDPPQKCPQTSRHPRRY
SEENPKTEWERWLAGRQQESKKVFSFKHPQEGGRTFGFVKPRTVEVDKMKRRLQQAWPD
LADGEFLTDEEILKSLCGGIRP"
mRNA 16103..17368
CDS 16103..17368
/product="CRISPR-associated RAMP Cmr1"
/translation="MSHKDWKLKALTDIWTGDADRQGERLVPTGLMGSLRWWFEVLVRG
LDGKACDPTTLVRCPDHAVKDPTKASHHCVVCELFGCTGWARKFRLVVLDTGGNIIQKQ
IAAGTEFTLRFIPLRPICDEEWCLLDCTLRIIAEYGAIGGKTVLKPSDQWGLADLGEED
FAEKNSSVWVENSRGGLPLQKGDVIKSVNGKTVGSLSELRSLLLDKRHGELVKVTVLRK
GREETMHLWAGKRHHQDFGLVSYVESPSNLNREITREHLEAYFSNNRWRREHNDQDFSW
ASLRYFWCVKGRYLARTAPDKSTFNLVVGRDPRKHCRDCGNIHDPPQKCPQTSRHPRRY
SEENPKTEWERWLAGRQQESKKVFSFKHPQEGGRTFGFVKPRTVEVDKMKRRLQQAWPD
LADGEFLTDEEILKSLCGGIRP"
gene 17413..18435
/product="DUF324 domain containing Cmr2-like protein"
/translation="MDRSLPSGLAAGFVDGCSVAFHEAEIRRLQAEGRKRQAQNDNQKK
EAQDRKKAEQEKNQARSCYMTQATRGTLNLPPELALTPWPPNLLHQNWLGLQVDFELLT
PWYSKDDRVFHVLDNPVRKDRVFGVPFMAAASWKGMLRWACRMQAGLQKHLEEGKRFED
WNDPLWILHLFGNEKGEERDFHQGALIFYPTWFDRIGFEVINPHSRERRAGTQPIYYEV
VPGRRPKQQERGQQEDDQQHQKNQDQFEEGGKGALHLLYAPWPGMKSVADPQEFIPKLL
KAIENLLTTYGISAKRTVGWGTAEIQKWRAFRKGQEPVSSDSKDDLWKKIQGWFQGGPP
"
mRNA 17413..18435
CDS 17413..18435
/product="DUF324 domain containing Cmr2-like protein"
/translation="MDRSLPSGLAAGFVDGCSVAFHEAEIRRLQAEGRKRQAQNDNQKK
EAQDRKKAEQEKNQARSCYMTQATRGTLNLPPELALTPWPPNLLHQNWLGLQVDFELLT
PWYSKDDRVFHVLDNPVRKDRVFGVPFMAAASWKGMLRWACRMQAGLQKHLEEGKRFED
WNDPLWILHLFGNEKGEERDFHQGALIFYPTWFDRIGFEVINPHSRERRAGTQPIYYEV
VPGRRPKQQERGQQEDDQQHQKNQDQFEEGGKGALHLLYAPWPGMKSVADPQEFIPKLL
KAIENLLTTYGISAKRTVGWGTAEIQKWRAFRKGQEPVSSDSKDDLWKKIQGWFQGGPP
"
gene 18432..21512
/product="CRISPR-associated protein Csx11"
/translation="MSTFDPAEKLRQHRPVLLACEAIGWLHMAGKARMEFLRYHGGDNV
QYDDLKWHDAEQPPFPWDALLGWVKTFSGSTIPNNAWPSSIKEFTEKHRDRNPGVLGLL
QAGHGMASGIEKNLPTKTSEYLGQSLPHLWLSSPFGHPKRNLFADPPDILRPRGWQQLV
AEMHRVLSNLAAQQAGDVVHWRQWRDQAIGPGSYIREAFLSTLAETRLPNNDVTLWDQS
YVAAALFKSAVAGGILQASSFPWKDDAIKQKTRWRLLTVAIGADHYEARAVKIGDWTGA
QATLDEFFTQVAQLVEVDLAVGTLLYRDSSVAVFSFPGERFDESVPASWLNGWEQYLQQ
EVDRIAEALHLETPPLVRMSAPTRSLVPMVQERREAVKVLSIPVHRSWNICHRVPQESQ
GHICPVCRVRLNGDSTNKGRPCKVCRERRAHRLNDWLHGRTAYDTIWFEEVADANNRIA
LLTLSLDVEPWLSGERVDSLRAQAIPEWSRYNPVLFEFWQRDENKRRQEINPVRPFDLM
NKLVEEIRKRFYEDADRLKFREDDLLLANLQEGYRHVRRANPKNKSESDPEYEERLYKI
FFRDIVEDRSDALNWDSLNDDERAAWLTHQLFRKLPSPGRVYRFWREAQEFFEELLGEF
RQIAARSANPWRVRRLLIMPDQNKSDRGWEGGVLYDGRWRDVQFSLVYVQALNGFVTAS
NLARLLKPEEHGSVLRGQTALVEEEDTFGRAKTLVIGAVQEIPPPYSHLGVYHPVIPLD
VSPLRFRVVVPMEAASECVDLALSLWKERFARVWDRLPLHVGVVAFERALSFQAVIEAA
RSLEDALTSQKEKPWAMTSKEAYGGVLTLQLRRQDSQMTVRMMPLRMPDGREDVFYPYL
RVEDQQLRSPRDFRHPDGALYRYAADLQIGDGVFVAPARVATLFMDSAAARFEKIEPFY
AEDWQKARALWQLLVRVAPSQTALQRFRSALNQLDQAWRQGPDQASADLWQATVHALLV
EHLGAKGAALEELTEAAAKGLLQHVIQWHLTVLKETL"
mRNA 18432..21512
CDS 18432..21512
/product="CRISPR-associated protein Csx11"
/translation="MSTFDPAEKLRQHRPVLLACEAIGWLHMAGKARMEFLRYHGGDNV
QYDDLKWHDAEQPPFPWDALLGWVKTFSGSTIPNNAWPSSIKEFTEKHRDRNPGVLGLL
QAGHGMASGIEKNLPTKTSEYLGQSLPHLWLSSPFGHPKRNLFADPPDILRPRGWQQLV
AEMHRVLSNLAAQQAGDVVHWRQWRDQAIGPGSYIREAFLSTLAETRLPNNDVTLWDQS
YVAAALFKSAVAGGILQASSFPWKDDAIKQKTRWRLLTVAIGADHYEARAVKIGDWTGA
QATLDEFFTQVAQLVEVDLAVGTLLYRDSSVAVFSFPGERFDESVPASWLNGWEQYLQQ
EVDRIAEALHLETPPLVRMSAPTRSLVPMVQERREAVKVLSIPVHRSWNICHRVPQESQ
GHICPVCRVRLNGDSTNKGRPCKVCRERRAHRLNDWLHGRTAYDTIWFEEVADANNRIA
LLTLSLDVEPWLSGERVDSLRAQAIPEWSRYNPVLFEFWQRDENKRRQEINPVRPFDLM
NKLVEEIRKRFYEDADRLKFREDDLLLANLQEGYRHVRRANPKNKSESDPEYEERLYKI
FFRDIVEDRSDALNWDSLNDDERAAWLTHQLFRKLPSPGRVYRFWREAQEFFEELLGEF
RQIAARSANPWRVRRLLIMPDQNKSDRGWEGGVLYDGRWRDVQFSLVYVQALNGFVTAS
NLARLLKPEEHGSVLRGQTALVEEEDTFGRAKTLVIGAVQEIPPPYSHLGVYHPVIPLD
VSPLRFRVVVPMEAASECVDLALSLWKERFARVWDRLPLHVGVVAFERALSFQAVIEAA
RSLEDALTSQKEKPWAMTSKEAYGGVLTLQLRRQDSQMTVRMMPLRMPDGREDVFYPYL
RVEDQQLRSPRDFRHPDGALYRYAADLQIGDGVFVAPARVATLFMDSAAARFEKIEPFY
AEDWQKARALWQLLVRVAPSQTALQRFRSALNQLDQAWRQGPDQASADLWQATVHALLV
EHLGAKGAALEELTEAAAKGLLQHVIQWHLTVLKETL"
gene 21531..22667
/product="CRISPR-associated RAMP Cmr4"
/translation="MSSFKPFVQIGIALDPIHVGTGGARIGRVDLTIVREPATRLPKIP
GSSLAGVYRTYVAMAETEAKPNRQVDGNTWPYYPHCAGLGQGGGTYLGHCGQPDCPVCT
VFGFARGKDQAGGFAGLAAFSDAQVLLFPVPTRRGPYWVTCPMALRQIGLEVNGVKENA
VYLGNAQHVAQQGQQPQQQAARPSPNKLNLGWLFLEVRRCQQFSKVTDKLRSLQVPDYI
LDRIALLTDQLFIHVVNSNLEVRTSVSINPETGAAEDKFLFSYEAMPRGTVLAWEIIAK
NPKHFKVGGKDVEVTLDSGKMDDPDKVHQVVQKAHPYLEHLGIGGMGTRGMGRLRVLYA
NQHHVQSEKVSCGEERQAARAGQPEAQPKQEASHASAS"
mRNA 21531..22667
CDS 21531..22667
/product="CRISPR-associated RAMP Cmr4"
/translation="MSSFKPFVQIGIALDPIHVGTGGARIGRVDLTIVREPATRLPKIP
GSSLAGVYRTYVAMAETEAKPNRQVDGNTWPYYPHCAGLGQGGGTYLGHCGQPDCPVCT
VFGFARGKDQAGGFAGLAAFSDAQVLLFPVPTRRGPYWVTCPMALRQIGLEVNGVKENA
VYLGNAQHVAQQGQQPQQQAARPSPNKLNLGWLFLEVRRCQQFSKVTDKLRSLQVPDYI
LDRIALLTDQLFIHVVNSNLEVRTSVSINPETGAAEDKFLFSYEAMPRGTVLAWEIIAK
NPKHFKVGGKDVEVTLDSGKMDDPDKVHQVVQKAHPYLEHLGIGGMGTRGMGRLRVLYA
NQHHVQSEKVSCGEERQAARAGQPEAQPKQEASHASAS"
gene 22651..23019
/product="CRISPR-associated RAMP Cmr5"
/translation="MHPQANPITNLDIRCAEVGRQLAAIQNIEEKVLNEALSVLEEQGP
YAMFLYVKARHDKVANDFQKHCVALLKQVYDDRTPANGDALEVVKQLAENLDDLLFARD
LLRNALGYARYHLKAKGS"
mRNA 22651..23019
CDS 22651..23019
/product="CRISPR-associated RAMP Cmr5"
/translation="MHPQANPITNLDIRCAEVGRQLAAIQNIEEKVLNEALSVLEEQGP
YAMFLYVKARHDKVANDFQKHCVALLKQVYDDRTPANGDALEVVKQLAENLDDLLFARD
LLRNALGYARYHLKAKGS"
gene 23022..23891
/product="DUF324 domain containing Cmr6-like protein"
/translation="MAWSLYRWVWQVESPLHIGMAPAGMLNRTRLYVPARTLWGALTAE
LARSKATSFPDYKGIGERLKKETRFSYLYPAEEVDGEWKAWLPRYREGKGLVWEREDRA
KSEKNRAFRMRLLSTRPGTAIAPESNTAHEGTLREFEVVGPYWRDEMGGRPVALVGYVF
VQSGTGAAEDKLQLCGSPVPEVLWCGGDTRYGLGKIRWVACRKVTDFFGCPVEYDKADP
VVQQSCRILAHVPANSMHMQGEYELLIGWDDDKLQAGPELYWQPGTVSNKPLPWKVLED
GYWEKDQQ"
mRNA 23022..23891
CDS 23022..23891
/product="DUF324 domain containing Cmr6-like protein"
/translation="MAWSLYRWVWQVESPLHIGMAPAGMLNRTRLYVPARTLWGALTAE
LARSKATSFPDYKGIGERLKKETRFSYLYPAEEVDGEWKAWLPRYREGKGLVWEREDRA
KSEKNRAFRMRLLSTRPGTAIAPESNTAHEGTLREFEVVGPYWRDEMGGRPVALVGYVF
VQSGTGAAEDKLQLCGSPVPEVLWCGGDTRYGLGKIRWVACRKVTDFFGCPVEYDKADP
VVQQSCRILAHVPANSMHMQGEYELLIGWDDDKLQAGPELYWQPGTVSNKPLPWKVLED
GYWEKDQQ"
gene 23888..28948
/product="Helicase, C-terminal:Type III restriction enzyme,
res subunit:DEAD/DEAH box helicase, N-terminal"
/translation="MSDHSKQATIFDLHQSVLADYQDFVRSFILIADERAREFVHQALK
EEAQLWPEPLLQLSPTYAAGASVDTLAQEGLIAAETARVFRRPDGAPFRLYRHQEEAIR
KALANESFVITSGTGSGKSLCYFLPIVDNLVRYPDTGGRVAALVVYPMNALVNSQFQAL
VNLKEHYERRTGKPFPVTFAKYTGETTNDEREQIRQHPPQLLLTNYVMGELLLVRPEDQ
RLLDRTGGGLRFLVFDELHTYRGRQGADVAMLVRRLKERCAAPKLVQIATSATMIASRE
ATSAERKQAVAEFAARFFGHPFTPEQVIEETLQPFTVGGPPAEVELQEALSAPLPEDEA
GFQHHPLVRWLEYELGIEPEPDGGFKRRTPRPLSEVAKRLADITGAKLEECVQRLREVL
VHRGSIFAFKLHQFISQGRALYATMENPKKRAFSLEGQLQAGNEKLYFPLKFCRQCGQD
YYHVLRKDERFLPHPLGIELEEDQSAGYLMLARPEGDWSEEQLPEEWLNANGKLKPTWR
KRVPQKVWVQPDGAFSIVPQPGAHAMWWQPEPFSLCLTCGEFYTAREREFAKLASLSSE
GRSSATTILATSLLRHAALTQAARDKLLTFTDNRQDASLQAGHFNDFVHVALLRAALYS
ALAKEKELTFDRIAKAVVEASGLTIADIAKNAELDPGSAAAQEVWRVFTDLTEYRLYED
LRRSWRVIHPNLEQVGLLKIEYRGLEGLCQSPDLAAVCPRLAAASTEERKALLRAILDQ
FRRKLAIQTRVLNETFQQQLRKRSEQYLNEFWGLDPDYDELRPASWFVRPGKSNRDAGG
FSLGERSLIGRFLKERLGVSGDAYWPTLDHLLDLLVQHGLLARLEPIDDHQRYQLDAAC
LRWCLGDGSAPPPDPLYSRRASGGAYAEIARTVNPFFQRFYQVQAASLAALEAREHTAQ
VVRPGERERRERRFRWDVQDRQLQAELGRRLPYLVCSPTMELGVDIADLELVHLRNVPP
TPANYAQRSGRAGRQGQPGLIVTYCGALNSHDQYFFQRRAEMVAGSVRPPRLELANEAL
LRAHIHAMWLAEVRLPLGRSIEEVIDMEREDLPLRENVAQQIQLSTQVKEELKARVRRL
LEADQGLLAAAGWFNDQWIERVLDEVPKAFDRAFDRWRELYRAARKQLEAAQSELVRTR
IREEQNRARLKQDEAIRQLNLLRQVDVAREEGDFYPYRYLASEGFLPGYNFPALPVRAW
VPRGQEGEFIARPRFLAIREFAPQNFLYHEGAQWESVAFQAPPGGLEERKSRKRFCYTC
GAFTDPDSDVCPVCKSRFDGENSLVTTILDMPNVRMQRRARITADEEERRRRGYELQTF
IQFAPETTGYRVQEADVVSRGTPVLRLIYAPAATLLRVNHGWRGATTPGFLVDFESGEI
ITSEEGEAKQPARQRRLERVSLAVHTTQNLLLIRLLATEWRQDDTVATTLRYALKRGVE
EAFQLEETELAAEAVGRGEHRSILLYEASEGGAGVLQRLVEEPGALSEVARTALEICHY
NLSGEDTKPECHAACYECLLSFANQLEALSINRRKVQQVLLDLAESRTELRVQGRSRQE
HLAWLRSLTDTRSELERRFLAVLAEGGYRLPDEAQKSIAEPRCIPDFFYEPNICVFCDG
AVHDDPAQRARDREIREELIRRGYRVITLRYDQNLHEQIKRYPEVFGS"
mRNA 23888..28948
CDS 23888..28948
/product="Helicase, C-terminal:Type III restriction enzyme,
res subunit:DEAD/DEAH box helicase, N-terminal"
/translation="MSDHSKQATIFDLHQSVLADYQDFVRSFILIADERAREFVHQALK
EEAQLWPEPLLQLSPTYAAGASVDTLAQEGLIAAETARVFRRPDGAPFRLYRHQEEAIR
KALANESFVITSGTGSGKSLCYFLPIVDNLVRYPDTGGRVAALVVYPMNALVNSQFQAL
VNLKEHYERRTGKPFPVTFAKYTGETTNDEREQIRQHPPQLLLTNYVMGELLLVRPEDQ
RLLDRTGGGLRFLVFDELHTYRGRQGADVAMLVRRLKERCAAPKLVQIATSATMIASRE
ATSAERKQAVAEFAARFFGHPFTPEQVIEETLQPFTVGGPPAEVELQEALSAPLPEDEA
GFQHHPLVRWLEYELGIEPEPDGGFKRRTPRPLSEVAKRLADITGAKLEECVQRLREVL
VHRGSIFAFKLHQFISQGRALYATMENPKKRAFSLEGQLQAGNEKLYFPLKFCRQCGQD
YYHVLRKDERFLPHPLGIELEEDQSAGYLMLARPEGDWSEEQLPEEWLNANGKLKPTWR
KRVPQKVWVQPDGAFSIVPQPGAHAMWWQPEPFSLCLTCGEFYTAREREFAKLASLSSE
GRSSATTILATSLLRHAALTQAARDKLLTFTDNRQDASLQAGHFNDFVHVALLRAALYS
ALAKEKELTFDRIAKAVVEASGLTIADIAKNAELDPGSAAAQEVWRVFTDLTEYRLYED
LRRSWRVIHPNLEQVGLLKIEYRGLEGLCQSPDLAAVCPRLAAASTEERKALLRAILDQ
FRRKLAIQTRVLNETFQQQLRKRSEQYLNEFWGLDPDYDELRPASWFVRPGKSNRDAGG
FSLGERSLIGRFLKERLGVSGDAYWPTLDHLLDLLVQHGLLARLEPIDDHQRYQLDAAC
LRWCLGDGSAPPPDPLYSRRASGGAYAEIARTVNPFFQRFYQVQAASLAALEAREHTAQ
VVRPGERERRERRFRWDVQDRQLQAELGRRLPYLVCSPTMELGVDIADLELVHLRNVPP
TPANYAQRSGRAGRQGQPGLIVTYCGALNSHDQYFFQRRAEMVAGSVRPPRLELANEAL
LRAHIHAMWLAEVRLPLGRSIEEVIDMEREDLPLRENVAQQIQLSTQVKEELKARVRRL
LEADQGLLAAAGWFNDQWIERVLDEVPKAFDRAFDRWRELYRAARKQLEAAQSELVRTR
IREEQNRARLKQDEAIRQLNLLRQVDVAREEGDFYPYRYLASEGFLPGYNFPALPVRAW
VPRGQEGEFIARPRFLAIREFAPQNFLYHEGAQWESVAFQAPPGGLEERKSRKRFCYTC
GAFTDPDSDVCPVCKSRFDGENSLVTTILDMPNVRMQRRARITADEEERRRRGYELQTF
IQFAPETTGYRVQEADVVSRGTPVLRLIYAPAATLLRVNHGWRGATTPGFLVDFESGEI
ITSEEGEAKQPARQRRLERVSLAVHTTQNLLLIRLLATEWRQDDTVATTLRYALKRGVE
EAFQLEETELAAEAVGRGEHRSILLYEASEGGAGVLQRLVEEPGALSEVARTALEICHY
NLSGEDTKPECHAACYECLLSFANQLEALSINRRKVQQVLLDLAESRTELRVQGRSRQE
HLAWLRSLTDTRSELERRFLAVLAEGGYRLPDEAQKSIAEPRCIPDFFYEPNICVFCDG
AVHDDPAQRARDREIREELIRRGYRVITLRYDQNLHEQIKRYPEVFGS"
gene 29103..30692
/product="Aerobic glycerol-3-phosphate dehydrogenase (EC
1.1.5.3)"
/translation="MQPALHREAFLERLQKQKAWDVIVIGGGATGLGVALDAAARGFQT
VLFEQHDFGKGTSSRSTKLIHGGVRYLREGDFRLVREALQERGRLLRNAPHLVWPRLFV
VPYGQWWERLLYGAGLWLYDRLAGQEQLGTLRRLNPAETHALIPTLRTEGLRGGLAYVD
GQFDDARLLVHLAWTAAEQGAVVLNYMPVEALIGTRRRLEGVLVRDAETGEHFELRGRV
IINATGAFADAVRRMDNPEASPLLALSQGVHLVLPRRFLPGEAALLVPRTDDGRVLFAI
PWHGQVLLGTTDEPVAQAQLEPTPTEDEITYLLTHAGRYLTPAPTRTDIRAVFAGLRPL
VRQSRLQNDTAHLSREHVIVVSRRGLVTVTGGKWTTYRRMAEETVDRALQVAGLPHRPS
PTAMLRLHGATPRLNPTNPWYLYGTDSALLQALLTARPELNTLLHPRLPYRMVEVVWAA
RYEMARTVEDVLARRTRALFLDAAAALEAAPAVARQLATELGRDNHWEQAQLQALVQLM
PHYLPALTATEA"
/db_xref="SSO:000000839"
mRNA 29103..30692
CDS 29103..30692
/product="Aerobic glycerol-3-phosphate dehydrogenase (EC
1.1.5.3)"
/translation="MQPALHREAFLERLQKQKAWDVIVIGGGATGLGVALDAAARGFQT
VLFEQHDFGKGTSSRSTKLIHGGVRYLREGDFRLVREALQERGRLLRNAPHLVWPRLFV
VPYGQWWERLLYGAGLWLYDRLAGQEQLGTLRRLNPAETHALIPTLRTEGLRGGLAYVD
GQFDDARLLVHLAWTAAEQGAVVLNYMPVEALIGTRRRLEGVLVRDAETGEHFELRGRV
IINATGAFADAVRRMDNPEASPLLALSQGVHLVLPRRFLPGEAALLVPRTDDGRVLFAI
PWHGQVLLGTTDEPVAQAQLEPTPTEDEITYLLTHAGRYLTPAPTRTDIRAVFAGLRPL
VRQSRLQNDTAHLSREHVIVVSRRGLVTVTGGKWTTYRRMAEETVDRALQVAGLPHRPS
PTAMLRLHGATPRLNPTNPWYLYGTDSALLQALLTARPELNTLLHPRLPYRMVEVVWAA
RYEMARTVEDVLARRTRALFLDAAAALEAAPAVARQLATELGRDNHWEQAQLQALVQLM
PHYLPALTATEA"
/db_xref="SSO:000000839"
gene complement(30786..32810)
/product="Alkaline phosphatase (EC 3.1.3.1)"
/translation="MKRIFHLLLLLCVPLSLMAQPRKHVILYIGDGHGIAPRTATRMAL
GQGRPGSRFSDEPNFRLLAQDRLRFHAMVTTHSLNSWITDSAPGASVYAVGRRGKIDNE
YISLDPETNAPLETILEAAKKAGYAVGLVTTTRVTHATPAAFASHIWNRDLEDYIAAQY
ISATQEEYEAIFNAGPGYDPARDWVLPEPKIGVELDVILGGGARHFLPRTNPNVHGHAT
VRDRNGQPIVDAQGNPILLSGRRTDNVDLIALAKQRGYVYVNSRDALLGILDRLGEFTP
NNEVKLLGLFNSSHRSYEAERQRLYPWEPSLWEMTMVAIEVLKRKSDKGFFLMVEGGRI
DHLEHANAGGIGYAEGRYTVVADVEAIVAEEVYNGGTNRLTGVYGSDYMIKEVLDFDYA
IAEGLKLMQDASAGQTLILVTSDHECGGFTVVGLHDAQDAQENGTRIRTYAREPRKTDG
RFTPVPENIDRGDDEIGGWFPEYRLVEFQGKLWPEPAGPTARRIVIAYGSNPMVNGNGG
TIGTTPGNHTPQDVWVGADDNVNGQFAGRLTGQGLLDNTDLFPIMRDFLQVSLTSNELL
PKEQKASLRAVEAFPNPFGETLQVTMKLEQPQVVSLEVYNALGQRVRVLRPLVQLTSGT
HTIAWDGRDDTGAAVASGLYLVVARTDDQIISRQVVRIR"
/db_xref="SSO:000000886"
mRNA complement(30786..32810)
CDS complement(30786..32810)
/product="Alkaline phosphatase (EC 3.1.3.1)"
/translation="MKRIFHLLLLLCVPLSLMAQPRKHVILYIGDGHGIAPRTATRMAL
GQGRPGSRFSDEPNFRLLAQDRLRFHAMVTTHSLNSWITDSAPGASVYAVGRRGKIDNE
YISLDPETNAPLETILEAAKKAGYAVGLVTTTRVTHATPAAFASHIWNRDLEDYIAAQY
ISATQEEYEAIFNAGPGYDPARDWVLPEPKIGVELDVILGGGARHFLPRTNPNVHGHAT
VRDRNGQPIVDAQGNPILLSGRRTDNVDLIALAKQRGYVYVNSRDALLGILDRLGEFTP
NNEVKLLGLFNSSHRSYEAERQRLYPWEPSLWEMTMVAIEVLKRKSDKGFFLMVEGGRI
DHLEHANAGGIGYAEGRYTVVADVEAIVAEEVYNGGTNRLTGVYGSDYMIKEVLDFDYA
IAEGLKLMQDASAGQTLILVTSDHECGGFTVVGLHDAQDAQENGTRIRTYAREPRKTDG
RFTPVPENIDRGDDEIGGWFPEYRLVEFQGKLWPEPAGPTARRIVIAYGSNPMVNGNGG
TIGTTPGNHTPQDVWVGADDNVNGQFAGRLTGQGLLDNTDLFPIMRDFLQVSLTSNELL
PKEQKASLRAVEAFPNPFGETLQVTMKLEQPQVVSLEVYNALGQRVRVLRPLVQLTSGT
HTIAWDGRDDTGAAVASGLYLVVARTDDQIISRQVVRIR"
/db_xref="SSO:000000886"
gene 33004..34005
/product="hypothetical protein"
/translation="MQRTAWLFLPLLLLGCRSTQPVAVSLPERLPGPPACLLPWYGGWI
IGSGNMLWWIRGNRPSQRWVLPASVRTATVDAKETLWLGTEAGLMRLDAPNASPERVPL
PALNRFPAVSALSLDKQHRLWVGTERYGVFAQTDTSWHPVLAVAPVYALSTTADGTVWV
GSGIGLFRQTTRGWQIYSEEGTGNHGLPDNLVENLIPLPTGLWVIMSESISFFPIDTTA
QPVEFAYLGHPGNYIYDAIDLPNGKYLLATEEGLVLLRELPRFEAHTGLQELRVLEHAL
AHLLSPQMLGLPKVQFTRLYRKKQMLYLAGPTGLYRVPLKKLQSHTVAAAGH"
/db_xref="SSO:000009137"
mRNA 33004..34005
CDS 33004..34005
/product="hypothetical protein"
/translation="MQRTAWLFLPLLLLGCRSTQPVAVSLPERLPGPPACLLPWYGGWI
IGSGNMLWWIRGNRPSQRWVLPASVRTATVDAKETLWLGTEAGLMRLDAPNASPERVPL
PALNRFPAVSALSLDKQHRLWVGTERYGVFAQTDTSWHPVLAVAPVYALSTTADGTVWV
GSGIGLFRQTTRGWQIYSEEGTGNHGLPDNLVENLIPLPTGLWVIMSESISFFPIDTTA
QPVEFAYLGHPGNYIYDAIDLPNGKYLLATEEGLVLLRELPRFEAHTGLQELRVLEHAL
AHLLSPQMLGLPKVQFTRLYRKKQMLYLAGPTGLYRVPLKKLQSHTVAAAGH"
/db_xref="SSO:000009137"
gene complement(33962..35890)
/product="Lead, cadmium, zinc and mercury transporting
ATPase (EC 3.6.3.3) (EC 3.6.3.5); Copper-translocating
P-type ATPase (EC 3.6.3.4)"
/translation="MVGRLGLKDMHRQVLFVALTLSGLVVGWLSDWLQGPPFVAAMAYG
LAYVFGGWDGLRNGVKALRQRTVDIDLLMVLAALGALVIGALAEGAMLLFLFSLSNMLQ
HYAFGRSRQAIQALMQLRPDRARVLRDGLAVELPLEAVRVGDVFVLKPGDRVPLDGVIV
RGESALDESTLTGESIPVDKGPGQEVYAGTINTTGNLEVRVTRLASDATLVRMIALIEQ
AQTEKAVVQRLIDRLEQPYAVGVLVVTALAVAIPVIFFQEPFTQAFYRAMTLMVAASPC
AVVISTPAAVLSAIAAGARRGMLFKGGVYLEALARVRAVAFDKTGTLTEGRVRLVQVGV
LEARLSEDALLQWAAAVQQYSEHHLARATLEAARQRRLTVPEAEGFRAVIGQGVRAVVE
GATIHIGNLRYFEAWEQNSLIKGWAAGRAVLETLARQGKTAVLVVREQTGQREVLGWLA
FADALRAEAMEVIQQLRRLGISSIVLLTGDNRHVAEAIGRQVGVDTVHAELLPAQKVVQ
VQALVEQFGAVAMVGDGVNDAAALAASTVGIALGRTGTDVALEAADVVLMSDDLRQLPY
ALALSRATRRTLSINFAIAFSAIILMITTIFLQGLPLPLAVIGHEGSTVLVALNGLRLL
RYGFATS"
/db_xref="SSO:000001777"
/db_xref="SSO:000004417"
mRNA complement(33962..35890)
CDS complement(33962..35890)
/product="Lead, cadmium, zinc and mercury transporting
ATPase (EC 3.6.3.3) (EC 3.6.3.5); Copper-translocating
P-type ATPase (EC 3.6.3.4)"
/translation="MVGRLGLKDMHRQVLFVALTLSGLVVGWLSDWLQGPPFVAAMAYG
LAYVFGGWDGLRNGVKALRQRTVDIDLLMVLAALGALVIGALAEGAMLLFLFSLSNMLQ
HYAFGRSRQAIQALMQLRPDRARVLRDGLAVELPLEAVRVGDVFVLKPGDRVPLDGVIV
RGESALDESTLTGESIPVDKGPGQEVYAGTINTTGNLEVRVTRLASDATLVRMIALIEQ
AQTEKAVVQRLIDRLEQPYAVGVLVVTALAVAIPVIFFQEPFTQAFYRAMTLMVAASPC
AVVISTPAAVLSAIAAGARRGMLFKGGVYLEALARVRAVAFDKTGTLTEGRVRLVQVGV
LEARLSEDALLQWAAAVQQYSEHHLARATLEAARQRRLTVPEAEGFRAVIGQGVRAVVE
GATIHIGNLRYFEAWEQNSLIKGWAAGRAVLETLARQGKTAVLVVREQTGQREVLGWLA
FADALRAEAMEVIQQLRRLGISSIVLLTGDNRHVAEAIGRQVGVDTVHAELLPAQKVVQ
VQALVEQFGAVAMVGDGVNDAAALAASTVGIALGRTGTDVALEAADVVLMSDDLRQLPY
ALALSRATRRTLSINFAIAFSAIILMITTIFLQGLPLPLAVIGHEGSTVLVALNGLRLL
RYGFATS"
/db_xref="SSO:000001777"
/db_xref="SSO:000004417"
gene 36468..37214
/product="hypothetical protein"
/translation="MCLRFWISWHQRLIARGWSLLGFGVLIGFLGFTLFLLGLSLALFQ
GMHPENLGNALTYSWGALLFVFLLLYYMAYRLSRKTDWHRAVLWRYANLQGYAFAFFLF
EPGILGSIGLYAIGLGIGLLMVFPLSKGLAALGLTLLFLIGVVALLFSGWFRWGLKAHG
RRDLPVAFIPVFWILGLVVVASNASSAMQAWMGHMLAYLQYVPLLGPYGEAMAAALSGA
SVCKAVAGLATHVTAAVLIAWALTRG"
/db_xref="SSO:000009137"
mRNA 36468..37214
CDS 36468..37214
/product="hypothetical protein"
/translation="MCLRFWISWHQRLIARGWSLLGFGVLIGFLGFTLFLLGLSLALFQ
GMHPENLGNALTYSWGALLFVFLLLYYMAYRLSRKTDWHRAVLWRYANLQGYAFAFFLF
EPGILGSIGLYAIGLGIGLLMVFPLSKGLAALGLTLLFLIGVVALLFSGWFRWGLKAHG
RRDLPVAFIPVFWILGLVVVASNASSAMQAWMGHMLAYLQYVPLLGPYGEAMAAALSGA
SVCKAVAGLATHVTAAVLIAWALTRG"
/db_xref="SSO:000009137"
gene 37218..37874
/product="hypothetical protein"
/translation="MCTRFRLLYRLHCRYQKLWPFLLALGLMALLLQQIGRYAPKAHET
LRLIYVVSSTFVLFTPFFQWFVRDQEWCCYRVWGSDLADLLRTKSYVLLLRQGIGALGL
VVLWLIVHPAYGLRDLLPMAAALLSGIGVGLTVGLAYYPTYRYWLAQGAFTAELLAGWA
QLLTIGMALLSYLWPAVVLLVVALCWLYHARLCARAARKLDIQELSLDAHGYPRT"
/db_xref="SSO:000009137"
mRNA 37218..37874
CDS 37218..37874
/product="hypothetical protein"
/translation="MCTRFRLLYRLHCRYQKLWPFLLALGLMALLLQQIGRYAPKAHET
LRLIYVVSSTFVLFTPFFQWFVRDQEWCCYRVWGSDLADLLRTKSYVLLLRQGIGALGL
VVLWLIVHPAYGLRDLLPMAAALLSGIGVGLTVGLAYYPTYRYWLAQGAFTAELLAGWA
QLLTIGMALLSYLWPAVVLLVVALCWLYHARLCARAARKLDIQELSLDAHGYPRT"
/db_xref="SSO:000009137"
gene 37855..38601
/product="ABC transporter, ATP-binding protein"
/translation="MDIPALEVHQCSKRFRSRKGTVQALKEVTFHLPPGACCGLVGPNG
AGKTTLLRILANVLKADAGQIFMFGQQIRWGQHSYKRQVGFMLEDLCLMERLTGREQLT
LAAHLYGLPPVQAQREIERLTACFEVHTALDRWIETYSSGMRRQLAFILALLHRPRLIV
LDEPFETLDAQALRTAVALLQERHREGATLLISAHQLGRLEQLCDYLIVLQRGQVRFAG
PLADFRARLPQTTSLEAAYLSWLAQF"
mRNA 37855..38601
CDS 37855..38601
/product="ABC transporter, ATP-binding protein"
/translation="MDIPALEVHQCSKRFRSRKGTVQALKEVTFHLPPGACCGLVGPNG
AGKTTLLRILANVLKADAGQIFMFGQQIRWGQHSYKRQVGFMLEDLCLMERLTGREQLT
LAAHLYGLPPVQAQREIERLTACFEVHTALDRWIETYSSGMRRQLAFILALLHRPRLIV
LDEPFETLDAQALRTAVALLQERHREGATLLISAHQLGRLEQLCDYLIVLQRGQVRFAG
PLADFRARLPQTTSLEAAYLSWLAQF"
gene complement(38660..39187)
/product="FIG01041643: hypothetical protein"
/translation="MNAAHLQPVLPLDTAHLHLMVNHLPLFGVLLGLLVGLYGAWRREE
SIVRVALMLFVLAGLGAVAAYFTGHGAEEMVEALGRSHDAIEAHEEAGNLAVYLTIALA
VLSLVMLVRRRPIAPAWRTALFVVAVVTFGVVGYAANLGGRISHPEITNTVQREAGRAL
IPEADEVGDVEH"
mRNA complement(38660..39187)
CDS complement(38660..39187)
/product="FIG01041643: hypothetical protein"
/translation="MNAAHLQPVLPLDTAHLHLMVNHLPLFGVLLGLLVGLYGAWRREE
SIVRVALMLFVLAGLGAVAAYFTGHGAEEMVEALGRSHDAIEAHEEAGNLAVYLTIALA
VLSLVMLVRRRPIAPAWRTALFVVAVVTFGVVGYAANLGGRISHPEITNTVQREAGRAL
IPEADEVGDVEH"
gene complement(39205..40458)
/product="Efflux transport system, outer membrane factor
(OMF) lipoprotein"
/translation="MRVWFVGLGMLFSAVAHAAAYSAVPDTLDIRAALSLALAQHPQLE
ALRAQKQVLSGRKLQAYGIESPELYFFREGIGSGQHFAEQRWTLVQRFDFPLTIYYRVQ
TVVREQQAWQAALEAEEARIRAEVKRAYTDVLYAQELLHLRQEEVVLLERLRQAAQARL
AAGLATELEVVRTEIQLADAQSRLEAAARDFVQARYELFRAIGLDPEAQRYDVVFPDTL
VYIPVTISQEAVLARLAQLPEMRSQQAAVEAARFHLRQARTSILPKLQLDLYPQDYGDG
YRFLGFQVGLSLPLGFLPSASGRVREARAQYEARRWEGRDLQLRLKQRAEAAWHGYDAA
RTIVERYARQVRDRSRELLARLEQGYRIGEVSLIELLDAQRLVLESEQRYYEALREYYH
RLIELEPFLDQELTYTSR"
/db_xref="SSO:000002420"
mRNA complement(39205..40458)
CDS complement(39205..40458)
/product="Efflux transport system, outer membrane factor
(OMF) lipoprotein"
/translation="MRVWFVGLGMLFSAVAHAAAYSAVPDTLDIRAALSLALAQHPQLE
ALRAQKQVLSGRKLQAYGIESPELYFFREGIGSGQHFAEQRWTLVQRFDFPLTIYYRVQ
TVVREQQAWQAALEAEEARIRAEVKRAYTDVLYAQELLHLRQEEVVLLERLRQAAQARL
AAGLATELEVVRTEIQLADAQSRLEAAARDFVQARYELFRAIGLDPEAQRYDVVFPDTL
VYIPVTISQEAVLARLAQLPEMRSQQAAVEAARFHLRQARTSILPKLQLDLYPQDYGDG
YRFLGFQVGLSLPLGFLPSASGRVREARAQYEARRWEGRDLQLRLKQRAEAAWHGYDAA
RTIVERYARQVRDRSRELLARLEQGYRIGEVSLIELLDAQRLVLESEQRYYEALREYYH
RLIELEPFLDQELTYTSR"
/db_xref="SSO:000002420"
gene complement(40467..43604)
/product="CzcABC family efflux RND transporter,
transmembrane protein"
/translation="MLHRLIDFSLRQKLVVLALVGLMAFGGLTALQHIPINSLPDVTPV
QVLILTKAGRYSPYDVEQLVSFPIETAMTGLPHVKEVRSISQFGLSAVTVEFEEGTDIY
FARQLVAQRLQDVRAQLPPDVSPPQLGPISTALGEIYQYVVRGEGYSLTELREIQDWVI
APQLRAVPGVTEVNSFGGFVKQYEVIVNPEQLRALRLSLRDIIEAIEQNNSVSGGNYLE
HNEEQYIIRGFGQIRTIADLERIIVARRGDRPVYLQDVAQVRLGQQIRQGAVTQDGRGE
VVTGIVMMLRGESGREVIRRVEEKIAEINPRLPQGVRIEKFYDQSDLIARTTGTIRDNL
IKGGFLVIAVLLLLLGEIKGALIVASVIPLSMLFAFIGMKAFGLAANLMSLGAIDFGMI
VDGSVVMVENMVHRLEGEHKGRSRLAVLRQAAHEVARPIFFGVLIILMVYVPIATFRGM
EGILYRPMAITVAAAVLGSLLLALVYVPAVAALVFRRGVRLRRNYVMEWLRPRYQRFLE
KSLQRRKSTLAVALLVFGAALVLLPFLGTEFLPELDEGSILIEQVRMPSTTLESSVEKA
NWLAGVLVRHIPEIQTVVPKTGRSDLANDWMGVHQTDVWIILKPRQEWRPGITKEKIIE
QIRPFLETEPGLAYNFTQPIAMRVDELTSGIRSDIAVKLYGENLDTLMAIATRIAHQLP
SLPGTDNFYVEKFSGQPYLNIEIDREAIAAFGLNVEDVQQVIEAGLGGMPAGQVFEGQR
RFDIVVRFPEAYRNTFAAILEAPVSLPGGGTIPLHRVAHIRAEEGPREIARENGWRRLV
IGINLKDIDIGTYVSRLQQLIETHVQLPPGVFLEYGGAFENQQRAMRHLYIAVPMALLI
IVGLLYLMFGQMRYPMMILSVLPLALAGGVFALWLRGMYLSVSAAVGFIALFGVAVLNG
VVLVAHLNALRRQGLSVREAVVQGATDRLRPVLMTALVASLGFVPMALSTGPGAEVQRP
LATVVIGGLITATLLTLRVLPVLYDWLERDDRPPRGPEPEWEGDGQAAATVMGTQT"
mRNA complement(40467..43604)
CDS complement(40467..43604)
/product="CzcABC family efflux RND transporter,
transmembrane protein"
/translation="MLHRLIDFSLRQKLVVLALVGLMAFGGLTALQHIPINSLPDVTPV
QVLILTKAGRYSPYDVEQLVSFPIETAMTGLPHVKEVRSISQFGLSAVTVEFEEGTDIY
FARQLVAQRLQDVRAQLPPDVSPPQLGPISTALGEIYQYVVRGEGYSLTELREIQDWVI
APQLRAVPGVTEVNSFGGFVKQYEVIVNPEQLRALRLSLRDIIEAIEQNNSVSGGNYLE
HNEEQYIIRGFGQIRTIADLERIIVARRGDRPVYLQDVAQVRLGQQIRQGAVTQDGRGE
VVTGIVMMLRGESGREVIRRVEEKIAEINPRLPQGVRIEKFYDQSDLIARTTGTIRDNL
IKGGFLVIAVLLLLLGEIKGALIVASVIPLSMLFAFIGMKAFGLAANLMSLGAIDFGMI
VDGSVVMVENMVHRLEGEHKGRSRLAVLRQAAHEVARPIFFGVLIILMVYVPIATFRGM
EGILYRPMAITVAAAVLGSLLLALVYVPAVAALVFRRGVRLRRNYVMEWLRPRYQRFLE
KSLQRRKSTLAVALLVFGAALVLLPFLGTEFLPELDEGSILIEQVRMPSTTLESSVEKA
NWLAGVLVRHIPEIQTVVPKTGRSDLANDWMGVHQTDVWIILKPRQEWRPGITKEKIIE
QIRPFLETEPGLAYNFTQPIAMRVDELTSGIRSDIAVKLYGENLDTLMAIATRIAHQLP
SLPGTDNFYVEKFSGQPYLNIEIDREAIAAFGLNVEDVQQVIEAGLGGMPAGQVFEGQR
RFDIVVRFPEAYRNTFAAILEAPVSLPGGGTIPLHRVAHIRAEEGPREIARENGWRRLV
IGINLKDIDIGTYVSRLQQLIETHVQLPPGVFLEYGGAFENQQRAMRHLYIAVPMALLI
IVGLLYLMFGQMRYPMMILSVLPLALAGGVFALWLRGMYLSVSAAVGFIALFGVAVLNG
VVLVAHLNALRRQGLSVREAVVQGATDRLRPVLMTALVASLGFVPMALSTGPGAEVQRP
LATVVIGGLITATLLTLRVLPVLYDWLERDDRPPRGPEPEWEGDGQAAATVMGTQT"
gene complement(43607..44776)
/product="CzcABC family efflux RND transporter, membrane
fusion protein"
/translation="MRWWILLVSLAACQQAPVEQLLPKATEAPASVRPVADSAAPRVLR
LTAEQQRQLQVRVAPVVYQRAYYEVVIPGEVYAAPGLMAQVASPIDGRVARLQVREGEA
VRRGQVLLELESLSFAELVSDFLEAQAEEAYLERQLARLKQLVAQALSPQSALDRTEAD
FVRAQAQRMAAEVRLRALGITPEEAQQWGRQERPLLPIRALIDGYVDQRQVELGQAVSA
HQELMRILNPTRVHIRGFLAPEDAVGLEPGDSVRLVLQMPDSLVLQAQVHTINPALDPE
SRAVVVNIISDTRQGWPKPGQSVRLRLQLQTPQPVYVVPLQALAYDGQQAIVFVQHTPD
TYEVRPVTVWRIDERQVLLLAGVRQGEAVVVEPVFSLKALLRYAEFAEE"
mRNA complement(43607..44776)
CDS complement(43607..44776)
/product="CzcABC family efflux RND transporter, membrane
fusion protein"
/translation="MRWWILLVSLAACQQAPVEQLLPKATEAPASVRPVADSAAPRVLR
LTAEQQRQLQVRVAPVVYQRAYYEVVIPGEVYAAPGLMAQVASPIDGRVARLQVREGEA
VRRGQVLLELESLSFAELVSDFLEAQAEEAYLERQLARLKQLVAQALSPQSALDRTEAD
FVRAQAQRMAAEVRLRALGITPEEAQQWGRQERPLLPIRALIDGYVDQRQVELGQAVSA
HQELMRILNPTRVHIRGFLAPEDAVGLEPGDSVRLVLQMPDSLVLQAQVHTINPALDPE
SRAVVVNIISDTRQGWPKPGQSVRLRLQLQTPQPVYVVPLQALAYDGQQAIVFVQHTPD
TYEVRPVTVWRIDERQVLLLAGVRQGEAVVVEPVFSLKALLRYAEFAEE"
gene 44919..45620
/product="Two-component transcriptional response regulator,
OmpR family"
/translation="MAARLLVVEDEAKLASLLRQGLEEEGYAVDWVLTGEEALARLEHF
PPALMIVDVRLPGIDGIELCRRVRSRWPELPILVLTALDGVEDRVRGLRAGADDYLPKP
FAFEELLARIEALLRRSQRQALRQVLRDGPLTLDLQARTASCGTQPLHLTPREFDLLAY
LLQHPLQALTRAQLYREVWHENFDRGTNLVEVYINYLRQKLKAAGCPGRIATVWGVGYR
YEPGGATRWKP"
mRNA 44919..45620
CDS 44919..45620
/product="Two-component transcriptional response regulator,
OmpR family"
/translation="MAARLLVVEDEAKLASLLRQGLEEEGYAVDWVLTGEEALARLEHF
PPALMIVDVRLPGIDGIELCRRVRSRWPELPILVLTALDGVEDRVRGLRAGADDYLPKP
FAFEELLARIEALLRRSQRQALRQVLRDGPLTLDLQARTASCGTQPLHLTPREFDLLAY
LLQHPLQALTRAQLYREVWHENFDRGTNLVEVYINYLRQKLKAAGCPGRIATVWGVGYR
YEPGGATRWKP"
gene 45608..47068
/product="Two-component system sensor histidine kinase"
/translation="METLTYLPSFRRRLLRKSGGILVMALGLAGLAAWLMAYVWINQMA
RLPLQNEAQLVAHAIVQGGELQIEAYYWDEPHHRLLERHIDPFFLQVFDAKGRLLRQSD
NIALLGAPYPQTLLHPPVAQEPFWQPLRTFRIGSHTLYYVVYPLYDAQQRYLGALQLAR
LEPGFLALYRQTALGIGLIWAVLSGLTLLLLALSSQRVLGPLHQLTQATAALSADRLHE
PIRIQGPLDRETALLLSALNDLLRRLHEAFDELRRFTANASHELKTPLTILRGQAELAL
RRPRSAEHYRETLHNILRQTEHLTTLVEHLLLLSRLDQPETPFSFTPVDLSALVAQELE
PFRARAAARGIALTAALDPKAQTMGVATLLKEVVRNVLDNALKYTPKGAIEVTVMRSGT
QVVLEVRDTGVGIPPEALPHITERFYRVPSTAAGVEGHGLGLALVARIVTLHNGVLGFA
SQVGQGTTVRVTLPALAIAIPDPQPIDT"
mRNA 45608..47068
CDS 45608..47068
/product="Two-component system sensor histidine kinase"
/translation="METLTYLPSFRRRLLRKSGGILVMALGLAGLAAWLMAYVWINQMA
RLPLQNEAQLVAHAIVQGGELQIEAYYWDEPHHRLLERHIDPFFLQVFDAKGRLLRQSD
NIALLGAPYPQTLLHPPVAQEPFWQPLRTFRIGSHTLYYVVYPLYDAQQRYLGALQLAR
LEPGFLALYRQTALGIGLIWAVLSGLTLLLLALSSQRVLGPLHQLTQATAALSADRLHE
PIRIQGPLDRETALLLSALNDLLRRLHEAFDELRRFTANASHELKTPLTILRGQAELAL
RRPRSAEHYRETLHNILRQTEHLTTLVEHLLLLSRLDQPETPFSFTPVDLSALVAQELE
PFRARAAARGIALTAALDPKAQTMGVATLLKEVVRNVLDNALKYTPKGAIEVTVMRSGT
QVVLEVRDTGVGIPPEALPHITERFYRVPSTAAGVEGHGLGLALVARIVTLHNGVLGFA
SQVGQGTTVRVTLPALAIAIPDPQPIDT"
gene complement(47065..48351)
/product="L-sorbosone dehydrogenase"
/translation="MVRVFLLAGCLGLLLGCHNAQHAPADDQALGCDPDNGGITLPAGF
CAQVVADEVGRARHLVVRDNGDIYVALMELKNGHGIAALRDTTGDGRADVIAYFGEVPG
TGIDIWNGYLYFAPDTALLRYRLVEGELVPQGPPELVAGGLPERGQHAAKTFAFDQAGY
VYVNIGAPSNACQSRDRQRGVPGMDPCPLLEQYGGIWRFRANLTGQRQQDGLRYATGIR
NAVAIAWNPWANALYVVQHGRDQLNTLWPEYFDAEDNANLPAEEFFRVDEGDDFGWPYC
YYDPIQNKKVLAPEYGGDGQTVGRCAQFEDPLVAYPAHWAPNDLIFYNGTQFPERYRSG
AFIAFHGSWNRAPLPQAGYNVVFQPMNPDGTPSGAWEVFADGFAGATPIQSTGEARHRP
MGLAVGPDGALYISDSVRGRIWRVVYQGS"
mRNA complement(47065..48351)
CDS complement(47065..48351)
/product="L-sorbosone dehydrogenase"
/translation="MVRVFLLAGCLGLLLGCHNAQHAPADDQALGCDPDNGGITLPAGF
CAQVVADEVGRARHLVVRDNGDIYVALMELKNGHGIAALRDTTGDGRADVIAYFGEVPG
TGIDIWNGYLYFAPDTALLRYRLVEGELVPQGPPELVAGGLPERGQHAAKTFAFDQAGY
VYVNIGAPSNACQSRDRQRGVPGMDPCPLLEQYGGIWRFRANLTGQRQQDGLRYATGIR
NAVAIAWNPWANALYVVQHGRDQLNTLWPEYFDAEDNANLPAEEFFRVDEGDDFGWPYC
YYDPIQNKKVLAPEYGGDGQTVGRCAQFEDPLVAYPAHWAPNDLIFYNGTQFPERYRSG
AFIAFHGSWNRAPLPQAGYNVVFQPMNPDGTPSGAWEVFADGFAGATPIQSTGEARHRP
MGLAVGPDGALYISDSVRGRIWRVVYQGS"
gene 48422..49030
/product="hypothetical protein"
/translation="MATEIYNTTRFFLVLTLLLGGLSCRTLREWQALRQVDFYLDRIDE
VYLAGINLSTIQHYEDLEASQIAQLSLALAQGTLPLRFRLYVVAVNPRENRVTARLERL
EWTLRLDERPLLSGLIDRTYRLPPGEPQSIPVDIELDLLDFFEKNLRDLVELALALSGT
EGVTKRVSLTAKPFVQTPFGPLSYPQPMLILSRDVGTTP"
/db_xref="SSO:000009137"
mRNA 48422..49030
CDS 48422..49030
/product="hypothetical protein"
/translation="MATEIYNTTRFFLVLTLLLGGLSCRTLREWQALRQVDFYLDRIDE
VYLAGINLSTIQHYEDLEASQIAQLSLALAQGTLPLRFRLYVVAVNPRENRVTARLERL
EWTLRLDERPLLSGLIDRTYRLPPGEPQSIPVDIELDLLDFFEKNLRDLVELALALSGT
EGVTKRVSLTAKPFVQTPFGPLSYPQPMLILSRDVGTTP"
/db_xref="SSO:000009137"
gene 49040..50059
/product="hypothetical protein"
/translation="MLGFKAHIILGAVVLLCWSGCLADLPRDNPMDPRSDQYAPQGRVE
GIVTRQYPPYPPLAGVLVYLWPETDTIAQGRTARSNTAGRFVFSEVPPGRYRLWVQAAG
YRALQDTQYVEVISNQTLTLNVRLNALPYFATYMLTTVHISRWWPQSDLYRLEVEAQVI
DPDDLRDVMRVWLEIPALQFSDTLQSTQPAGRFFTIIPAEALPLPSLHALIGYDLYLGA
LDRNGDTVHTSALRLSRIIDAVPTALEPRGLAVVDTTQPLLRWERLDMPFPFTYRIDVV
RREADLDIPVVTLENLSATRDSVRIPQPLASGVYYWTVSLVDAFGNRSRSKEAGFQVP"
/db_xref="SSO:000009137"
mRNA 49040..50059
CDS 49040..50059
/product="hypothetical protein"
/translation="MLGFKAHIILGAVVLLCWSGCLADLPRDNPMDPRSDQYAPQGRVE
GIVTRQYPPYPPLAGVLVYLWPETDTIAQGRTARSNTAGRFVFSEVPPGRYRLWVQAAG
YRALQDTQYVEVISNQTLTLNVRLNALPYFATYMLTTVHISRWWPQSDLYRLEVEAQVI
DPDDLRDVMRVWLEIPALQFSDTLQSTQPAGRFFTIIPAEALPLPSLHALIGYDLYLGA
LDRNGDTVHTSALRLSRIIDAVPTALEPRGLAVVDTTQPLLRWERLDMPFPFTYRIDVV
RREADLDIPVVTLENLSATRDSVRIPQPLASGVYYWTVSLVDAFGNRSRSKEAGFQVP"
/db_xref="SSO:000009137"
gene 50056..51546
/product="transcriptional regulator, NifA subfamily, Fis
Family"
/translation="MSAPPTMRTSFEALAEIALVINTLRDPEVLLEKVLEIAIETLEAE
RGFILLKAPQYPEGFAIRAQRNFTEQQLGEIVRISTSVVHEVLRTGQPVLLYEAQQDER
YRKAESIVIQRIQSIACVPLRIKERLIGAIYLDSLSRRSPFTRECLPFLEAFAHQAAVA
IENAQLYQSLREENRRLRSEIQRLHGFEGIVGQSPAMREVFDTMARVLDTDATVLIEGE
SGTGKELIARALHYNGERKHQPFVAVFCGSLPDELLESELFGHKKGAFTGALSDKKGLF
EVADGGTVFLDEVGDLSPRMQTALLRVLQEGEIRRVGDTQIRKVDVRVISATNKPLREL
VRQGKFREDLYYRLNTIQITVPPLRQRRGDIPLLAHHFLDKYAVKKRAHIKGFTPQALE
ALERYHWPGNVRELENTIERAVVLARGEFITPEDLRLPETDGADPFEPDLPLHEVERRV
VLRTLKRHEGNISETARVLGVSRRWLHYKLKEWHVQDA"
mRNA 50056..51546
CDS 50056..51546
/product="transcriptional regulator, NifA subfamily, Fis
Family"
/translation="MSAPPTMRTSFEALAEIALVINTLRDPEVLLEKVLEIAIETLEAE
RGFILLKAPQYPEGFAIRAQRNFTEQQLGEIVRISTSVVHEVLRTGQPVLLYEAQQDER
YRKAESIVIQRIQSIACVPLRIKERLIGAIYLDSLSRRSPFTRECLPFLEAFAHQAAVA
IENAQLYQSLREENRRLRSEIQRLHGFEGIVGQSPAMREVFDTMARVLDTDATVLIEGE
SGTGKELIARALHYNGERKHQPFVAVFCGSLPDELLESELFGHKKGAFTGALSDKKGLF
EVADGGTVFLDEVGDLSPRMQTALLRVLQEGEIRRVGDTQIRKVDVRVISATNKPLREL
VRQGKFREDLYYRLNTIQITVPPLRQRRGDIPLLAHHFLDKYAVKKRAHIKGFTPQALE
ALERYHWPGNVRELENTIERAVVLARGEFITPEDLRLPETDGADPFEPDLPLHEVERRV
VLRTLKRHEGNISETARVLGVSRRWLHYKLKEWHVQDA"
gene 51525..53204
/product="Serine/threonine protein kinase"
/translation="MARPGRIADLQPFAELASGPTATVYKAYQASLDRFVLLKVLHADL
ACEPDLAEHFEEEARLAARVQHPNVVAVYAFGRTEDQLYLVTEFVEGCSLRELLRHGPL
PLPIALYIAAEVTRGLKAAHEKGILHRDLKPSNILISLEGQVKLTDFGMATSLAKATGD
ALRGTPAYLAPELLLGEAPSPQADLFALGATLFEMLTGVQAFPGETTGEIFDALLHHDP
LPRLRTLARAPEAVVQLCARLLAKQPTARYATADEVLQALAQVQHQEGFWATAKELSLY
LEHPASFQAAAASPPTLPPAPTATPSRRLRRSLWLSISLGLLGLSIITFWSLRVGPVDT
MVSPPADTTLTLTQDTVPSETLSTAPSNTPLQSALEPNFPASRSPQDTVEHSLPTSPPP
SSLSATTAPAAHPPKARLRLQVTPWAYVFLENAGQLDSIGVTPLDTPLALTPGTYTLYL
RNPEFPPHRFSVSLHAGQDTLLNVSLWAQVGRLWLAIHPWAYVYLNDRFYDVMPPQEQP
LIVSPGTHRLRLVHPSLGTIDTLVHVQAGTEQTIQIDLMRRP"
mRNA 51525..53204
CDS 51525..53204
/product="Serine/threonine protein kinase"
/translation="MARPGRIADLQPFAELASGPTATVYKAYQASLDRFVLLKVLHADL
ACEPDLAEHFEEEARLAARVQHPNVVAVYAFGRTEDQLYLVTEFVEGCSLRELLRHGPL
PLPIALYIAAEVTRGLKAAHEKGILHRDLKPSNILISLEGQVKLTDFGMATSLAKATGD
ALRGTPAYLAPELLLGEAPSPQADLFALGATLFEMLTGVQAFPGETTGEIFDALLHHDP
LPRLRTLARAPEAVVQLCARLLAKQPTARYATADEVLQALAQVQHQEGFWATAKELSLY
LEHPASFQAAAASPPTLPPAPTATPSRRLRRSLWLSISLGLLGLSIITFWSLRVGPVDT
MVSPPADTTLTLTQDTVPSETLSTAPSNTPLQSALEPNFPASRSPQDTVEHSLPTSPPP
SSLSATTAPAAHPPKARLRLQVTPWAYVFLENAGQLDSIGVTPLDTPLALTPGTYTLYL
RNPEFPPHRFSVSLHAGQDTLLNVSLWAQVGRLWLAIHPWAYVYLNDRFYDVMPPQEQP
LIVSPGTHRLRLVHPSLGTIDTLVHVQAGTEQTIQIDLMRRP"
gene 53314..54606
/product="hypothetical protein"
/translation="MGILIGFILLFVVATSQAQPAWRELPPMPTPRYAAAAATLHGRIY
VIGGIGLDGKPLTTVEAYDPALQAWIREVPQLEEPVAFAAAVTLEDNLYLIGGMDENGE
TTDEVWMLDWTQRWQRVASLQQERQELAAIAFGSQIYAIGGRSLAEGPSSIGRQVQPRS
LASIERYDPQKDAWEVLPFPIQLVQPVHLAAATTWEDKIYIIGGLSNNLPIGIIQQFRP
LTGEVVLDQTLLLPYEWWAGAALTYRNAILLLGGLSGKETGLTAVQALRWTDNGWQLES
LPPLRQARFSFAAVLHNDTIFVFGGLEQRDGKPLNNAEATSAAVLTNRQTETLPPDFWL
QPPYPHPFQEQVTFTFSLSSQQADKPVTLTVYDLLGRPVAHLLQGAVAPGSHVLVWDGR
TMLGSSLPAGVYIVRLVQGAFHQERLLIRAP"
/db_xref="SSO:000009137"
mRNA 53314..54606
CDS 53314..54606
/product="hypothetical protein"
/translation="MGILIGFILLFVVATSQAQPAWRELPPMPTPRYAAAAATLHGRIY
VIGGIGLDGKPLTTVEAYDPALQAWIREVPQLEEPVAFAAAVTLEDNLYLIGGMDENGE
TTDEVWMLDWTQRWQRVASLQQERQELAAIAFGSQIYAIGGRSLAEGPSSIGRQVQPRS
LASIERYDPQKDAWEVLPFPIQLVQPVHLAAATTWEDKIYIIGGLSNNLPIGIIQQFRP
LTGEVVLDQTLLLPYEWWAGAALTYRNAILLLGGLSGKETGLTAVQALRWTDNGWQLES
LPPLRQARFSFAAVLHNDTIFVFGGLEQRDGKPLNNAEATSAAVLTNRQTETLPPDFWL
QPPYPHPFQEQVTFTFSLSSQQADKPVTLTVYDLLGRPVAHLLQGAVAPGSHVLVWDGR
TMLGSSLPAGVYIVRLVQGAFHQERLLIRAP"
/db_xref="SSO:000009137"
gene 54612..55403
/product="hypothetical protein"
/translation="MQCWKFFGLASLWMLGAFPLQAQPTQPSPTQVLQEIWQAYQQLDY
GRVETLTRQALLHYQHYTPTQLVELHTVLALVLMARNEPAEARQHFEAALSLNPQLELD
PVLASPKVRDFFEQIRQERAHQSATENPLSWRYVVQPDPRPMAALRSLLFPGWGQRYKG
QTQKGWFLSTIWGLLVGSSLIAHLEYKWAWSAYLEETNPFRIEDHYRTANHWFKTRNTL
LLATGAVWLYGYLDALILPATSTQRLQLIPQINGMEVRWSF"
/db_xref="SSO:000009137"
mRNA 54612..55403
CDS 54612..55403
/product="hypothetical protein"
/translation="MQCWKFFGLASLWMLGAFPLQAQPTQPSPTQVLQEIWQAYQQLDY
GRVETLTRQALLHYQHYTPTQLVELHTVLALVLMARNEPAEARQHFEAALSLNPQLELD
PVLASPKVRDFFEQIRQERAHQSATENPLSWRYVVQPDPRPMAALRSLLFPGWGQRYKG
QTQKGWFLSTIWGLLVGSSLIAHLEYKWAWSAYLEETNPFRIEDHYRTANHWFKTRNTL
LLATGAVWLYGYLDALILPATSTQRLQLIPQINGMEVRWSF"
/db_xref="SSO:000009137"
gene complement(55459..57921)
/product="TonB-dependent receptor; Outer membrane receptor
for ferrienterochelin and colicins"
/translation="MRLGLRYGLGFLMLWGLAIDVSAQQGKLQGVVQRETGEPLSGAHV
YLEGTALGSVTDAEGRFLLAGIAPGEHVVVARSVGYETVRARVQLAAGATETLRFVLKE
RPIDLDAVVVRRTTLSEGRGTLLGLPGAVQLLTLRELERFRFNDIGRVLQSVPGVNVQE
EDGYGLRPNIGLRGSGSERSSKITVMEDGVLIAPAPYAAPAAYYFPTVGRMHAIEVRKG
SGQIKYGPYTTGGALNLISTPIPSSFSGKLDLLVGERQERTFHAHLGDSFTHGGFVVET
YQTRTDGFKKLDGGGPTGFEIQDYLVKLRLQTRPEAKFYNALTFKAVQRLETSHETYLG
LTEDDFARTPFRRYAGSQKDVMTTEHKHYILRHVMRPLRNVDVVTTLYRTDFHRNWYKL
DRVRASSSTSWVRIADLLANPQAYAAEYAIVTGQTSPIDQALEVKANNRTYYAQGIETI
VGWSYEGPALSHALEVGVRVHEDQLDRFQWSDYYRMDQGVMKLTEAGTPGTESNRIEQA
NAVSSYVQYRLEVGRWTVVPGLRYEHIVLKRSDYGRNDPQRTGVALQKQRNTVAVWIPG
IGVDYALRAGWHIFAGVHKGFAPPGATPGARPEESINYELGMRYRSRGLVLDGVVFFHD
YRNLLGADLTAVGGTGSGDLFNGGAVRAYGLELAAYYDLGPLGSWVRSMPVSFSYTLSQ
ATFEHAFQSQFEPWGRVAKGDELPYLPHHQLATSLDLIGTRTEVHVTGRYVSRMRTQAG
QGAFLPSQSTDPVFVLDVAADYRLAPQVKLFASVRNLTNTVYIASRRPAGLRPGLPRQF
LLGIKAEF"
/db_xref="SSO:000008104"
mRNA complement(55459..57921)
CDS complement(55459..57921)
/product="TonB-dependent receptor; Outer membrane receptor
for ferrienterochelin and colicins"
/translation="MRLGLRYGLGFLMLWGLAIDVSAQQGKLQGVVQRETGEPLSGAHV
YLEGTALGSVTDAEGRFLLAGIAPGEHVVVARSVGYETVRARVQLAAGATETLRFVLKE
RPIDLDAVVVRRTTLSEGRGTLLGLPGAVQLLTLRELERFRFNDIGRVLQSVPGVNVQE
EDGYGLRPNIGLRGSGSERSSKITVMEDGVLIAPAPYAAPAAYYFPTVGRMHAIEVRKG
SGQIKYGPYTTGGALNLISTPIPSSFSGKLDLLVGERQERTFHAHLGDSFTHGGFVVET
YQTRTDGFKKLDGGGPTGFEIQDYLVKLRLQTRPEAKFYNALTFKAVQRLETSHETYLG
LTEDDFARTPFRRYAGSQKDVMTTEHKHYILRHVMRPLRNVDVVTTLYRTDFHRNWYKL
DRVRASSSTSWVRIADLLANPQAYAAEYAIVTGQTSPIDQALEVKANNRTYYAQGIETI
VGWSYEGPALSHALEVGVRVHEDQLDRFQWSDYYRMDQGVMKLTEAGTPGTESNRIEQA
NAVSSYVQYRLEVGRWTVVPGLRYEHIVLKRSDYGRNDPQRTGVALQKQRNTVAVWIPG
IGVDYALRAGWHIFAGVHKGFAPPGATPGARPEESINYELGMRYRSRGLVLDGVVFFHD
YRNLLGADLTAVGGTGSGDLFNGGAVRAYGLELAAYYDLGPLGSWVRSMPVSFSYTLSQ
ATFEHAFQSQFEPWGRVAKGDELPYLPHHQLATSLDLIGTRTEVHVTGRYVSRMRTQAG
QGAFLPSQSTDPVFVLDVAADYRLAPQVKLFASVRNLTNTVYIASRRPAGLRPGLPRQF
LLGIKAEF"
/db_xref="SSO:000008104"
gene complement(58224..59666)
/product="RNA-2',3'-PO4:RNA-5'-OH ligase"
/translation="MTTLRFEKIHDYLWEIPKSGGMQVPARIYASEKILRELQEDQAPQ
QAVNVAHLPGIVKYALAMPDIHWGYGFPIGGVAAFDLEEGVISPGGVGYDINCGVRLLA
SRLSYQEVEPHLERLIDVLFQRVPTGVGASGALKVSRQELRRVAVEGAHWAVRQGFGTA
SDLECIEENGRIEGADPAAVSERAYERGAEQLGTLGSGNHFLEVGYVAQIYDDAAAQAM
GLFLGQVTVIIHTGSRGFGYQICDDYLAVMDRALAKYHIRLPDRQLACAPLRSPEGQQY
LAAMRCGINFAFANRQIIAHNTRKAFVEALGMREEEIGLRTVYEVAHNIAKIEEHTVDG
QRCQVCVHRKGATRAFPPGHPQIPAVYRSIGQPVLIPGDMGRYSYVLLGTAQAMEETFG
STCHGAGRQLSRTKAKKVAGSRRIADELRKQGIVVRGASLRTINEEIPEAYKDVAEVVE
VCHRAGISRKVAQLRPLGCIKG"
/db_xref="SSO:000006926"
mRNA complement(58224..59666)
CDS complement(58224..59666)
/product="RNA-2',3'-PO4:RNA-5'-OH ligase"
/translation="MTTLRFEKIHDYLWEIPKSGGMQVPARIYASEKILRELQEDQAPQ
QAVNVAHLPGIVKYALAMPDIHWGYGFPIGGVAAFDLEEGVISPGGVGYDINCGVRLLA
SRLSYQEVEPHLERLIDVLFQRVPTGVGASGALKVSRQELRRVAVEGAHWAVRQGFGTA
SDLECIEENGRIEGADPAAVSERAYERGAEQLGTLGSGNHFLEVGYVAQIYDDAAAQAM
GLFLGQVTVIIHTGSRGFGYQICDDYLAVMDRALAKYHIRLPDRQLACAPLRSPEGQQY
LAAMRCGINFAFANRQIIAHNTRKAFVEALGMREEEIGLRTVYEVAHNIAKIEEHTVDG
QRCQVCVHRKGATRAFPPGHPQIPAVYRSIGQPVLIPGDMGRYSYVLLGTAQAMEETFG
STCHGAGRQLSRTKAKKVAGSRRIADELRKQGIVVRGASLRTINEEIPEAYKDVAEVVE
VCHRAGISRKVAQLRPLGCIKG"
/db_xref="SSO:000006926"
gene 59880..61169
/product="Mannosyl-3-phosphoglycerate synthase (EC
2.4.1.217)"
/translation="MRIEIPREAERFGANHIFGVQKVYELDSGLRQDAPAAENSVIQNL
PYETLYEIERDMAVVVPIRDERLKLLEGVLFGIPHQCTVIVVSNSRRAPVDRFKMERDA
IETWSRFTQKRLLLIHQKDPFLARALAEAGYPYILDETERIADGKAEGMIAATLLARLL
GKRYIGFIDADNYFPGAVYEYVHEYAAGFALSNSPYTMVRIVWHSKPKVVQSQLFFAKY
GRTSVVTNRFLNQLISYYTGFETEVVRTGNAGEHAMTIELAMLLDYATGYAIEPYHYID
LLEKYGGVIESAHPEVMQHQVNLFQIESRNPHLHESKGEAHIDEMIFAALQVIYHSRIC
PEPIKREVLRELCRRGILAKGEEPPSPRIYPSLLHVDLEAFLNALWRAPYAEQLDALIQ
RPSHRRHLPQPPMASAEGDGSSTIASPHED"
/db_xref="SSO:000004714"
mRNA 59880..61169
CDS 59880..61169
/product="Mannosyl-3-phosphoglycerate synthase (EC
2.4.1.217)"
/translation="MRIEIPREAERFGANHIFGVQKVYELDSGLRQDAPAAENSVIQNL
PYETLYEIERDMAVVVPIRDERLKLLEGVLFGIPHQCTVIVVSNSRRAPVDRFKMERDA
IETWSRFTQKRLLLIHQKDPFLARALAEAGYPYILDETERIADGKAEGMIAATLLARLL
GKRYIGFIDADNYFPGAVYEYVHEYAAGFALSNSPYTMVRIVWHSKPKVVQSQLFFAKY
GRTSVVTNRFLNQLISYYTGFETEVVRTGNAGEHAMTIELAMLLDYATGYAIEPYHYID
LLEKYGGVIESAHPEVMQHQVNLFQIESRNPHLHESKGEAHIDEMIFAALQVIYHSRIC
PEPIKREVLRELCRRGILAKGEEPPSPRIYPSLLHVDLEAFLNALWRAPYAEQLDALIQ
RPSHRRHLPQPPMASAEGDGSSTIASPHED"
/db_xref="SSO:000004714"
gene 61159..61986
/product="Glucosyl-3-phosphoglycerate phosphatase (EC
3.1.3.85) @ Mannosyl-3-phosphoglycerate phosphatase (EC
3.1.3.70)"
/translation="MKTEHPLPIIFSDLDGTLLDLHTYDPGPAASVLQALQQQGIPIVF
CSSKTRAEQRFYQRQLSVHDPFIVENGAAIYIPIGYFSLTPKGHRLRHFEVIPLGRTAT
EIRRALHKIRQETGLCFQGYADLTPEAVAQLTGLSIEAARRAMRREYSETIVVHFDPKD
WQRFNAALAAHGLVCFAGGRLHTIVGAGTDKGQAVRLLTQLYQSQYGSVVTIGIGDSPN
DAPMLRVVDRPFLVQQPDGSWATLDVPGLVRIPAIGPEGWVQVVRMLLPEPIV"
/db_xref="SSO:000003132"
/db_xref="SSO:000004713"
mRNA 61159..61986
CDS 61159..61986
/product="Glucosyl-3-phosphoglycerate phosphatase (EC
3.1.3.85) @ Mannosyl-3-phosphoglycerate phosphatase (EC
3.1.3.70)"
/translation="MKTEHPLPIIFSDLDGTLLDLHTYDPGPAASVLQALQQQGIPIVF
CSSKTRAEQRFYQRQLSVHDPFIVENGAAIYIPIGYFSLTPKGHRLRHFEVIPLGRTAT
EIRRALHKIRQETGLCFQGYADLTPEAVAQLTGLSIEAARRAMRREYSETIVVHFDPKD
WQRFNAALAAHGLVCFAGGRLHTIVGAGTDKGQAVRLLTQLYQSQYGSVVTIGIGDSPN
DAPMLRVVDRPFLVQQPDGSWATLDVPGLVRIPAIGPEGWVQVVRMLLPEPIV"
/db_xref="SSO:000003132"
/db_xref="SSO:000004713"
gene complement(61990..62751)
/product="hypothetical protein"
/translation="MRLEAPGCYRSELFQELLSKYPEVLELYARHVEERPQAAAYQERC
LRQIPVVARWLSQELVADGRLGLCALVSALMSRLLDELGIWNYIVAGGCVITFIPADIR
PRYFYVFDMQAVEVPHAWVVAPPFWVIDLTLRQQRYPGDEGGRIPAAVLSRRAQPEAVV
PEEVCAPALLHGLMLRGIPKERVLRQVFPEFWRFHRFFPARVVVLPSVRLKYIPARLLL
PPWQAEWETMPLLNGKSFRQLRAQLEAYLEG"
/db_xref="SSO:000009137"
mRNA complement(61990..62751)
CDS complement(61990..62751)
/product="hypothetical protein"
/translation="MRLEAPGCYRSELFQELLSKYPEVLELYARHVEERPQAAAYQERC
LRQIPVVARWLSQELVADGRLGLCALVSALMSRLLDELGIWNYIVAGGCVITFIPADIR
PRYFYVFDMQAVEVPHAWVVAPPFWVIDLTLRQQRYPGDEGGRIPAAVLSRRAQPEAVV
PEEVCAPALLHGLMLRGIPKERVLRQVFPEFWRFHRFFPARVVVLPSVRLKYIPARLLL
PPWQAEWETMPLLNGKSFRQLRAQLEAYLEG"
/db_xref="SSO:000009137"
gene complement(63084..64847)
/product="Heat shock protein 10 kDa family chaperone GroES"
/translation="MMRHFITWLALWFFGAVGTVAQVAVPPQLIRPIQGAQLPSPLVQF
EWTPSSPSAPGLVYRLTVKPRYQGQSPTQAMASNPVSLQVDVPGTSYQTSLSEANALGA
DAAAPNYAGHVWHVQALLNGQPYGDNQGFSQIEGFSVPAMAVDPVKPPYAGLIWELPYT
ALIDGGAELTYDLPANVGDTLIMIVRVRVPQKLTEDTLALLQDTSNASPSARYTGYVLN
QAVASGAGRASGKTLGAVTRQAPPQGQGRGPVIPIRPSDVGLPEFRTSPGDTLDYYAGG
FYLYGRPGDTLVTDKEQEKRSYYAGGFYLYGGPGDTLVTDKEQETRSRYTGGYYVYGGP
GDTLVTDKEQEKRSYYAGGFYLYGGPGDTLVTDKEQETRSRYTGGFFVYTIPGNGEPPT
YAGYAKEYLIMRESDIYSIISKQAPVRVPVPEGSTTDFVSILKPAPKDTSKVKIKTVLP
PMEPYWWRQRSDTLTVPHTIFNPPDEILQGGLPLRQIAYNAGKEGAIIVERTGKAYVAG
HFVPHNILLPICPIAVQESDAFPEPLSDILVAVDEESGAIEYRWLVLRRELTQIQAVVR
LDCERDFYPIK"
mRNA complement(63084..64847)
CDS complement(63084..64847)
/product="Heat shock protein 10 kDa family chaperone GroES"
/translation="MMRHFITWLALWFFGAVGTVAQVAVPPQLIRPIQGAQLPSPLVQF
EWTPSSPSAPGLVYRLTVKPRYQGQSPTQAMASNPVSLQVDVPGTSYQTSLSEANALGA
DAAAPNYAGHVWHVQALLNGQPYGDNQGFSQIEGFSVPAMAVDPVKPPYAGLIWELPYT
ALIDGGAELTYDLPANVGDTLIMIVRVRVPQKLTEDTLALLQDTSNASPSARYTGYVLN
QAVASGAGRASGKTLGAVTRQAPPQGQGRGPVIPIRPSDVGLPEFRTSPGDTLDYYAGG
FYLYGRPGDTLVTDKEQEKRSYYAGGFYLYGGPGDTLVTDKEQETRSRYTGGYYVYGGP
GDTLVTDKEQEKRSYYAGGFYLYGGPGDTLVTDKEQETRSRYTGGFFVYTIPGNGEPPT
YAGYAKEYLIMRESDIYSIISKQAPVRVPVPEGSTTDFVSILKPAPKDTSKVKIKTVLP
PMEPYWWRQRSDTLTVPHTIFNPPDEILQGGLPLRQIAYNAGKEGAIIVERTGKAYVAG
HFVPHNILLPICPIAVQESDAFPEPLSDILVAVDEESGAIEYRWLVLRRELTQIQAVVR
LDCERDFYPIK"
gene complement(65230..66474)
/product="D-amino acid dehydrogenase (EC 1.4.99.6)"
/translation="MPSVVIVGGGAIGLASAFFLHQAGVGSITVLERGAIGNGCSYGNA
GLVSPSHVIPLAAPGVMRKGLRWLLNSRSPFYIRPRWDLDLFRWLWHFGRSATARHVQR
NAPVLKALLERSRTLTAMLQEKIGDFGYRSDGLLMVFQDEGYAECAALAQEAARLGMSC
EWVTKDRLIELAGTRVQAQGGLFFPGDAHLQPDRFTAALASFLTQHGVCCQSEVTVTEI
VRQGRRVRGLKTTAGFFEADVVVLATGAWSVELAQMVGYRLPLQPAKGYSLTFTPPPEG
MPQRPLLLTEAKVAVTPFSDALRLAGTLELAGIEQTIRPHRVEAIYRAAQQYLPMLRWP
VLETAKVWSGLRPCTPDGLPVVDWVPGSSNLLLATGHAMLGISLAAVTGELVAALVAGK
QPELDITPLRGDRWG"
/db_xref="SSO:000002003"
mRNA complement(65230..66474)
CDS complement(65230..66474)
/product="D-amino acid dehydrogenase (EC 1.4.99.6)"
/translation="MPSVVIVGGGAIGLASAFFLHQAGVGSITVLERGAIGNGCSYGNA
GLVSPSHVIPLAAPGVMRKGLRWLLNSRSPFYIRPRWDLDLFRWLWHFGRSATARHVQR
NAPVLKALLERSRTLTAMLQEKIGDFGYRSDGLLMVFQDEGYAECAALAQEAARLGMSC
EWVTKDRLIELAGTRVQAQGGLFFPGDAHLQPDRFTAALASFLTQHGVCCQSEVTVTEI
VRQGRRVRGLKTTAGFFEADVVVLATGAWSVELAQMVGYRLPLQPAKGYSLTFTPPPEG
MPQRPLLLTEAKVAVTPFSDALRLAGTLELAGIEQTIRPHRVEAIYRAAQQYLPMLRWP
VLETAKVWSGLRPCTPDGLPVVDWVPGSSNLLLATGHAMLGISLAAVTGELVAALVAGK
QPELDITPLRGDRWG"
/db_xref="SSO:000002003"
gene complement(66489..66830)
/product="Uncharacterized membrane protein PA1577"
/translation="MHPGLQTIGLLVLSNVFMTFAWYGHLRHLGDRPWYVAVVVSWSIA
LFEYMLQVPANRIGFTVFNLAQLKILQEVITLSVFIPFAVFYMQQPLRLNYLWAALCLL
GAVYFIFKG"
mRNA complement(66489..66830)
CDS complement(66489..66830)
/product="Uncharacterized membrane protein PA1577"
/translation="MHPGLQTIGLLVLSNVFMTFAWYGHLRHLGDRPWYVAVVVSWSIA
LFEYMLQVPANRIGFTVFNLAQLKILQEVITLSVFIPFAVFYMQQPLRLNYLWAALCLL
GAVYFIFKG"
gene 67068..68126
/product="Galactose-1-phosphate uridylyltransferase (EC
2.7.7.10)"
/translation="MACSLENYPHRRRNLLTGEWVLVSPHRAQRPWQGQLESLPVATRP
VYDPQCYLCPGNERAGGHRNPHYTETFVFDNDFAALRLDAPAAQETFGDLLEAHAERGL
CRVVCFSPRHDLTLAEMDTDAIRRVVEVWTTQHAELGSFPEIRYVQIFENKGEVMGCSN
PHPHGQIWAQETIPNEPWKETLQQQAYYNRTGNTLLGDYLALELRLGLRIVCENAHFVA
LVPYWAIWPFETLVVSRRPVPSLLELTEAERQGLADILKRLLVRYDNLFQVSFPYSAGF
HQAPTDGQQHPEWHLHLHVYPPLLRSATIRKFMVGYEMLAMPQRDLTPEAAAAQLRRLS
EIHFRTEPSVTA"
/db_xref="SSO:000003012"
mRNA 67068..68126
CDS 67068..68126
/product="Galactose-1-phosphate uridylyltransferase (EC
2.7.7.10)"
/translation="MACSLENYPHRRRNLLTGEWVLVSPHRAQRPWQGQLESLPVATRP
VYDPQCYLCPGNERAGGHRNPHYTETFVFDNDFAALRLDAPAAQETFGDLLEAHAERGL
CRVVCFSPRHDLTLAEMDTDAIRRVVEVWTTQHAELGSFPEIRYVQIFENKGEVMGCSN
PHPHGQIWAQETIPNEPWKETLQQQAYYNRTGNTLLGDYLALELRLGLRIVCENAHFVA
LVPYWAIWPFETLVVSRRPVPSLLELTEAERQGLADILKRLLVRYDNLFQVSFPYSAGF
HQAPTDGQQHPEWHLHLHVYPPLLRSATIRKFMVGYEMLAMPQRDLTPEAAAAQLRRLS
EIHFRTEPSVTA"
/db_xref="SSO:000003012"
gene 68132..69658
/product="Predicted sodium-dependent galactose transporter"
/translation="MFIWLDWIAFALFTALVIGISIYASRKEETGEDYFLAGRKLTWGI
IGFSLIAANISTEHFVGMAGRGFELGLAIASYEWMAAVTLVLVAFFFLPKFLQAGIYTM
PEYLEYRYNTAARTVMTVFMMLAYVFVALATVLYSGALAIEAIFGISTPKGIWIIGLLA
GIYTVYGGLKAVAWSEMLQCIMLLLGGLLVTVLGFQALGGVGVFFEQAGDKLHTVLPWD
HPEMPWVAVFIGGLWIPNLFYWGLNQFITQRTLGARSLKEGQKGILLAALLKLLIPFII
VFPGIMAALLYPNKVAQPDQAYPILIRELVPVGVRGFMLAALMGAVMSTLAALLNSAAT
IFTVDLYQRHWKRGQASPRQLVTIGRLATTAFMIFGCLWAPVVAKTGSVFQYIQMFWGF
ISPGITAAFLFGLFSKRTPPEAAIGAMFLGIPVYGLLLWKLPEVAFLHHMMITFLVLAA
FMLIVTKLRPLAEPPRLPNTPPISMETDPRLRWLGLGIVALTASLYLLFW"
/db_xref="SSO:000006293"
mRNA 68132..69658
CDS 68132..69658
/product="Predicted sodium-dependent galactose transporter"
/translation="MFIWLDWIAFALFTALVIGISIYASRKEETGEDYFLAGRKLTWGI
IGFSLIAANISTEHFVGMAGRGFELGLAIASYEWMAAVTLVLVAFFFLPKFLQAGIYTM
PEYLEYRYNTAARTVMTVFMMLAYVFVALATVLYSGALAIEAIFGISTPKGIWIIGLLA
GIYTVYGGLKAVAWSEMLQCIMLLLGGLLVTVLGFQALGGVGVFFEQAGDKLHTVLPWD
HPEMPWVAVFIGGLWIPNLFYWGLNQFITQRTLGARSLKEGQKGILLAALLKLLIPFII
VFPGIMAALLYPNKVAQPDQAYPILIRELVPVGVRGFMLAALMGAVMSTLAALLNSAAT
IFTVDLYQRHWKRGQASPRQLVTIGRLATTAFMIFGCLWAPVVAKTGSVFQYIQMFWGF
ISPGITAAFLFGLFSKRTPPEAAIGAMFLGIPVYGLLLWKLPEVAFLHHMMITFLVLAA
FMLIVTKLRPLAEPPRLPNTPPISMETDPRLRWLGLGIVALTASLYLLFW"
/db_xref="SSO:000006293"
gene 69676..70902
/product="Galactokinase (EC 2.7.1.6)"
/translation="MTRSLLMETVLNQLLTAFQHFFGDTRQVMVARAPGRVNLIGDHTD
YNDGFVLPMTLAQAVYMALRPRSDRNVRLYSLNFAEWATFSLDALPGKGTRWVHYIGGV
VAELHRRCLLPSGFEGVVYGDVPLGSGLSSSAALEVATLVTLQNMFGFAMSGEEAARLC
QHVEHTYVGVHCGIMDQFASRLGRAGHALFLDCRTLAYRHVPVQLTDWMFVIIDSQAPR
ALATSGYNERRAECEAGVAFFQSIDPSIRALRDVSPELLWAYPNHPSPLIWRRCRHVVE
ENRRVLEAVTDLEQGHLEDFGQCMNASHDSLRDLYEVSAFPLDLIVNVARSVEGVLGAR
LTGAGFGGCVVVLVHRDACSTLEACVRQAYEKHFGKQPAFYPLGHNITAEVLWRSASTD
SDGCASAIP"
/db_xref="SSO:000003006"
mRNA 69676..70902
CDS 69676..70902
/product="Galactokinase (EC 2.7.1.6)"
/translation="MTRSLLMETVLNQLLTAFQHFFGDTRQVMVARAPGRVNLIGDHTD
YNDGFVLPMTLAQAVYMALRPRSDRNVRLYSLNFAEWATFSLDALPGKGTRWVHYIGGV
VAELHRRCLLPSGFEGVVYGDVPLGSGLSSSAALEVATLVTLQNMFGFAMSGEEAARLC
QHVEHTYVGVHCGIMDQFASRLGRAGHALFLDCRTLAYRHVPVQLTDWMFVIIDSQAPR
ALATSGYNERRAECEAGVAFFQSIDPSIRALRDVSPELLWAYPNHPSPLIWRRCRHVVE
ENRRVLEAVTDLEQGHLEDFGQCMNASHDSLRDLYEVSAFPLDLIVNVARSVEGVLGAR
LTGAGFGGCVVVLVHRDACSTLEACVRQAYEKHFGKQPAFYPLGHNITAEVLWRSASTD
SDGCASAIP"
/db_xref="SSO:000003006"
gene complement(70899..73433)
/product="FIG01062198: hypothetical protein"
/translation="MAPRSAWFKGLLLCMSIASAYAQERASSLTYVDSQGVWRWVATDA
EVALFGVNYTTPFAHAYRAHQRRRVDLRRAIEADVAHLARLRLDAFRIHVWDREITDHR
GNLVENEHLDLLDYLIARLKAQGIAIVLTPIAWWGTGYPEPDPKTGGFSDNYTKCQLTA
DTLAWRIQANYLQQFIQHVNPYTGLSYRDDPDILAIEIFNEPCHRTAPDTTRLYINTLV
AALREAGLNKPIFYNISEGYHEAHGQAVCEADVQGITFQWYPTGLVRGRMLESNMLPNV
DRYLVPPAAFPACQNKTRMVYEFDAADVGGSYMYPAMARSFRAAGFQWATQFAYDPLFI
ADANTEYPTHYVNLVYTPSKAVSLMIAGEVFRQLPRGVSAGTYPESARFGPFWVDATQD
VSVMAADTVFYYTNTTSAMPPQPAQLRHIAGVGSSPVVDYEGTGAYFLDRLQPGLWRLE
VYPDAFWITDPFGATGLHRSVARLVARERRMRVRLPDLGLDFTVEPLNAGNTHRPAVHE
GTFGIRPGVYVLRARHVAVDAVALRPAPFYVPPIPEAPPLVVHTPPEVLVADTSAQLKV
QLVASWPVDSVWLYVRRAGWRGFQGVRMEALGGDRYRAVLPASVLRPGKLEYAVTLYQA
GNAYTFPGGEPRAPIDWDFAGRTFWQTILVAPGAPWVLFDAARDVTRLLLPRFRRDFRF
SVEAVPTDVPGQWALEVTTSGPDPESGVFAFRVERAMAAQLQQVAALRVRARALEGVQV
LELALVDDEGVAWAATLRLDSKWRDYTVPLRSLRPVPLVLLPRPYPQFLPYFLEATVRK
PHVDPARIAGIQVVVRPTGKAAFALGPVMLTP"
mRNA complement(70899..73433)
CDS complement(70899..73433)
/product="FIG01062198: hypothetical protein"
/translation="MAPRSAWFKGLLLCMSIASAYAQERASSLTYVDSQGVWRWVATDA
EVALFGVNYTTPFAHAYRAHQRRRVDLRRAIEADVAHLARLRLDAFRIHVWDREITDHR
GNLVENEHLDLLDYLIARLKAQGIAIVLTPIAWWGTGYPEPDPKTGGFSDNYTKCQLTA
DTLAWRIQANYLQQFIQHVNPYTGLSYRDDPDILAIEIFNEPCHRTAPDTTRLYINTLV
AALREAGLNKPIFYNISEGYHEAHGQAVCEADVQGITFQWYPTGLVRGRMLESNMLPNV
DRYLVPPAAFPACQNKTRMVYEFDAADVGGSYMYPAMARSFRAAGFQWATQFAYDPLFI
ADANTEYPTHYVNLVYTPSKAVSLMIAGEVFRQLPRGVSAGTYPESARFGPFWVDATQD
VSVMAADTVFYYTNTTSAMPPQPAQLRHIAGVGSSPVVDYEGTGAYFLDRLQPGLWRLE
VYPDAFWITDPFGATGLHRSVARLVARERRMRVRLPDLGLDFTVEPLNAGNTHRPAVHE
GTFGIRPGVYVLRARHVAVDAVALRPAPFYVPPIPEAPPLVVHTPPEVLVADTSAQLKV
QLVASWPVDSVWLYVRRAGWRGFQGVRMEALGGDRYRAVLPASVLRPGKLEYAVTLYQA
GNAYTFPGGEPRAPIDWDFAGRTFWQTILVAPGAPWVLFDAARDVTRLLLPRFRRDFRF
SVEAVPTDVPGQWALEVTTSGPDPESGVFAFRVERAMAAQLQQVAALRVRARALEGVQV
LELALVDDEGVAWAATLRLDSKWRDYTVPLRSLRPVPLVLLPRPYPQFLPYFLEATVRK
PHVDPARIAGIQVVVRPTGKAAFALGPVMLTP"
gene complement(73539..75470)
/product="Putative glycosyl hydrolase of unknown function
(DUF1680)"
/translation="MRAFFCLLVGITLWSSLSGTLRAQPLTKETDARYQERLRAFAFPF
EAVQLLDSPFKAAMQRDAAYLFSLDPDRLLSRFRRFAGLASKAPEYGGWESLGISGHTL
GHYLSALSMYYAATRDSLAKTRIAYIVQALAEVQQAHGNGYVGAIPEGERLWSEIARGE
LWETKPFSLNGAWVPWYTLHKLFAGLLDAYWYAASQQALQIAIGLADWVYETTKNLTPA
QWQQMLQTEHGGMNEVLAHLHGLTGNPRYRELSQKFYHATVLSPLARGVPNLTGLHANT
QIPKVIGVVRQYELIGSDSLRAIAEFFWEEVVQHHTYVIGGNSQNEHFGPRDSLSRRLD
ERTAETCNTYNMLRLTRHLFALNPEKVRYVDYYERALYNHILASQEPHKGMFTYFVSLR
PGHFKTYSTPEDAFWCCVGTGMENHVKYNEFIYFYNGDTLYVNLFIPSELTWKERALTV
RLETAFPESNQVRLKFNPEMTQRLVVRVRHPSWAQGSLEVRLNGEVQQLASHPGSYLTL
DRLWHPGDQLELTLPLRLHVETMPDNPDRFAILYGPIVLAGVFGNRGLPEGGAYARNQW
DFFNWPAPSVPRLCGDLNRVETWVKPLATSGELRFHTVGAGQPADVLLKPFYEVHHERY
TIYWDRCR"
mRNA complement(73539..75470)
CDS complement(73539..75470)
/product="Putative glycosyl hydrolase of unknown function
(DUF1680)"
/translation="MRAFFCLLVGITLWSSLSGTLRAQPLTKETDARYQERLRAFAFPF
EAVQLLDSPFKAAMQRDAAYLFSLDPDRLLSRFRRFAGLASKAPEYGGWESLGISGHTL
GHYLSALSMYYAATRDSLAKTRIAYIVQALAEVQQAHGNGYVGAIPEGERLWSEIARGE
LWETKPFSLNGAWVPWYTLHKLFAGLLDAYWYAASQQALQIAIGLADWVYETTKNLTPA
QWQQMLQTEHGGMNEVLAHLHGLTGNPRYRELSQKFYHATVLSPLARGVPNLTGLHANT
QIPKVIGVVRQYELIGSDSLRAIAEFFWEEVVQHHTYVIGGNSQNEHFGPRDSLSRRLD
ERTAETCNTYNMLRLTRHLFALNPEKVRYVDYYERALYNHILASQEPHKGMFTYFVSLR
PGHFKTYSTPEDAFWCCVGTGMENHVKYNEFIYFYNGDTLYVNLFIPSELTWKERALTV
RLETAFPESNQVRLKFNPEMTQRLVVRVRHPSWAQGSLEVRLNGEVQQLASHPGSYLTL
DRLWHPGDQLELTLPLRLHVETMPDNPDRFAILYGPIVLAGVFGNRGLPEGGAYARNQW
DFFNWPAPSVPRLCGDLNRVETWVKPLATSGELRFHTVGAGQPADVLLKPFYEVHHERY
TIYWDRCR"
gene complement(75473..78991)
/product="FIG01015257: hypothetical protein"
/translation="MGNSRSIAINLIVKLSSFLLILWGCRQGRPSQFVLRDPEESGLTF
QNTIHEDARHNLMTFFYLYNGGGVAVGDINNDGLPDLYVTGNMISGRLYLNRGNLRFED
ITERSGIVVTGWATGATFVDINEDGWLDLYICRSGMYPPEERANLLFINNGDLTFSEQA
SRYGIADTSYSTQAVFFDYDRDGYLDMYLLNHSMLDLQPNRIRPIDSTGYGIGNDRLYH
NEGNGTFRDVTLAAGIRYPGMGLGVVVGDVNRDGWDDIYVANDFMASDYLYLNQGNGTF
KEVGRQVFKHFSYSAMGVDLADINNDGWLDLVVVEMLPPDHDQRQRMAFPLTSFGYYQA
MLQEGYHYQYWRNTLQLNHGLNAQGKLTFSEVGQLAGIDATDWSWAPLLADFDHDGYRD
LWITNGYRRAVIDMDFIKDRMIPVLQQERRLGTDSVQRRLISMVRELYDLARPDAVFRN
RGDGTFALVSKAWGITDPSFSNGAAYADLDRDGDLDVIVNRIDQPIALYENRGGQGHYV
QLDLRGHPPNTRALGAWVEVYCDSLHWVQQHYVVRGYQSSVDYVMHLGLGSCAQIDSLK
VRWPNGQQTKWIRLPVDTLLVLHQPEGPGAFVKPPDIPQGLLVERTDRLPPYRHIEDLY
SDFIRQPLLPRTFSQLGPGLAVGDVNGDGREDFYVGGTYAQAGWLFLQQPEGFFKAGPI
DPTAMLEDQGALFFDADGDGDLDLLVASGSGEFPEGSDYLRDRLYRNDGQGQLIWDPLA
LPEARTSSSVVRAADFDQDGDLDLFIGGRMRPLRYPLPGRSYLLRNEGGRFVEVTNDIA
PGLGEAGMVNDALWSDYNNDGWPDLIVVGEFMPVRVWQNQEGRFREVTAALGLAHTHGW
WNSITGGDFDQDGDIDYVAGNTGLNSRFRASRQEPIRVYAADFDGNGLIDPIMTFYLQG
REVLVPRMDELFMQVLLPRALQVSSYATYARSHLRDLVYETQLKGAYVAVAYQLASSYL
ENQGDRFEVRPLPLAAQVAPIFGLLAEDVDGDGSLDLLAVGNDYATDVLTGRYDAFIGL
WLRGDGKGNLHPVSHRESGFFVDGDAKALVRLQVKNEPAYLVAQNQGPLHLLGYRSAPP
VSCWPWPSEAVYAQLHLPAGRVERRERYWGSGYLSQSSATLCVSKKVQQVTFHAAQGKT
VQQWVP"
mRNA complement(75473..78991)
CDS complement(75473..78991)
/product="FIG01015257: hypothetical protein"
/translation="MGNSRSIAINLIVKLSSFLLILWGCRQGRPSQFVLRDPEESGLTF
QNTIHEDARHNLMTFFYLYNGGGVAVGDINNDGLPDLYVTGNMISGRLYLNRGNLRFED
ITERSGIVVTGWATGATFVDINEDGWLDLYICRSGMYPPEERANLLFINNGDLTFSEQA
SRYGIADTSYSTQAVFFDYDRDGYLDMYLLNHSMLDLQPNRIRPIDSTGYGIGNDRLYH
NEGNGTFRDVTLAAGIRYPGMGLGVVVGDVNRDGWDDIYVANDFMASDYLYLNQGNGTF
KEVGRQVFKHFSYSAMGVDLADINNDGWLDLVVVEMLPPDHDQRQRMAFPLTSFGYYQA
MLQEGYHYQYWRNTLQLNHGLNAQGKLTFSEVGQLAGIDATDWSWAPLLADFDHDGYRD
LWITNGYRRAVIDMDFIKDRMIPVLQQERRLGTDSVQRRLISMVRELYDLARPDAVFRN
RGDGTFALVSKAWGITDPSFSNGAAYADLDRDGDLDVIVNRIDQPIALYENRGGQGHYV
QLDLRGHPPNTRALGAWVEVYCDSLHWVQQHYVVRGYQSSVDYVMHLGLGSCAQIDSLK
VRWPNGQQTKWIRLPVDTLLVLHQPEGPGAFVKPPDIPQGLLVERTDRLPPYRHIEDLY
SDFIRQPLLPRTFSQLGPGLAVGDVNGDGREDFYVGGTYAQAGWLFLQQPEGFFKAGPI
DPTAMLEDQGALFFDADGDGDLDLLVASGSGEFPEGSDYLRDRLYRNDGQGQLIWDPLA
LPEARTSSSVVRAADFDQDGDLDLFIGGRMRPLRYPLPGRSYLLRNEGGRFVEVTNDIA
PGLGEAGMVNDALWSDYNNDGWPDLIVVGEFMPVRVWQNQEGRFREVTAALGLAHTHGW
WNSITGGDFDQDGDIDYVAGNTGLNSRFRASRQEPIRVYAADFDGNGLIDPIMTFYLQG
REVLVPRMDELFMQVLLPRALQVSSYATYARSHLRDLVYETQLKGAYVAVAYQLASSYL
ENQGDRFEVRPLPLAAQVAPIFGLLAEDVDGDGSLDLLAVGNDYATDVLTGRYDAFIGL
WLRGDGKGNLHPVSHRESGFFVDGDAKALVRLQVKNEPAYLVAQNQGPLHLLGYRSAPP
VSCWPWPSEAVYAQLHLPAGRVERRERYWGSGYLSQSSATLCVSKKVQQVTFHAAQGKT
VQQWVP"
gene complement(78999..80354)
/product="Arabinan endo-1,5-alpha-L-arabinosidase (EC
3.2.1.99)"
/translation="MRCYKQTLLRWLAFLGVVGVSACADKGVEPELQEETCTASVADYT
PLVQVGDIAAHDPAAIYVEEEGAFYLFSTGHRIPIRRSTDLINWQLAGFVLPNDVPQWC
AQSIAGVQFPWAPDISFFNGKYYLYYACSGGQQHSAIGVATNVTLDPYSPNYRWEDQGK
VVETRPNQDPYGSIDPNFILDEEGNPWMVWGSYLRGIYLHRIDPATGKLLNPDYEHYTT
FYHLAERPIERAIEAPFIVRQGNYYYLFVSFDACCQGAASTYRVMVGRSVAITGPYVDQ
AGRSMLTGGGTLLLQSYGRIRGPGHNGVFRDGQGRWFFVHHFYDGLDGGRIKMQVRSLL
WRNGWPVVGEAYDGKYPGEALEVAALDLAGVWGYSVDYGQGVRLRLQDDGSLEQCGSNG
LWSRLGNWRVEGSELVLTVGSVEERLVLEPQGRWAVGRSQSGQVLRAWKTVS"
mRNA complement(78999..80354)
CDS complement(78999..80354)
/product="Arabinan endo-1,5-alpha-L-arabinosidase (EC
3.2.1.99)"
/translation="MRCYKQTLLRWLAFLGVVGVSACADKGVEPELQEETCTASVADYT
PLVQVGDIAAHDPAAIYVEEEGAFYLFSTGHRIPIRRSTDLINWQLAGFVLPNDVPQWC
AQSIAGVQFPWAPDISFFNGKYYLYYACSGGQQHSAIGVATNVTLDPYSPNYRWEDQGK
VVETRPNQDPYGSIDPNFILDEEGNPWMVWGSYLRGIYLHRIDPATGKLLNPDYEHYTT
FYHLAERPIERAIEAPFIVRQGNYYYLFVSFDACCQGAASTYRVMVGRSVAITGPYVDQ
AGRSMLTGGGTLLLQSYGRIRGPGHNGVFRDGQGRWFFVHHFYDGLDGGRIKMQVRSLL
WRNGWPVVGEAYDGKYPGEALEVAALDLAGVWGYSVDYGQGVRLRLQDDGSLEQCGSNG
LWSRLGNWRVEGSELVLTVGSVEERLVLEPQGRWAVGRSQSGQVLRAWKTVS"
gene complement(80375..81391)
/product="Arabinan endo-1,5-alpha-L-arabinosidase (EC
3.2.1.99)"
/translation="MEACVMHTMLIRYGWLVLLGAIGGKLGAQPIDIRVHDPVLIRQDS
FYYLFHTGRGISQWRSKDLRQWERLEPVFAEAPAWTEQVVPGFRQRNHIWAPDVLFYRG
RYYLFYSVSAFAKNTSAIGVATSLTLNPADPAYRWEDHGPVVRSVPGRDMWNAIDPNVV
FDEKGQPWLVFGSFWLGIKLVRLDTSLTRLAEPQEWYTVAARPRTMTLDERDPGDGAIE
APFLFRKGDFFYLFVSWDYCCRGVRSNYKIVVGRARDIRGPYLDREGRDMRQGGGTLVL
EGNERWPGVGHCAVYTFEGRDFLVFHGYDRLDEGRPKLWILPLLWDSEGWPLASLDD"
mRNA complement(80375..81391)
CDS complement(80375..81391)
/product="Arabinan endo-1,5-alpha-L-arabinosidase (EC
3.2.1.99)"
/translation="MEACVMHTMLIRYGWLVLLGAIGGKLGAQPIDIRVHDPVLIRQDS
FYYLFHTGRGISQWRSKDLRQWERLEPVFAEAPAWTEQVVPGFRQRNHIWAPDVLFYRG
RYYLFYSVSAFAKNTSAIGVATSLTLNPADPAYRWEDHGPVVRSVPGRDMWNAIDPNVV
FDEKGQPWLVFGSFWLGIKLVRLDTSLTRLAEPQEWYTVAARPRTMTLDERDPGDGAIE
APFLFRKGDFFYLFVSWDYCCRGVRSNYKIVVGRARDIRGPYLDREGRDMRQGGGTLVL
EGNERWPGVGHCAVYTFEGRDFLVFHGYDRLDEGRPKLWILPLLWDSEGWPLASLDD"
gene complement(81456..83042)
/product="alpha-L-arabinofuranosidase (EC 3.2.1.55)"
/translation="MRYRHLVCFIGLVLGLGLAMPTSAQQARIKIDPDRVIDKVDPLIY
GSFVEHLGRCVYGGIYEPGSPLADEDGLRRDVLQAVRELGVTILRYPGGNFVSNYHWLD
GVGPERKPRLDLAWHVLEPNTFGTNEFMKFIRKVGAEPYFTVNMGTGTIEEAQWWVEYT
NVKEGPYYAELRKQHGFPEPYGIKFWSLGNEMDGFWQLGHLSAEDYAKKAREAAKLMKA
TDPSIRLIAAGSSDFRPGADPQHWNRVVLEELKDHIDYIALHIYVGNPDNNYYNFVATP
LEMERRTAIVKGLIQQVLWGSRRERPIYIAWDEYNVWYRARTGEALRGRRALEERYNLE
DALVIAGFLNGFIRQADIVKMANLAQLVNVIAPIFTNEQGLFKQTIYYPFQLFARNAHG
TALDVFVDSPTYDTEEFFLGLGERTTKLENVPYLDVSAVYNEENGRLVINVVNRHKDQP
ITTELIAQEGRFRGPFEVYEVNGPDIKAENDFGIERVKTVRKPDVSANGTRFTYTFPPH
SFTQLIGRLER"
mRNA complement(81456..83042)
CDS complement(81456..83042)
/product="alpha-L-arabinofuranosidase (EC 3.2.1.55)"
/translation="MRYRHLVCFIGLVLGLGLAMPTSAQQARIKIDPDRVIDKVDPLIY
GSFVEHLGRCVYGGIYEPGSPLADEDGLRRDVLQAVRELGVTILRYPGGNFVSNYHWLD
GVGPERKPRLDLAWHVLEPNTFGTNEFMKFIRKVGAEPYFTVNMGTGTIEEAQWWVEYT
NVKEGPYYAELRKQHGFPEPYGIKFWSLGNEMDGFWQLGHLSAEDYAKKAREAAKLMKA
TDPSIRLIAAGSSDFRPGADPQHWNRVVLEELKDHIDYIALHIYVGNPDNNYYNFVATP
LEMERRTAIVKGLIQQVLWGSRRERPIYIAWDEYNVWYRARTGEALRGRRALEERYNLE
DALVIAGFLNGFIRQADIVKMANLAQLVNVIAPIFTNEQGLFKQTIYYPFQLFARNAHG
TALDVFVDSPTYDTEEFFLGLGERTTKLENVPYLDVSAVYNEENGRLVINVVNRHKDQP
ITTELIAQEGRFRGPFEVYEVNGPDIKAENDFGIERVKTVRKPDVSANGTRFTYTFPPH
SFTQLIGRLER"
gene complement(83123..84655)
/product="Cell surface glycan-binding lipoprotein,
utilization system for glycans and polysaccharides (PUL),
SusD family"
/translation="MKAAQTLLLLLLCGGLMVGCDGNFLELTNPNLPTTDTFWKTADDA
IKAVNACYEPLTFDGMYGRFMHILQDLRADDAVGDSPWGEIQNVGRFNLNAASFGPFLA
WRDAYNGIYRTNQVLKYVPNIEMDPELKARLLGEAKFLRAFYYFHLVKMFNNVPLILEP
AEKEEQYRQPQAPPEQVWAQIIQDLKEAQTVLPQRYTNEADIGRATWGAATAYLGVAYL
FTGRYAEADAEFKKIIDSGLYQLVDDPRLNGGYEGENNAESIFEIQFSREVGGTVPGWG
GTPNPSWGETQARSITYSPPGFGWADTNPTRCLYQTFKQERTVDGQDDPRLHATMFYYR
PGMTVYGVPWEQLYGNDTTSVYWRKYQSDIPGGNEFDMRSGINIRVMRYADVLLMYAET
RNELGDQATAARYIQMVRNRARLPNREAEFAAMSQAQLREVIARERFLELAGEGKRFDD
LRRWGWLSNPAKLAELRACDPEFNGYAPGREWLPIPQAEMDANPLLQQNPSY"
mRNA complement(83123..84655)
CDS complement(83123..84655)
/product="Cell surface glycan-binding lipoprotein,
utilization system for glycans and polysaccharides (PUL),
SusD family"
/translation="MKAAQTLLLLLLCGGLMVGCDGNFLELTNPNLPTTDTFWKTADDA
IKAVNACYEPLTFDGMYGRFMHILQDLRADDAVGDSPWGEIQNVGRFNLNAASFGPFLA
WRDAYNGIYRTNQVLKYVPNIEMDPELKARLLGEAKFLRAFYYFHLVKMFNNVPLILEP
AEKEEQYRQPQAPPEQVWAQIIQDLKEAQTVLPQRYTNEADIGRATWGAATAYLGVAYL
FTGRYAEADAEFKKIIDSGLYQLVDDPRLNGGYEGENNAESIFEIQFSREVGGTVPGWG
GTPNPSWGETQARSITYSPPGFGWADTNPTRCLYQTFKQERTVDGQDDPRLHATMFYYR
PGMTVYGVPWEQLYGNDTTSVYWRKYQSDIPGGNEFDMRSGINIRVMRYADVLLMYAET
RNELGDQATAARYIQMVRNRARLPNREAEFAAMSQAQLREVIARERFLELAGEGKRFDD
LRRWGWLSNPAKLAELRACDPEFNGYAPGREWLPIPQAEMDANPLLQQNPSY"
gene complement(84706..87753)
/product="Outer membrane TonB-dependent transporter,
utilization system for glycans and polysaccharides (PUL),
SusC family"
/translation="MGMVGLFWFFGSANVWAQQQVSGTVRDAASGEPLPGVNVVVKGTT
LGAATDLDGRYRLVVPSLQDTLVFSFVGYETREEPIAGRSVVDVRLVPTVLRGEEVVVI
GYGTQRRVDLTGAVAVADPAELKKLSTPTLAGALQGQLAGVAVTSSGAPGETPEVRIRG
ITSFGSNEPLYIVDGVPVDRIIDLNISDIESVQVLKDAAAAAIYGTRAANGVVIITTRR
GQRGLRVEYEGSVGAANIYQRWDVLEREEYQALMNEMDANAGRPPAPANDPSSPFYVDD
VDTDWQDAAFKPGLMTSHNLTVSGGGEVSTYSIAGGYLRQEPTMVGNAPSFERVSLRVN
SDHRRGRFSFGESIYLVHTKTMRQETRHEESIIRNTLVAIPTLPIHDPNRKGGYAGADA
NIHRAISLNVVGVNNLIESPVDAYRGLLNLYGQIDLFSGLSYKINTAVDVTESEDYLFV
PQFDMGYFFTEQNGTLDYFKRRYVYWLLEHTLTYDRVFGRHHFTLLGGATWEKGNYVHT
GGNAQGYANSNFKTLEAGSNPNKTVFHWKSANALQSFLGRLNYNFADRYLLSATIRRDG
SSRFGRNNRYGIFPSISAGWRVSNEPFFDIPFINDLKIRGSWGRLGNQNIDDYATAAVV
NTYAHYNFNDNLAPGAIQVTLVNPNMKWETTTSWDVGIDATLFDARLQLTVDYYDKTTD
GILVRVPIPLSVGSTENPLVNAASLKNWGWEFSATYRGQRGSLNYELWGNLTTWNNKVL
SLGYGGEPIYGFASITQEGGEIGAIYGWVTNGIFQSEDEICRDATGATCRERGLAYQTP
GTAPGDIRFKDLNGDGIINDQDRTVLGSAIPDFYYGWGFRLNYRQWDFSLLAQGTYGNK
IFNHPRRMLEAGFQQAYGNAAETVKDHWRPDNPDAKMPRVIYLDPNGNGRDSDRWVEDG
SYLRVQNVTLGYTLPASLASRLGMVSLRVYVSAENLFTLTGYSGLDPDLGDDGAQVEND
ALFSRGTDTGAWPHPRIIRAGVQLSF"
mRNA complement(84706..87753)
CDS complement(84706..87753)
/product="Outer membrane TonB-dependent transporter,
utilization system for glycans and polysaccharides (PUL),
SusC family"
/translation="MGMVGLFWFFGSANVWAQQQVSGTVRDAASGEPLPGVNVVVKGTT
LGAATDLDGRYRLVVPSLQDTLVFSFVGYETREEPIAGRSVVDVRLVPTVLRGEEVVVI
GYGTQRRVDLTGAVAVADPAELKKLSTPTLAGALQGQLAGVAVTSSGAPGETPEVRIRG
ITSFGSNEPLYIVDGVPVDRIIDLNISDIESVQVLKDAAAAAIYGTRAANGVVIITTRR
GQRGLRVEYEGSVGAANIYQRWDVLEREEYQALMNEMDANAGRPPAPANDPSSPFYVDD
VDTDWQDAAFKPGLMTSHNLTVSGGGEVSTYSIAGGYLRQEPTMVGNAPSFERVSLRVN
SDHRRGRFSFGESIYLVHTKTMRQETRHEESIIRNTLVAIPTLPIHDPNRKGGYAGADA
NIHRAISLNVVGVNNLIESPVDAYRGLLNLYGQIDLFSGLSYKINTAVDVTESEDYLFV
PQFDMGYFFTEQNGTLDYFKRRYVYWLLEHTLTYDRVFGRHHFTLLGGATWEKGNYVHT
GGNAQGYANSNFKTLEAGSNPNKTVFHWKSANALQSFLGRLNYNFADRYLLSATIRRDG
SSRFGRNNRYGIFPSISAGWRVSNEPFFDIPFINDLKIRGSWGRLGNQNIDDYATAAVV
NTYAHYNFNDNLAPGAIQVTLVNPNMKWETTTSWDVGIDATLFDARLQLTVDYYDKTTD
GILVRVPIPLSVGSTENPLVNAASLKNWGWEFSATYRGQRGSLNYELWGNLTTWNNKVL
SLGYGGEPIYGFASITQEGGEIGAIYGWVTNGIFQSEDEICRDATGATCRERGLAYQTP
GTAPGDIRFKDLNGDGIINDQDRTVLGSAIPDFYYGWGFRLNYRQWDFSLLAQGTYGNK
IFNHPRRMLEAGFQQAYGNAAETVKDHWRPDNPDAKMPRVIYLDPNGNGRDSDRWVEDG
SYLRVQNVTLGYTLPASLASRLGMVSLRVYVSAENLFTLTGYSGLDPDLGDDGAQVEND
ALFSRGTDTGAWPHPRIIRAGVQLSF"
gene 88135..89193
/product="Transcriptional regulator, LacI family"
/translation="MPAEPTPPKRVTISDVARYAGVSNATVSAVLNNKSTVKDTTRRRV
LEAIEKLNYRPSGAARRRLQPTLHRTIGLVVKEVDNPYFADIFLGAREVASRHGYTVLI
TSSESDFASEHRIVDLLADKDVDGLIINPLLEEQADLSHLFELKRRHIPFVLIENVLGL
QANIVDVDNVAASKEATRYLIEGGHERIIHFAGPRYSLHTEERIEGFRRAFSESNLIFR
EDMIVYTGARLRDGYEKGLEYFQQHHNNLPTAVTCYNDLVAIGLMRALHYLGIKVPDQV
SIIGYDDIAIAEYLPIPLTTVRMPKIEMGAKAAELLIRQIEGANGRGGPDTVERIILPA
QLIVRASTRLLK"
mRNA 88135..89193
CDS 88135..89193
/product="Transcriptional regulator, LacI family"
/translation="MPAEPTPPKRVTISDVARYAGVSNATVSAVLNNKSTVKDTTRRRV
LEAIEKLNYRPSGAARRRLQPTLHRTIGLVVKEVDNPYFADIFLGAREVASRHGYTVLI
TSSESDFASEHRIVDLLADKDVDGLIINPLLEEQADLSHLFELKRRHIPFVLIENVLGL
QANIVDVDNVAASKEATRYLIEGGHERIIHFAGPRYSLHTEERIEGFRRAFSESNLIFR
EDMIVYTGARLRDGYEKGLEYFQQHHNNLPTAVTCYNDLVAIGLMRALHYLGIKVPDQV
SIIGYDDIAIAEYLPIPLTTVRMPKIEMGAKAAELLIRQIEGANGRGGPDTVERIILPA
QLIVRASTRLLK"
gene complement(89159..91135)
/product="alpha-glucosidase"
/translation="MGPWAYRLLLGWLCLGWIAACRPAEEGIKSPDGRLEVRVAVVEGV
VYYQIFRDGQPVLEPSRLGLLRSDGDFRQNLQLETVSPIVPIEERYTLRVGKRRVNRYV
AHERTYRFRNAMGQQIELCFRVSNDGVAFRYRFPERDAAPREILEELTTFDFPDSARAW
LQPLAEPKSGWRQTNPSYEEYYLQDIPVGTPSPTGAGWVFPALFRVGAHWVLLTEADVD
STFCGARLRAEAPGGAYQIGYPDAREAIPGQGYLPRSPLPWQTPWRVLVVGDLKTLVES
TLGTDLAAPAIALDTTFVRPGRASWSWGLLKDSSITYEVQHRFIDYAAKMGWEYTLIDV
NWDSTIGYDRLAELARYAATQGVGLWLWYNASGDWNTTTYRPKSRLLTREDRQREFARL
AAMGIRGVKVDFFGGDGRSMIRYYHEILQDAAAYRLMVNFHGCTLPRGWARTYPHLMTM
EAVRGFEFVTFTQADADREANHAAMLPFTRNVFDPMDYTPLSLSSIPGILRQTRQGFQL
ALTVLFTSGVQHFVETPEGMAHVPEAVQRFLRTVPVAWEETRFVAGWPGKFVILARKDA
NGRWYVAGINGEAQEKVLEFTLPFLEGSPTGALFIDAPQRDLLLHVPLRYERVQRLTLP
PHGGFVIVWEPQVTLADELRPER"
mRNA complement(89159..91135)
CDS complement(89159..91135)
/product="alpha-glucosidase"
/translation="MGPWAYRLLLGWLCLGWIAACRPAEEGIKSPDGRLEVRVAVVEGV
VYYQIFRDGQPVLEPSRLGLLRSDGDFRQNLQLETVSPIVPIEERYTLRVGKRRVNRYV
AHERTYRFRNAMGQQIELCFRVSNDGVAFRYRFPERDAAPREILEELTTFDFPDSARAW
LQPLAEPKSGWRQTNPSYEEYYLQDIPVGTPSPTGAGWVFPALFRVGAHWVLLTEADVD
STFCGARLRAEAPGGAYQIGYPDAREAIPGQGYLPRSPLPWQTPWRVLVVGDLKTLVES
TLGTDLAAPAIALDTTFVRPGRASWSWGLLKDSSITYEVQHRFIDYAAKMGWEYTLIDV
NWDSTIGYDRLAELARYAATQGVGLWLWYNASGDWNTTTYRPKSRLLTREDRQREFARL
AAMGIRGVKVDFFGGDGRSMIRYYHEILQDAAAYRLMVNFHGCTLPRGWARTYPHLMTM
EAVRGFEFVTFTQADADREANHAAMLPFTRNVFDPMDYTPLSLSSIPGILRQTRQGFQL
ALTVLFTSGVQHFVETPEGMAHVPEAVQRFLRTVPVAWEETRFVAGWPGKFVILARKDA
NGRWYVAGINGEAQEKVLEFTLPFLEGSPTGALFIDAPQRDLLLHVPLRYERVQRLTLP
PHGGFVIVWEPQVTLADELRPER"
gene complement(91141..92727)
/product="alpha-L-arabinofuranosidase (EC 3.2.1.55)"
/translation="MMRTRLLVGVLLCLGLSPHAVLRAQEALPTHQLVIYADQGQVQIS
RHIYGHFIEHLGYGIYGGFWQRDAQGRWHLRQDIIEALRHIRIPNLRWPGGCFADLYHW
KDGIGPREQRPPILNAFWGQVVEDNSFGTHEFMELIEALGAEPYIAGNVGSGTPREMAE
WVEYLTAEDGPMARLRKQNGREKPWRVPFWGVGNESWGCGGHMDPEHYADLYRRFATYL
FNYSGNQLYKVAAGPADADTTWTSVLMRHVFRRYPWLMQGISVHYYTWISKTGNWNDKE
PAVGFDEWGWFQGLKKGLFLDNVLRGHKAVMDRYDPEKRVGLVVDEWGMWHAPEPGSNP
AFLVQQNTLRDALVAAVSLNIFNHHADRVKMANLAQTINVLQALILTREGEDTIVRTPT
YHVFDLYKEHQDATLVPIALEAGEYRYGNEAIPALNASASRNAEGAVHLTIANLDPHQE
RVVHCRLEGARPARVVGRVLTADAMDAHNTFEAPNRVQPTAFTGYRQLGNGVYELRLPA
KSVVALTFYPN"
mRNA complement(91141..92727)
CDS complement(91141..92727)
/product="alpha-L-arabinofuranosidase (EC 3.2.1.55)"
/translation="MMRTRLLVGVLLCLGLSPHAVLRAQEALPTHQLVIYADQGQVQIS
RHIYGHFIEHLGYGIYGGFWQRDAQGRWHLRQDIIEALRHIRIPNLRWPGGCFADLYHW
KDGIGPREQRPPILNAFWGQVVEDNSFGTHEFMELIEALGAEPYIAGNVGSGTPREMAE
WVEYLTAEDGPMARLRKQNGREKPWRVPFWGVGNESWGCGGHMDPEHYADLYRRFATYL
FNYSGNQLYKVAAGPADADTTWTSVLMRHVFRRYPWLMQGISVHYYTWISKTGNWNDKE
PAVGFDEWGWFQGLKKGLFLDNVLRGHKAVMDRYDPEKRVGLVVDEWGMWHAPEPGSNP
AFLVQQNTLRDALVAAVSLNIFNHHADRVKMANLAQTINVLQALILTREGEDTIVRTPT
YHVFDLYKEHQDATLVPIALEAGEYRYGNEAIPALNASASRNAEGAVHLTIANLDPHQE
RVVHCRLEGARPARVVGRVLTADAMDAHNTFEAPNRVQPTAFTGYRQLGNGVYELRLPA
KSVVALTFYPN"
gene complement(92766..93917)
/product="Aldose 1-epimerase (EC 5.1.3.3)"
/translation="MKNWVWICLGGWLLGCHAPSHETSSSVETTALSVSRSTFGQLPDG
RMVELFQLRNAAGMEVEVINYGAIIRALRVPDRAGILGDVVLGFDSLSGYLQPHPYMGA
VVGRYANRIGGARFVLEGTTYELAANDGPNHLHGGIKGFDKVLWQAEPFSNGTESGVRF
TYVSPDGEEGYPGTLHVAVTYTLTDTNALVIDYEATTDKPTIVNLTQHAYFNLAGQGDI
LNHELQIFADFFTPVDERLIPTGEILSVAGTPFDFRQAQRIGARIHAADVQLQRGRGYD
HNFVLQRRERGTLELAARVYEPTTGRVMTVYTTEPGLQFYSGNFLDGSLQGKGGRVYAL
RTGFCLETQHFPDSPNKTHFPSPVLRPGETYRSRTVYAFSVLQ"
/db_xref="SSO:000000870"
mRNA complement(92766..93917)
CDS complement(92766..93917)
/product="Aldose 1-epimerase (EC 5.1.3.3)"
/translation="MKNWVWICLGGWLLGCHAPSHETSSSVETTALSVSRSTFGQLPDG
RMVELFQLRNAAGMEVEVINYGAIIRALRVPDRAGILGDVVLGFDSLSGYLQPHPYMGA
VVGRYANRIGGARFVLEGTTYELAANDGPNHLHGGIKGFDKVLWQAEPFSNGTESGVRF
TYVSPDGEEGYPGTLHVAVTYTLTDTNALVIDYEATTDKPTIVNLTQHAYFNLAGQGDI
LNHELQIFADFFTPVDERLIPTGEILSVAGTPFDFRQAQRIGARIHAADVQLQRGRGYD
HNFVLQRRERGTLELAARVYEPTTGRVMTVYTTEPGLQFYSGNFLDGSLQGKGGRVYAL
RTGFCLETQHFPDSPNKTHFPSPVLRPGETYRSRTVYAFSVLQ"
/db_xref="SSO:000000870"
gene complement(94091..96181)
/product="Oligopeptide transporter, OPT family"
/translation="MPEAFFASRAAVWGFKALLRIFVARFLQSDPAMEPAAMPPSSSGP
YVAPERSLPEITLKALILGVVLAAVLAAANAYLGLKVGMTVSASIPAAVISMGVFRLFR
RANILENNIVQTAASAGEAIAAGVIFTLPALILLGYWQGFPYLDTLAVAATGGVLGVLF
TIPLRRALIVEGGLRFPEGIATAEVLIVGGQGGRGVRDIALAAVVGGLVKLLQTGFRVF
AGTVDAAVQVGRALFGFGSELGVALLAVGYIVGLRIATLVFAGGLVAWLFGIPLYTALQ
GLPQGVVGYEAALQVWSSKIRYLGVGAMAVGGIWALLSLLKPLRDGVRASWQAFRAVGQ
GQQTAVPRTERDTPIPFVLIGTLVLILPLSVVFLHVIDAPSLGLFGGAYGMTIVFAVLF
ALIAGFLFSSVAAYMAGLVGSSNNPISGVTIATILTAALLLLLLLGQGFGVRIDASRAV
TAAATTILIGAVVCCAAAIAGDNMQDLKTGYLVGATPYKQQIMQIVGTLTGALVVAPVL
ELLFNAYGLGGVLPRPNMDPGQMLAAPQASLMQSVAQGVFNRSLDWTIIGLGATLAVAI
IAADQWLKARGSSFRMPVLAVAVGIYLPLELSVPIFVGGWVAYMAGKARSGAESSRGVL
FASGLITGEALMGILLAVPFALAQSTEVLRLVPEEFAPMSQALGVLAFLGVALWLYRVA
RA"
mRNA complement(94091..96181)
CDS complement(94091..96181)
/product="Oligopeptide transporter, OPT family"
/translation="MPEAFFASRAAVWGFKALLRIFVARFLQSDPAMEPAAMPPSSSGP
YVAPERSLPEITLKALILGVVLAAVLAAANAYLGLKVGMTVSASIPAAVISMGVFRLFR
RANILENNIVQTAASAGEAIAAGVIFTLPALILLGYWQGFPYLDTLAVAATGGVLGVLF
TIPLRRALIVEGGLRFPEGIATAEVLIVGGQGGRGVRDIALAAVVGGLVKLLQTGFRVF
AGTVDAAVQVGRALFGFGSELGVALLAVGYIVGLRIATLVFAGGLVAWLFGIPLYTALQ
GLPQGVVGYEAALQVWSSKIRYLGVGAMAVGGIWALLSLLKPLRDGVRASWQAFRAVGQ
GQQTAVPRTERDTPIPFVLIGTLVLILPLSVVFLHVIDAPSLGLFGGAYGMTIVFAVLF
ALIAGFLFSSVAAYMAGLVGSSNNPISGVTIATILTAALLLLLLLGQGFGVRIDASRAV
TAAATTILIGAVVCCAAAIAGDNMQDLKTGYLVGATPYKQQIMQIVGTLTGALVVAPVL
ELLFNAYGLGGVLPRPNMDPGQMLAAPQASLMQSVAQGVFNRSLDWTIIGLGATLAVAI
IAADQWLKARGSSFRMPVLAVAVGIYLPLELSVPIFVGGWVAYMAGKARSGAESSRGVL
FASGLITGEALMGILLAVPFALAQSTEVLRLVPEEFAPMSQALGVLAFLGVALWLYRVA
RA"
gene 96229..96912
/product="Metal-dependent hydrolase"
/translation="MKLTYFGHSAFQIETNGTTLLFDPFITGNPHTQGIVTAAQLRPDV
ILLTHAHGDHWGDALEIARRTNALLVANFEITQYAQKHGHRNVHPMNTGGSWQFPWGRV
TQTYARHSSSFPDGTYGGNPNGYILELEGKVIYDLGDTCPFAEMAWYGEDYAIDVALMP
VGDLFTMGTEGAVRAAKMLKPKLIIPIHYNTFPPIQIDIEQCRQRLEQEGFTMRVLKPG
ESLVI"
mRNA 96229..96912
CDS 96229..96912
/product="Metal-dependent hydrolase"
/translation="MKLTYFGHSAFQIETNGTTLLFDPFITGNPHTQGIVTAAQLRPDV
ILLTHAHGDHWGDALEIARRTNALLVANFEITQYAQKHGHRNVHPMNTGGSWQFPWGRV
TQTYARHSSSFPDGTYGGNPNGYILELEGKVIYDLGDTCPFAEMAWYGEDYAIDVALMP
VGDLFTMGTEGAVRAAKMLKPKLIIPIHYNTFPPIQIDIEQCRQRLEQEGFTMRVLKPG
ESLVI"
gene 97010..97987
/product="Adenylate cyclase (EC 4.6.1.1)"
/translation="MHRLKLQALVRWPRLGGVCLLLGAGLTATATAQHPTRTSDALYQG
ESARRVFFDGYAVSTELYCCARALNPEGGPTSSGLFGLPIGLRFHLTYALSDVLDIGTV
LNASSGTSGGTMSLDWILLKYYQTADEGSYAIRLAVDPSLDGSLGFPQIDLALLTSSLL
SPVVAATYALGLRRVRAGYERWTPLQAEEPTEVPLITEPLPRFEITYLRAFGWELHLMM
QYALLLNPARSNVFVGMTGSARHYTLMESDRETREVRAGKRSDEAPVGESTYSGGILWM
RGGVEYNRPSYQLSPFVGLPLLFWSSETDESSPRLLAGLRLTLR"
/db_xref="SSO:000000819"
mRNA 97010..97987
CDS 97010..97987
/product="Adenylate cyclase (EC 4.6.1.1)"
/translation="MHRLKLQALVRWPRLGGVCLLLGAGLTATATAQHPTRTSDALYQG
ESARRVFFDGYAVSTELYCCARALNPEGGPTSSGLFGLPIGLRFHLTYALSDVLDIGTV
LNASSGTSGGTMSLDWILLKYYQTADEGSYAIRLAVDPSLDGSLGFPQIDLALLTSSLL
SPVVAATYALGLRRVRAGYERWTPLQAEEPTEVPLITEPLPRFEITYLRAFGWELHLMM
QYALLLNPARSNVFVGMTGSARHYTLMESDRETREVRAGKRSDEAPVGESTYSGGILWM
RGGVEYNRPSYQLSPFVGLPLLFWSSETDESSPRLLAGLRLTLR"
/db_xref="SSO:000000819"
gene complement(97990..99684)
/product="serine phosphatase"
/translation="MTDRFDLRALYEASRLLSTSGDRNAIVRTLLLSALSKLLVTRGVV
LLWEPLVQRFRVADVRGPVGMAPGEELTLPQPVADRLLLEAEVPEVLRQRSLCLVVPLM
FRHRLLGLLSLGRKATGEGFSKRELEFIQALATLSAAALHNALLIEELQQANRDLDLRL
QQLNTLFELAQEFNATIDREQLAHLLSLALMGQLLVNRYVLLIRLEGTERPSSFQVLAA
RGLPTTLRSEQIEHLARLEHPLLLEDAPPVWDWLRALQLYLILPIRQQGETQAILGLGR
RMNNLPYGPEEVEFLYALGTLAATAIRNTLLVEVQVEKRRLEREMQLARQIQQRLLPRQ
LPQVPGVELAACARTSQQVGGDYYDVLQEPGGSLRLAIADVTGKGLPAALLMANLQACL
HMAVPLALSLETSTVHINRVVCENTEADRFITFFQARYEPTTRQLVYVNAGHNPPLLLR
ASGEVLSLTHGGLLLGVFPQAHYEAEQLSLTPGDVLVLYTDGVTEVANAKEELFGEKRL
LACLETHRNASAQAIVEAVRQAVEAFTGREAGYEDDFTLLVLKIVPL"
mRNA complement(97990..99684)
CDS complement(97990..99684)
/product="serine phosphatase"
/translation="MTDRFDLRALYEASRLLSTSGDRNAIVRTLLLSALSKLLVTRGVV
LLWEPLVQRFRVADVRGPVGMAPGEELTLPQPVADRLLLEAEVPEVLRQRSLCLVVPLM
FRHRLLGLLSLGRKATGEGFSKRELEFIQALATLSAAALHNALLIEELQQANRDLDLRL
QQLNTLFELAQEFNATIDREQLAHLLSLALMGQLLVNRYVLLIRLEGTERPSSFQVLAA
RGLPTTLRSEQIEHLARLEHPLLLEDAPPVWDWLRALQLYLILPIRQQGETQAILGLGR
RMNNLPYGPEEVEFLYALGTLAATAIRNTLLVEVQVEKRRLEREMQLARQIQQRLLPRQ
LPQVPGVELAACARTSQQVGGDYYDVLQEPGGSLRLAIADVTGKGLPAALLMANLQACL
HMAVPLALSLETSTVHINRVVCENTEADRFITFFQARYEPTTRQLVYVNAGHNPPLLLR
ASGEVLSLTHGGLLLGVFPQAHYEAEQLSLTPGDVLVLYTDGVTEVANAKEELFGEKRL
LACLETHRNASAQAIVEAVRQAVEAFTGREAGYEDDFTLLVLKIVPL"
gene complement(99681..100187)
/product="hypothetical protein"
/translation="MLLGILSDTHGFFHPALPEVLRGAHLILHAGDVGGLEILERLKEI
APVQAVYGNIDSPELRRRLPEQVDLTLEGLRFWMTHIGGHPGRWARGVGPKLRKDRPDV
FICGHSHILQIERVPSLGGMLYINPGAAGREGPHRIKTCVRLYVAEGRALKAEVVHLDE
EKFGT"
/db_xref="SSO:000009137"
mRNA complement(99681..100187)
CDS complement(99681..100187)
/product="hypothetical protein"
/translation="MLLGILSDTHGFFHPALPEVLRGAHLILHAGDVGGLEILERLKEI
APVQAVYGNIDSPELRRRLPEQVDLTLEGLRFWMTHIGGHPGRWARGVGPKLRKDRPDV
FICGHSHILQIERVPSLGGMLYINPGAAGREGPHRIKTCVRLYVAEGRALKAEVVHLDE
EKFGT"
/db_xref="SSO:000009137"
gene complement(100287..101546)
/product="Glucose-1-phosphate thymidylyltransferase (EC
2.7.7.24)"
/translation="MSWSICVFEDEGVAHLAPLIHTRPVYDLRLGLPTLLERTLRLLQA
PAVCLHARASVAPVAARLYHFPVNPNNIEKGLLLWNGRVVAESNEVLERIRRAAADREP
SRVFVQGDAVVAAWFPEGLKRALPAALLSRQWLDDGPEERVEGVRFIGRLWHLIDWMER
EFAGDQATWTALGQTEVGVTIQPGAVLVERSQIALKRGAVVRAGAILNATDGPIYVGPG
AIVSEGAVVVGPVAIGEGAEVRVGAHLRNCVVGPYVKLGGEVHTSIVHSYSNKAHDGFL
GHAYIGRWCNLGAGTTASNLRNDYGPVTLYNEALGMFESSGRQFLGVFIGDHTKTSIGT
TFNTGTVVGVSCNLYGPGFHARYVPSFSWGSPSEGYVPFRLEKALRVAEAVMARRQHRL
DEAERLALTAVFEAIHADKT"
/db_xref="SSO:000003126"
mRNA complement(100287..101546)
CDS complement(100287..101546)
/product="Glucose-1-phosphate thymidylyltransferase (EC
2.7.7.24)"
/translation="MSWSICVFEDEGVAHLAPLIHTRPVYDLRLGLPTLLERTLRLLQA
PAVCLHARASVAPVAARLYHFPVNPNNIEKGLLLWNGRVVAESNEVLERIRRAAADREP
SRVFVQGDAVVAAWFPEGLKRALPAALLSRQWLDDGPEERVEGVRFIGRLWHLIDWMER
EFAGDQATWTALGQTEVGVTIQPGAVLVERSQIALKRGAVVRAGAILNATDGPIYVGPG
AIVSEGAVVVGPVAIGEGAEVRVGAHLRNCVVGPYVKLGGEVHTSIVHSYSNKAHDGFL
GHAYIGRWCNLGAGTTASNLRNDYGPVTLYNEALGMFESSGRQFLGVFIGDHTKTSIGT
TFNTGTVVGVSCNLYGPGFHARYVPSFSWGSPSEGYVPFRLEKALRVAEAVMARRQHRL
DEAERLALTAVFEAIHADKT"
/db_xref="SSO:000003126"
gene 101660..102910
/product="hypothetical protein"
/translation="MALLLILGLLFTTQIDSTQEETLPSSSPHQATCDAFWPLECRKPR
SMAALAGEFPHRWPFRELALYHALPPARYNRVEGLVFGLATKPLEWTEFDRVRLLGQLS
YAFALRRWRYEIGGETILDPAHNPEYALKLGGGYFRNTVTEDLWKTSPVENTLAAFFFG
HDFYHLYYEVEGWQLYAVQRLTRYSQLGVGFRAEAHRALSRQTRWSLFKREAFLPNLPA
EEGREHALLLSLDAGRVVNYRALPSGWAVRLLAEWGRGLGGDLRFVRYLGDARLYLFTG
HYSRLNLRLRGMWTSDNAPLQKHVTLGGIGSVRGYAQNAFSGTRMVLGNVEWTMQGVSL
IPGRVIDDVVFLAFADVGWVNAFGHNAFRMRDLLPSAGIGLGFDHGRSMRLELAWPLRD
MGQGYRPSLWVRISPAF"
/db_xref="SSO:000009137"
mRNA 101660..102910
CDS 101660..102910
/product="hypothetical protein"
/translation="MALLLILGLLFTTQIDSTQEETLPSSSPHQATCDAFWPLECRKPR
SMAALAGEFPHRWPFRELALYHALPPARYNRVEGLVFGLATKPLEWTEFDRVRLLGQLS
YAFALRRWRYEIGGETILDPAHNPEYALKLGGGYFRNTVTEDLWKTSPVENTLAAFFFG
HDFYHLYYEVEGWQLYAVQRLTRYSQLGVGFRAEAHRALSRQTRWSLFKREAFLPNLPA
EEGREHALLLSLDAGRVVNYRALPSGWAVRLLAEWGRGLGGDLRFVRYLGDARLYLFTG
HYSRLNLRLRGMWTSDNAPLQKHVTLGGIGSVRGYAQNAFSGTRMVLGNVEWTMQGVSL
IPGRVIDDVVFLAFADVGWVNAFGHNAFRMRDLLPSAGIGLGFDHGRSMRLELAWPLRD
MGQGYRPSLWVRISPAF"
/db_xref="SSO:000009137"
gene complement(102907..103389)
/product="Deoxyuridine 5'-triphosphate nucleotidohydrolase
(EC 3.6.1.23)"
/translation="MESHTLFDADCLVIPVQRLPHAQGLELPAYATPYSAGMDLRAAIP
EEAPYVLEPGRWALIPTGLVLALPPGYEAQVRPRSGLAARHGVTVLNSPGTIDADYRGE
VKVLLINLGPEPFVIRRGERIAQLVVARHARVAWEERAALDDTERGSGGFGSTGRA"
/db_xref="SSO:000002256"
mRNA complement(102907..103389)
CDS complement(102907..103389)
/product="Deoxyuridine 5'-triphosphate nucleotidohydrolase
(EC 3.6.1.23)"
/translation="MESHTLFDADCLVIPVQRLPHAQGLELPAYATPYSAGMDLRAAIP
EEAPYVLEPGRWALIPTGLVLALPPGYEAQVRPRSGLAARHGVTVLNSPGTIDADYRGE
VKVLLINLGPEPFVIRRGERIAQLVVARHARVAWEERAALDDTERGSGGFGSTGRA"
/db_xref="SSO:000002256"
gene complement(103409..104929)
/product="Di-tripeptide/cation symporter"
/translation="MCASAQKMQAAAATYERGFFGHPRGLATLFFTELWERFSYYGMRA
LLVLFMTTATTAANPGLGYDVGKAAAIYGLYTFFVYVLSLPGGWLADKLWGQRRAVFVG
GVIIAMGHFTMAIPAEPTFFLGLFFIVIGTGLLKPNVSTIVGELYPEGGARRDAGFSIF
YMGINIGAVLGPTLCGLLGEGYNWHLGFSLAGVGMVAGLISYKLGEKYLGEAGLFRPEP
GEDAAVLARRARRFYTGAAVMAALIVVVGYLIATGHFPIALETLAQSLGVIVVVVTLLF
FAYIFFFGGHTALEKRRLGVILWLFVLAALFWSGFEQAGSSLNLFARDLTNRQLGDWEM
PASMLQNINPLFIILFAPIFGWLWTWLAQRQANPSIPVKFALGLLGLAAGFFVLSWGAA
HATPESPVSPMWLVVTYFLHTCGELCLSPVGLSSVTKLAPRGRVGQMMGVWFIAAALGN
LFAGLIAGRLETLAPAALFQSVALITGGAGLVALLASPAVRRLMGQVD"
mRNA complement(103409..104929)
CDS complement(103409..104929)
/product="Di-tripeptide/cation symporter"
/translation="MCASAQKMQAAAATYERGFFGHPRGLATLFFTELWERFSYYGMRA
LLVLFMTTATTAANPGLGYDVGKAAAIYGLYTFFVYVLSLPGGWLADKLWGQRRAVFVG
GVIIAMGHFTMAIPAEPTFFLGLFFIVIGTGLLKPNVSTIVGELYPEGGARRDAGFSIF
YMGINIGAVLGPTLCGLLGEGYNWHLGFSLAGVGMVAGLISYKLGEKYLGEAGLFRPEP
GEDAAVLARRARRFYTGAAVMAALIVVVGYLIATGHFPIALETLAQSLGVIVVVVTLLF
FAYIFFFGGHTALEKRRLGVILWLFVLAALFWSGFEQAGSSLNLFARDLTNRQLGDWEM
PASMLQNINPLFIILFAPIFGWLWTWLAQRQANPSIPVKFALGLLGLAAGFFVLSWGAA
HATPESPVSPMWLVVTYFLHTCGELCLSPVGLSSVTKLAPRGRVGQMMGVWFIAAALGN
LFAGLIAGRLETLAPAALFQSVALITGGAGLVALLASPAVRRLMGQVD"
gene 105122..106990
/product="Aspartyl-tRNA synthetase (EC 6.1.1.12)"
/translation="MSTPHVQENSALEHDTHGPRTHTCGDLRAEHVGQEVVLKGWVDTR
RDLGGVIFIDLRDRYGLTQLVFSPQDSISAYQKAERLRSEYVISVRGIVQKRTPETVNP
KLATGEVEVRVRDLVVLNTSEPLPFPISAHEEKRTAASEDVRLKYRYLDLRRPELQRNL
LLRHRVYQVTRRYFDAHGFVEVETPVLMKSTPEGARDFLVPSRLHPGKFYALPQSPQTY
KQILMVAGLDRYFQIVKCFRDEDLRADRQPEFTQIDVEMTFPTEAQIFELIEGLIQAIW
QEIKGITLPRPFPRMRYDEALRRFGSDKPDTRFGLELQELGSVFQGSGFRVFESVLEQG
GTVVALVVPGMGDQGRAYMDRLDKEVVRKQIGASGLVYFKLPSDGGPVYSSVKEHVLRP
EVVQHALTVLQAQAGDLVLLLAGPKPQVYLQAGALRLHIAREQNLIPPTGEGPWHFLWV
TDFPLLEWDEETQRYYAMHHPFTSPHPDDLDRLEVDPGSVRARAYDLVLNGNEIGGGSI
RIHRQDVQRRMFRLLGIDDAEAERRFGFLLTAFRYGAPPHGGIALGLDRIVMLLAGAGS
LRDVIAFPKTQRAQELMSNTPDEVSPEQLEELHIRVVLPETASPRP"
/db_xref="SSO:000001106"
mRNA 105122..106990
CDS 105122..106990
/product="Aspartyl-tRNA synthetase (EC 6.1.1.12)"
/translation="MSTPHVQENSALEHDTHGPRTHTCGDLRAEHVGQEVVLKGWVDTR
RDLGGVIFIDLRDRYGLTQLVFSPQDSISAYQKAERLRSEYVISVRGIVQKRTPETVNP
KLATGEVEVRVRDLVVLNTSEPLPFPISAHEEKRTAASEDVRLKYRYLDLRRPELQRNL
LLRHRVYQVTRRYFDAHGFVEVETPVLMKSTPEGARDFLVPSRLHPGKFYALPQSPQTY
KQILMVAGLDRYFQIVKCFRDEDLRADRQPEFTQIDVEMTFPTEAQIFELIEGLIQAIW
QEIKGITLPRPFPRMRYDEALRRFGSDKPDTRFGLELQELGSVFQGSGFRVFESVLEQG
GTVVALVVPGMGDQGRAYMDRLDKEVVRKQIGASGLVYFKLPSDGGPVYSSVKEHVLRP
EVVQHALTVLQAQAGDLVLLLAGPKPQVYLQAGALRLHIAREQNLIPPTGEGPWHFLWV
TDFPLLEWDEETQRYYAMHHPFTSPHPDDLDRLEVDPGSVRARAYDLVLNGNEIGGGSI
RIHRQDVQRRMFRLLGIDDAEAERRFGFLLTAFRYGAPPHGGIALGLDRIVMLLAGAGS
LRDVIAFPKTQRAQELMSNTPDEVSPEQLEELHIRVVLPETASPRP"
/db_xref="SSO:000001106"
gene 106998..107405
/product="hypothetical protein"
/translation="MTYSAPFLALFAQHFRWADWEALIQQQGWTIDRPYRSRHPLFPEI
IYPIDYGFIHGTQSSDGQPIDVFIGHGNQGLVGAILTIDRRQSKREVKLLYNCTPEEIY
LVNGFINFNRQLLEGFLVLRYPMVSLWALSS"
/db_xref="SSO:000009137"
mRNA 106998..107405
CDS 106998..107405
/product="hypothetical protein"
/translation="MTYSAPFLALFAQHFRWADWEALIQQQGWTIDRPYRSRHPLFPEI
IYPIDYGFIHGTQSSDGQPIDVFIGHGNQGLVGAILTIDRRQSKREVKLLYNCTPEEIY
LVNGFINFNRQLLEGFLVLRYPMVSLWALSS"
/db_xref="SSO:000009137"
gene complement(107369..108295)
/product="Spermidine synthase (EC 2.5.1.16)"
/translation="MASPKQHQLQYTEFWQQRTGITFGVERVLFDRQSAYQRVQVLETD
AFGRLLTLDGLVMLTERDEFVYHEMIAHPALCLLPHPRRVLIVGGGDGGTLREVLRHAT
VEQVDLVEIDEVVIEASRAFFPALSVAFDDPRARIHVADGVAFVQQAQAASYDLIIVDA
TDPVDFAEGLFGEAFYRDCARILTADGILVTQSESPFDPTFQRSIQAAYAMLGRIFGRV
YMYLAHIPTYPMGLWSFTLASKRLHPVEHFDFKRAVDRLAPFAEQLRYYNATLHRAAFA
LPSFVQRLFEVAAPPFQEDNAQSDTIG"
/db_xref="SSO:000007627"
mRNA complement(107369..108295)
CDS complement(107369..108295)
/product="Spermidine synthase (EC 2.5.1.16)"
/translation="MASPKQHQLQYTEFWQQRTGITFGVERVLFDRQSAYQRVQVLETD
AFGRLLTLDGLVMLTERDEFVYHEMIAHPALCLLPHPRRVLIVGGGDGGTLREVLRHAT
VEQVDLVEIDEVVIEASRAFFPALSVAFDDPRARIHVADGVAFVQQAQAASYDLIIVDA
TDPVDFAEGLFGEAFYRDCARILTADGILVTQSESPFDPTFQRSIQAAYAMLGRIFGRV
YMYLAHIPTYPMGLWSFTLASKRLHPVEHFDFKRAVDRLAPFAEQLRYYNATLHRAAFA
LPSFVQRLFEVAAPPFQEDNAQSDTIG"
/db_xref="SSO:000007627"
gene complement(108395..108790)
/product="S-adenosylmethionine decarboxylase proenzyme (EC
4.1.1.50), prokaryotic class 1B"
/translation="MQALGRQILVEFYNCDREVLNNEALIREILIEGVRRSRATVITDT
FHSFSPHGVSGVVVIAESHVAIHTWPEHGYAAVDIFTCGETIDPWVIQRYLEERFRARN
VSSMELKRGLFPERVPHKPVVEEVVAA"
mRNA complement(108395..108790)
CDS complement(108395..108790)
/product="S-adenosylmethionine decarboxylase proenzyme (EC
4.1.1.50), prokaryotic class 1B"
/translation="MQALGRQILVEFYNCDREVLNNEALIREILIEGVRRSRATVITDT
FHSFSPHGVSGVVVIAESHVAIHTWPEHGYAAVDIFTCGETIDPWVIQRYLEERFRARN
VSSMELKRGLFPERVPHKPVVEEVVAA"
gene 109722..111650
/product="Ferredoxin--nitrite reductase (EC 1.7.7.1)"
/translation="MSVETRVRYGRREQELSWELVLKRNSIERLKQERPPLHVVEELPE
LIARGYEAIPEEDIVRLYWYGIAHDKPKIGTFMVRLKVPGGLLRPDQLRAIGEIAGRYG
RDYGELTTRQGIQLHWVAMDKLPEVLEAIARAGLTTVGAEGDTVRNITSCPVNGINPAE
LFDVRPVIEAAARFFWGNPEYSNLPRKHKFTISSCPYQCNAPEIHDIALIGVHKEGRVG
FAVKVGGGLSATPRLARDLGVFVPVEEAVEVLAAITDVWQQDLRYRISRAKARIKFLVD
DYGPEGVRRLVEERLGRKLEDFRAPDPLPGGNHLGVHRQKQEGLWYAGFPVPSGRVTGT
QLRQIADVLEAVGGDIRFTREQNFILGNLPESRLTWVLDRLREIGFPIERHRLYGTSTA
CTSHQFCNYSVAETKEKLDEIIAALEAHYGDAIQDLTIYMDGCPHACAHHWVGDIGLQG
TRTAGPNGTKIEAYDVTLRGGLGVHAAIGRPILRRIPSEEISAAIVRLVGSWLQERQRL
GNHYTFQAFCEAHANEELQAIALGEVVPEPEAVQEVSLIRIPGPLLELTEGSDVVEVKA
PTVRVALEQAGRRYPKLKAAVLTPEGQLNEAFNLYLNEEDIQSLQGLDTPLKPGDELLI
LIAMSGG"
mRNA 109722..111650
CDS 109722..111650
/product="Ferredoxin--nitrite reductase (EC 1.7.7.1)"
/translation="MSVETRVRYGRREQELSWELVLKRNSIERLKQERPPLHVVEELPE
LIARGYEAIPEEDIVRLYWYGIAHDKPKIGTFMVRLKVPGGLLRPDQLRAIGEIAGRYG
RDYGELTTRQGIQLHWVAMDKLPEVLEAIARAGLTTVGAEGDTVRNITSCPVNGINPAE
LFDVRPVIEAAARFFWGNPEYSNLPRKHKFTISSCPYQCNAPEIHDIALIGVHKEGRVG
FAVKVGGGLSATPRLARDLGVFVPVEEAVEVLAAITDVWQQDLRYRISRAKARIKFLVD
DYGPEGVRRLVEERLGRKLEDFRAPDPLPGGNHLGVHRQKQEGLWYAGFPVPSGRVTGT
QLRQIADVLEAVGGDIRFTREQNFILGNLPESRLTWVLDRLREIGFPIERHRLYGTSTA
CTSHQFCNYSVAETKEKLDEIIAALEAHYGDAIQDLTIYMDGCPHACAHHWVGDIGLQG
TRTAGPNGTKIEAYDVTLRGGLGVHAAIGRPILRRIPSEEISAAIVRLVGSWLQERQRL
GNHYTFQAFCEAHANEELQAIALGEVVPEPEAVQEVSLIRIPGPLLELTEGSDVVEVKA
PTVRVALEQAGRRYPKLKAAVLTPEGQLNEAFNLYLNEEDIQSLQGLDTPLKPGDELLI
LIAMSGG"
gene 111676..112482
/product="Adenylyl-sulfate reductase [thioredoxin] (EC
1.8.4.10)"
/translation="MARQPLFDDLEIGEIALQLDDQEPEDVIAWALETFDENRIAIVTA
LQADGMVILDMAYRIKPNIRVMTVDTGRLPQATYDFYEQVRTRYPKARFEILFPDYHEV
EELVRRHGVNPFYKSVPLRLLCCHIRKVRPLIRALNHLDAWFTGLRRDQWASRAAIRKV
EIDHDHDGVIKINPLADWTKEDVWAYIEEFDVPTHPLYAEGYTSIGCAPCTRPIQPGED
ERAGRWWWETNAPKECGIHCPIETGGFEHEMEAIVGHGHSTNGHAH"
/db_xref="SSO:000000825"
mRNA 111676..112482
CDS 111676..112482
/product="Adenylyl-sulfate reductase [thioredoxin] (EC
1.8.4.10)"
/translation="MARQPLFDDLEIGEIALQLDDQEPEDVIAWALETFDENRIAIVTA
LQADGMVILDMAYRIKPNIRVMTVDTGRLPQATYDFYEQVRTRYPKARFEILFPDYHEV
EELVRRHGVNPFYKSVPLRLLCCHIRKVRPLIRALNHLDAWFTGLRRDQWASRAAIRKV
EIDHDHDGVIKINPLADWTKEDVWAYIEEFDVPTHPLYAEGYTSIGCAPCTRPIQPGED
ERAGRWWWETNAPKECGIHCPIETGGFEHEMEAIVGHGHSTNGHAH"
/db_xref="SSO:000000825"
gene 112489..112947
/product="hypothetical protein"
/translation="MPLTIPEAAQEPLHVELAAFVASLHDASTRQRYQRLLDAVATGQV
EDQALEEALERFLEIALQTGRIRQQHGAHEEKALRELFLQTRRGSQLRAALQQVNEALR
ALQGHTLRELTFLPHNPGTYRLMLRTDQVQLTLEINGQGVWVENLAVG"
/db_xref="SSO:000009137"
mRNA 112489..112947
CDS 112489..112947
/product="hypothetical protein"
/translation="MPLTIPEAAQEPLHVELAAFVASLHDASTRQRYQRLLDAVATGQV
EDQALEEALERFLEIALQTGRIRQQHGAHEEKALRELFLQTRRGSQLRAALQQVNEALR
ALQGHTLRELTFLPHNPGTYRLMLRTDQVQLTLEINGQGVWVENLAVG"
/db_xref="SSO:000009137"
gene 112947..114005
/product="Anthranilate phosphoribosyltransferase-like
protein"
/translation="MEAFIPYIQAVGRGEKLKRDLTREEARQALELILAGKATPAQIGA
FLITQRVKGETAEEIIGFVEAARAVCHQLYPKLPDLLDLGTPYDGKARTPQLAVAIALI
TAAAGQPVVLHGAPDVPTKRGITPAHVLSALGIPADQPLSTVATQLETLGIGYLHAPRF
APAWHALTPIRQQFGLRTALNTVEKLLNPANATRCVVGFFHRNYLLRMRPAIGRLFPGS
WLIQGIEGSIECRAGRTTRLYPADAEGKPLVIEAPRLGFATSDDTVVPPDPQLHAEVTQ
SILQDRPSPCRDTALLTAGVLLYLSGRVDRLADGLGQARAVLAEGKALRLLADWRALSQ
RTPYPTEASAAT"
mRNA 112947..114005
CDS 112947..114005
/product="Anthranilate phosphoribosyltransferase-like
protein"
/translation="MEAFIPYIQAVGRGEKLKRDLTREEARQALELILAGKATPAQIGA
FLITQRVKGETAEEIIGFVEAARAVCHQLYPKLPDLLDLGTPYDGKARTPQLAVAIALI
TAAAGQPVVLHGAPDVPTKRGITPAHVLSALGIPADQPLSTVATQLETLGIGYLHAPRF
APAWHALTPIRQQFGLRTALNTVEKLLNPANATRCVVGFFHRNYLLRMRPAIGRLFPGS
WLIQGIEGSIECRAGRTTRLYPADAEGKPLVIEAPRLGFATSDDTVVPPDPQLHAEVTQ
SILQDRPSPCRDTALLTAGVLLYLSGRVDRLADGLGQARAVLAEGKALRLLADWRALSQ
RTPYPTEASAAT"
gene complement(113975..114550)
/product="hypothetical protein"
/translation="MALENSTTLQVARLTAFATLGTLSATQALIGRVWEALEGVDPERL
AEETLCLVATATARALEVGLQAASALRQAVVAALLELPLTYRDYLLGEVLLEGEDHRDL
EAAGQEVYSRLERMLTFYQAHLPAGQFPGERLLAEKMALWMGRISPPGLPELPQARMER
LDVVPLLHAHLRLVLMFGRHVAAEASVG"
/db_xref="SSO:000009137"
mRNA complement(113975..114550)
CDS complement(113975..114550)
/product="hypothetical protein"
/translation="MALENSTTLQVARLTAFATLGTLSATQALIGRVWEALEGVDPERL
AEETLCLVATATARALEVGLQAASALRQAVVAALLELPLTYRDYLLGEVLLEGEDHRDL
EAAGQEVYSRLERMLTFYQAHLPAGQFPGERLLAEKMALWMGRISPPGLPELPQARMER
LDVVPLLHAHLRLVLMFGRHVAAEASVG"
/db_xref="SSO:000009137"
gene 114632..116194
/product="Two-component transcriptional response regulator,
LuxR family"
/translation="MPIPSLQEEVVLLLDSLEVALLELATSSPQAKVTALRLLVRASQL
LSAYVHIPEVAAMHQEIQYLIRHAEALQPEDIQEVLQTARKALETVAAQLPALRVHILV
VEPDVDSAALLSTMLETPYRSLTLVATAKEAQALLCRQPFHLVITELLLPDLDGRSLLL
WIRQQPNLNTVPVLLLSSRASSTIKAECYALGADGFLEKPFDPAMLTSTVANLLQRTLL
QQGGDPLTGLPGRVMLEEAFARFCSLHASTGAPFCLALIDLDHFSEINQRYGTAAADEI
LRQAAWRLGRLLRPGDFLGRWESDMFCLLLPDTSATQAKELLTQALRVLQLEPFEISPN
ASLVLSFSACIVPVTSPQVQLVLLIEQAQKCLMVQKTSGTIRTYQEPSASKPRILLVED
DPDIAALIQIRLQRDGYEVVVFANGREAAAWAQTNAAQLVILDVKLPGMDGFELLSFLR
SQPAYKTVPIVLLTSLSQEHHVVRGFELGADDYVLKPFSPVELSARVRRLLHRQEIRIA
QAA"
mRNA 114632..116194
CDS 114632..116194
/product="Two-component transcriptional response regulator,
LuxR family"
/translation="MPIPSLQEEVVLLLDSLEVALLELATSSPQAKVTALRLLVRASQL
LSAYVHIPEVAAMHQEIQYLIRHAEALQPEDIQEVLQTARKALETVAAQLPALRVHILV
VEPDVDSAALLSTMLETPYRSLTLVATAKEAQALLCRQPFHLVITELLLPDLDGRSLLL
WIRQQPNLNTVPVLLLSSRASSTIKAECYALGADGFLEKPFDPAMLTSTVANLLQRTLL
QQGGDPLTGLPGRVMLEEAFARFCSLHASTGAPFCLALIDLDHFSEINQRYGTAAADEI
LRQAAWRLGRLLRPGDFLGRWESDMFCLLLPDTSATQAKELLTQALRVLQLEPFEISPN
ASLVLSFSACIVPVTSPQVQLVLLIEQAQKCLMVQKTSGTIRTYQEPSASKPRILLVED
DPDIAALIQIRLQRDGYEVVVFANGREAAAWAQTNAAQLVILDVKLPGMDGFELLSFLR
SQPAYKTVPIVLLTSLSQEHHVVRGFELGADDYVLKPFSPVELSARVRRLLHRQEIRIA
QAA"
gene 116204..117295
/product="hypothetical protein"
/translation="MIGAIAQELLELTFGDRLFQAALIFFYVLVGLTGLMVIAAVLLRW
RNEWQQAHLQHQEARWKAQLMAVLVGAQPPETLWAIVAPNEALAFCAFLYRFARRVKGT
ELAQFRRLARPYLPQLRRAIDRGSPEKRAYYLQILGVLSDENLSEVLLQALDDPAPLVA
LVAFRRLARAENAHLTPHLVDRLHRFSQSSPALLASLLSRLGFEALPMLRQALSNVQRP
SWVRAVLAETLSLLNDPHGAFIAARLLQEKDLPEELTIALLRLLAHGGSPAHATILLPY
LRHPKEALRLEAVQTLGTIGDSSSLPLLVEAMHDDSPWVALAAARALKRQNAFSLLAQL
AEQYPSRRLLIEQVLHESPQEEP"
/db_xref="SSO:000009137"
mRNA 116204..117295
CDS 116204..117295
/product="hypothetical protein"
/translation="MIGAIAQELLELTFGDRLFQAALIFFYVLVGLTGLMVIAAVLLRW
RNEWQQAHLQHQEARWKAQLMAVLVGAQPPETLWAIVAPNEALAFCAFLYRFARRVKGT
ELAQFRRLARPYLPQLRRAIDRGSPEKRAYYLQILGVLSDENLSEVLLQALDDPAPLVA
LVAFRRLARAENAHLTPHLVDRLHRFSQSSPALLASLLSRLGFEALPMLRQALSNVQRP
SWVRAVLAETLSLLNDPHGAFIAARLLQEKDLPEELTIALLRLLAHGGSPAHATILLPY
LRHPKEALRLEAVQTLGTIGDSSSLPLLVEAMHDDSPWVALAAARALKRQNAFSLLAQL
AEQYPSRRLLIEQVLHESPQEEP"
/db_xref="SSO:000009137"
gene 117292..118701
/product="Glycosyl transferase, group 2 family"
/translation="MMQTFLPLLAVFQLVVLLYFLALNTYYLITSLLAFRSLHRYARRL
SSVDIDDLIATAGAPPVTIIVPAYNEAATIVEASRSLLTLRYPDYEILIVNDGSTDATL
EVLQTTYRLQPAPRFPLAHLPTAPVRGVYQSQTHLNLWVIDKENGKRADAINAGINFCR
TPLLCIVDADGILEPEALMRIVRPFLEDVHTVASGGIIRVVNGCRVQDGLVADVRLPKR
WLARFQVVEYLRSFLAGRVGWDALQIMLLISGAFGMFRRDLVVAVGGLAHDSVGEDFEL
TVRLHRYCRERRLPYAIHFVPDPVAWTEVPETTALLGRQRDRWQRGLIDTLRRHRRLML
NPRYGRIGLVAYPYFFFFEMLGPVIEFLGYIVFFILGITGHISPAAALLFLWIAVLMSA
VLSVAAVGLEELSFRRYPQLRDLFLLLLLSLLESFGYRQLITFYRIRGTISYLRGQTGW
GTMERKGFQKG"
mRNA 117292..118701
CDS 117292..118701
/product="Glycosyl transferase, group 2 family"
/translation="MMQTFLPLLAVFQLVVLLYFLALNTYYLITSLLAFRSLHRYARRL
SSVDIDDLIATAGAPPVTIIVPAYNEAATIVEASRSLLTLRYPDYEILIVNDGSTDATL
EVLQTTYRLQPAPRFPLAHLPTAPVRGVYQSQTHLNLWVIDKENGKRADAINAGINFCR
TPLLCIVDADGILEPEALMRIVRPFLEDVHTVASGGIIRVVNGCRVQDGLVADVRLPKR
WLARFQVVEYLRSFLAGRVGWDALQIMLLISGAFGMFRRDLVVAVGGLAHDSVGEDFEL
TVRLHRYCRERRLPYAIHFVPDPVAWTEVPETTALLGRQRDRWQRGLIDTLRRHRRLML
NPRYGRIGLVAYPYFFFFEMLGPVIEFLGYIVFFILGITGHISPAAALLFLWIAVLMSA
VLSVAAVGLEELSFRRYPQLRDLFLLLLLSLLESFGYRQLITFYRIRGTISYLRGQTGW
GTMERKGFQKG"
gene 118705..119460
/product="hypothetical protein"
/translation="MQKLAFCLSLFFSLPITGIAQQPPSRWGAQVSYAYEALSGRRAPW
QISSAILQRHFAKTTLLAELASVQRFRRRDLAFALEGWAALWPQAYGNLRLQYAPSPNF
SPTYEPYLELYQGIGAWEVAVALRYRHFSNQEVTTWGLATGRYLGNWYLRTQALVTVVV
GHFNWTQRILARRYGTSPTSFVEVQAGYGRGVEIVDTGPVLKQLRTYFVTCRIQHFLTQ
TVGGTIGLSYSNDDLFTRRGAVLGVLTRW"
/db_xref="SSO:000009137"
mRNA 118705..119460
CDS 118705..119460
/product="hypothetical protein"
/translation="MQKLAFCLSLFFSLPITGIAQQPPSRWGAQVSYAYEALSGRRAPW
QISSAILQRHFAKTTLLAELASVQRFRRRDLAFALEGWAALWPQAYGNLRLQYAPSPNF
SPTYEPYLELYQGIGAWEVAVALRYRHFSNQEVTTWGLATGRYLGNWYLRTQALVTVVV
GHFNWTQRILARRYGTSPTSFVEVQAGYGRGVEIVDTGPVLKQLRTYFVTCRIQHFLTQ
TVGGTIGLSYSNDDLFTRRGAVLGVLTRW"
/db_xref="SSO:000009137"
gene complement(119465..120454)
/product="UPF0365 protein YqfA"
/translation="MELLFSSGLILLALIVAGLFLFFYFVPVGLWVTAYFSGVRLNLVR
DLVGMRLRKVPPAIIVKPLITAHKAGIYLETAQLEAHYLAGGNIQKVVNALISADKANI
DLSFERAAAIDLAGRDVYEAVQVSVNPKVIETPPVSAVAKDGIQVRAIARVTVRANIDR
LVGGAGEETIIARVGEGIVSTIGSANTHKEVLENPDRISKTVLEKGLDAGTAFEILSID
IADVDVGENIGAKLQIDQAEADLRVAQAKAEERRAAAVAREQEMRALVQEMRAKVVEAE
AEIPRAIAEALRQGNLGVLDYYNLRNIQADTEMRRAIGGAGQQEAEGG"
mRNA complement(119465..120454)
CDS complement(119465..120454)
/product="UPF0365 protein YqfA"
/translation="MELLFSSGLILLALIVAGLFLFFYFVPVGLWVTAYFSGVRLNLVR
DLVGMRLRKVPPAIIVKPLITAHKAGIYLETAQLEAHYLAGGNIQKVVNALISADKANI
DLSFERAAAIDLAGRDVYEAVQVSVNPKVIETPPVSAVAKDGIQVRAIARVTVRANIDR
LVGGAGEETIIARVGEGIVSTIGSANTHKEVLENPDRISKTVLEKGLDAGTAFEILSID
IADVDVGENIGAKLQIDQAEADLRVAQAKAEERRAAAVAREQEMRALVQEMRAKVVEAE
AEIPRAIAEALRQGNLGVLDYYNLRNIQADTEMRRAIGGAGQQEAEGG"
gene complement(120541..121050)
/product="Cyclic pyranopterin monophosphate synthase (EC
4.6.1.17)"
/translation="MTQELQAREYMLTHLNPEGGVHMVDVSAKSDTVRTAVASGRVVLP
ADVLQAILAHEVRKGDVLTVAQIAGILGAKRTSQLIPLCHHVNLTGIDLELKPNEETHS
IEIRAFTKATGPTGVEMEALTAVAVAALTIYDMCKSLSKEIVITDIQLLAKTGGASGDY
RKALPR"
mRNA complement(120541..121050)
CDS complement(120541..121050)
/product="Cyclic pyranopterin monophosphate synthase (EC
4.6.1.17)"
/translation="MTQELQAREYMLTHLNPEGGVHMVDVSAKSDTVRTAVASGRVVLP
ADVLQAILAHEVRKGDVLTVAQIAGILGAKRTSQLIPLCHHVNLTGIDLELKPNEETHS
IEIRAFTKATGPTGVEMEALTAVAVAALTIYDMCKSLSKEIVITDIQLLAKTGGASGDY
RKALPR"
gene complement(121133..122779)
/product="FIG00840178: hypothetical protein"
/translation="MGAYGQADYVLVGGRLYTVDPAQPIAEAMAVQGERILMVGTSEQV
LAAYPNAQRIDLDGYVVVPGFIDAHAHLMGLGLNRMQADLTGTRSVQEVLERLKAFATS
LPEGAWLLGRGWDQNDWPVKAFPTRYMLDAAFPDRPVWLVRIDGHAAWANTAALQQAAP
ELLATFVADPPGGRIVRDAQGIPTGVFIDAAMELVARHIPRPTEAVLEEALQRAVTEVH
RYGLTGVHDAGADWDTIQRYWRAIDRDALRLRLYVMVDGLGEAFEHICTQGPILGYKGY
LTVRSVKFYIDGALGSRGAALLAEYSDDPENQGLLRYAPEVFAEMVQQAMRCGLQVNTH
AIGDRGVRVVLDAYEQALQTLGRTAGRHRVEHAQVIAPPDFARFAALGVIASMQPTHAI
SDMYWAEDRLGPERVRGAYAWRTLLRHGARLAFGSDFPVESPNPLLGFYAAVTRQDAQG
WPPGGWYPEERLTREEALRAFTLGAAYAAFQEDELGSLTPGKYADFVVLSQDIMTIPPE
EILQTQVLATFVGGQCVFHHEAAAGLCPKLP"
mRNA complement(121133..122779)
CDS complement(121133..122779)
/product="FIG00840178: hypothetical protein"
/translation="MGAYGQADYVLVGGRLYTVDPAQPIAEAMAVQGERILMVGTSEQV
LAAYPNAQRIDLDGYVVVPGFIDAHAHLMGLGLNRMQADLTGTRSVQEVLERLKAFATS
LPEGAWLLGRGWDQNDWPVKAFPTRYMLDAAFPDRPVWLVRIDGHAAWANTAALQQAAP
ELLATFVADPPGGRIVRDAQGIPTGVFIDAAMELVARHIPRPTEAVLEEALQRAVTEVH
RYGLTGVHDAGADWDTIQRYWRAIDRDALRLRLYVMVDGLGEAFEHICTQGPILGYKGY
LTVRSVKFYIDGALGSRGAALLAEYSDDPENQGLLRYAPEVFAEMVQQAMRCGLQVNTH
AIGDRGVRVVLDAYEQALQTLGRTAGRHRVEHAQVIAPPDFARFAALGVIASMQPTHAI
SDMYWAEDRLGPERVRGAYAWRTLLRHGARLAFGSDFPVESPNPLLGFYAAVTRQDAQG
WPPGGWYPEERLTREEALRAFTLGAAYAAFQEDELGSLTPGKYADFVVLSQDIMTIPPE
EILQTQVLATFVGGQCVFHHEAAAGLCPKLP"
gene complement(122817..123281)
/product="D-aminoacyl-tRNA deacylase (EC 3.1.1.96)"
/translation="MVALVQRVAEASVEVNGQITGAIGRGLLILLGVHRDDTEAEADWL
ARKCAHLRIFPDEEGKMNRSLKDVGGQALVVSQFTLYGDVSRGHRPSFTESAAPEKAEC
LYQYFVQRLAQELGQTVPTGVFGAMMRVHLVNDGPVTLWVERKAISCHED"
/db_xref="SSO:000002007"
mRNA complement(122817..123281)
CDS complement(122817..123281)
/product="D-aminoacyl-tRNA deacylase (EC 3.1.1.96)"
/translation="MVALVQRVAEASVEVNGQITGAIGRGLLILLGVHRDDTEAEADWL
ARKCAHLRIFPDEEGKMNRSLKDVGGQALVVSQFTLYGDVSRGHRPSFTESAAPEKAEC
LYQYFVQRLAQELGQTVPTGVFGAMMRVHLVNDGPVTLWVERKAISCHED"
/db_xref="SSO:000002007"
gene complement(123283..123882)
[truncated: 97,645 more rows]
