# Supplementary material
Source: publisher figshare collection journal article supplement (https://microbiology.figshare.com/articles/dataset/_/17142701)
Supplement: Supplementary file 1 [file 1 › Supplementary information_07122021.pdf]

# ***Rhodothermus bifroesti* sp. nov., a thermophilic bacterium isolated from the basaltic subsurface of the island Surtsey.**

Pauline Bergsten<sup>1,2</sup>, Pauline Vannier<sup>1</sup>, Alan Mougeolle<sup>1</sup>, Louise Rigaud<sup>1</sup>, Viggó Thór Marteinsson<sup>1,3\*</sup>

<sup>1</sup> Matís, Exploration & Utilization of Genetic Resources, Reykjavík, Iceland

<sup>2</sup> Faculty of Life and Environmental Sciences, University of Iceland, Reykjavík, Iceland

<sup>3</sup> Faculty of Food Science and Nutrition, University of Iceland, Reykjavík, Iceland

\*Corresponding author: [viggo@matís.is](mailto:viggo@matís.is)

Running title: *Rhodothermus bifroesti* sp. nov.

Subject category: New taxa-*Rhodothermaceae*

## **Supplementary Text.**

Extended fatty acid analysis, quinones and polar lipids composition were carried out by the Identification service of Leibniz-institute DSMZ - Deutsche Sammlung von Mikroorganismen und Zellkulturen GmbH, Braunschweig, Germany.

### **Analysis of Cellular Fatty Acids by MIDI and GC-MS Cellular fatty acids**

Cellular fatty acid were analyzed after conversion into fatty acid methyl esters (FAMES) by saponification, methylation and extraction using minor modifications of the method of Miller (1982) and Kuykendall et al., (1988) (1,2). The fatty acid methyl esters mixtures are separated by gas chromatography and detected by a flame ionization detector using Sherlock Microbial Identification System (MIS) (MIDI, Microbial ID, Newark, DE 19711 U.S.A.). Peaks are automatically integrated and fatty acid names and percentages calculated by the MIS Standard Software (Microbial ID).

For identity confirmation and to resolve summed features of the MIDI analysis, the analysis is supplemented by a GC-MS run on a Agilent GC-MS 7000D using an Agilent HP-5ms UI 30 m x 250 µm x 0,25 µm column with a helium flow of 1.2 ml with an injection of 1 µl with split ratio of 7.5:1. The oven program was as follows: initial temperature 170°C, ramp 3°C/min to 200°C, ramp 5°C/min to 270°C, ramp 120°C/min to 300°C and hold for 2 min. The inlet temperature was set to 170 °C and then linearly increased with 200 °C/min up to 350 °C and hold for 5min. The mass spectrometry parameters were set to aux temperature 230°C, source temperature 230°C, and electron impact ionization at 70 eV with mass range of m/z 40-600 or 40-800, respectively. Peaks were identified based on retention time and mass spectra. The position of single double bounds was confirmed by a derivatization to the corresponding dimethyl disulfide adduct (3). Branched-chain fatty acid positions, cyclopositions and multiple double bounds were determined by derivatization to their 3-pyridylcarbinol (“picolinyl”) and/or 4,4-dimethyloxazoline (DMOX) derivatives (4–6).

### **Analysis of Respiratory Quinones**

Respiratory quinones are extracted from freeze dried cell material using hexane and are further purified by a silica-based solid phase extraction. Purified samples are further analysed by HPLC

using a reverse phase column recording absorption spectra. 270 nm for ubiquinones and 326 nm for menaquinones are used for a relative quantification. For complex mixtures, samples are further analysed on an UHPLC-ESI-qTOF system.

### **Analysis of polar lipids**

Polar lipids are extracted from freeze dried cell material using a chloroform:methanol:0.3% aqueous NaCl mixture, polar lipids are recovered into the chloroform phase (modified after Bligh and Dyer, 1959 (7)).

Polar lipids are separated by two dimensional silica gel thin layer chromatography. The first direction is developed in chloroform:methanol:water, and the second in chloroform:methanol:acetic acid:water. Total lipid material is detected using molybdotetraphosphoric acid and specific functional groups detected using spray reagents specific for defined functional groups (8).

## Supplementary Figures.

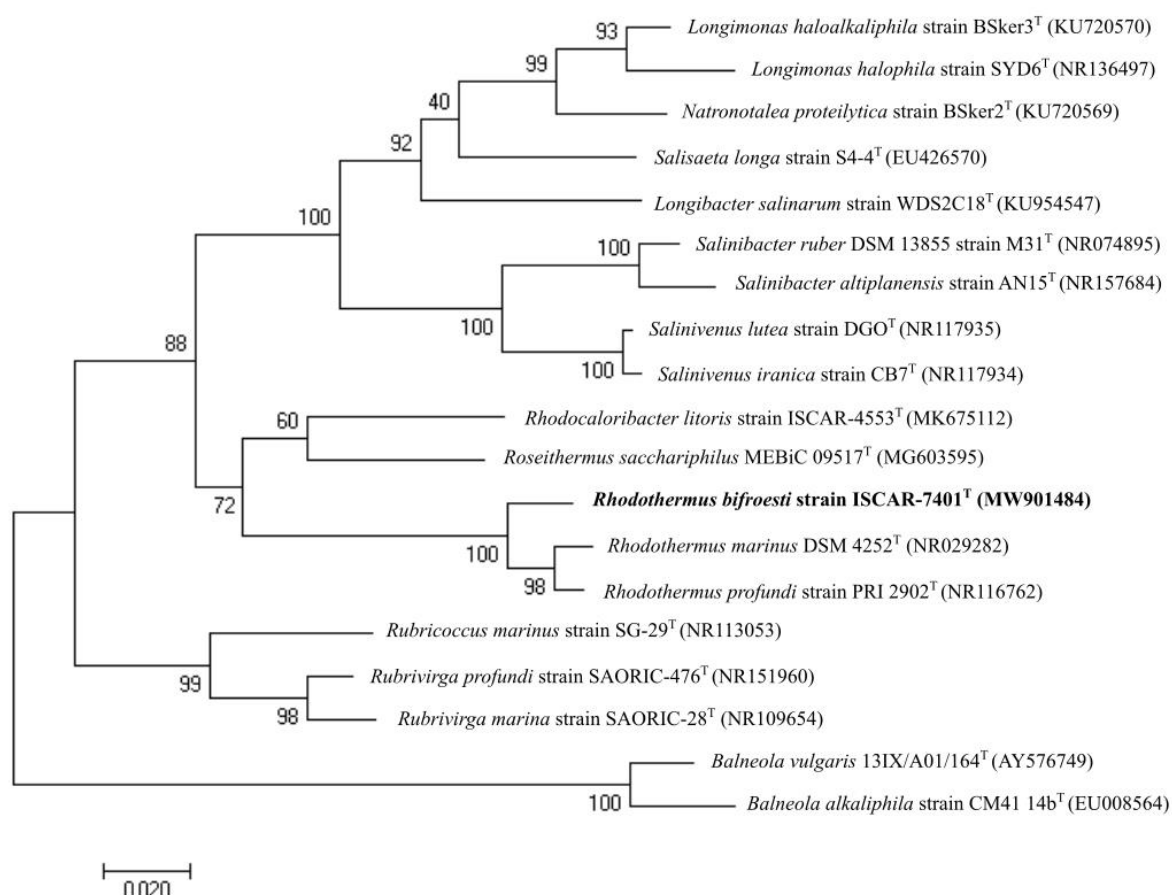

**Fig. S1.** Maximum Likelihood phylogenetic tree constructed based on the 16S rRNA gene sequences indicating the relationship of strain ISCAR-7401<sup>T</sup> with the type strains within *Rhodothermaceae* and other species within the *Rhodothermales*. GenBank accession numbers are given in parentheses. Bootstrap was carried out 1000 replicates using a total of 1354 positions in the final dataset. The sequences of *Balneola* species were used as an outgroup. Bar, 0.02 represented the nucleotide substitution per position.

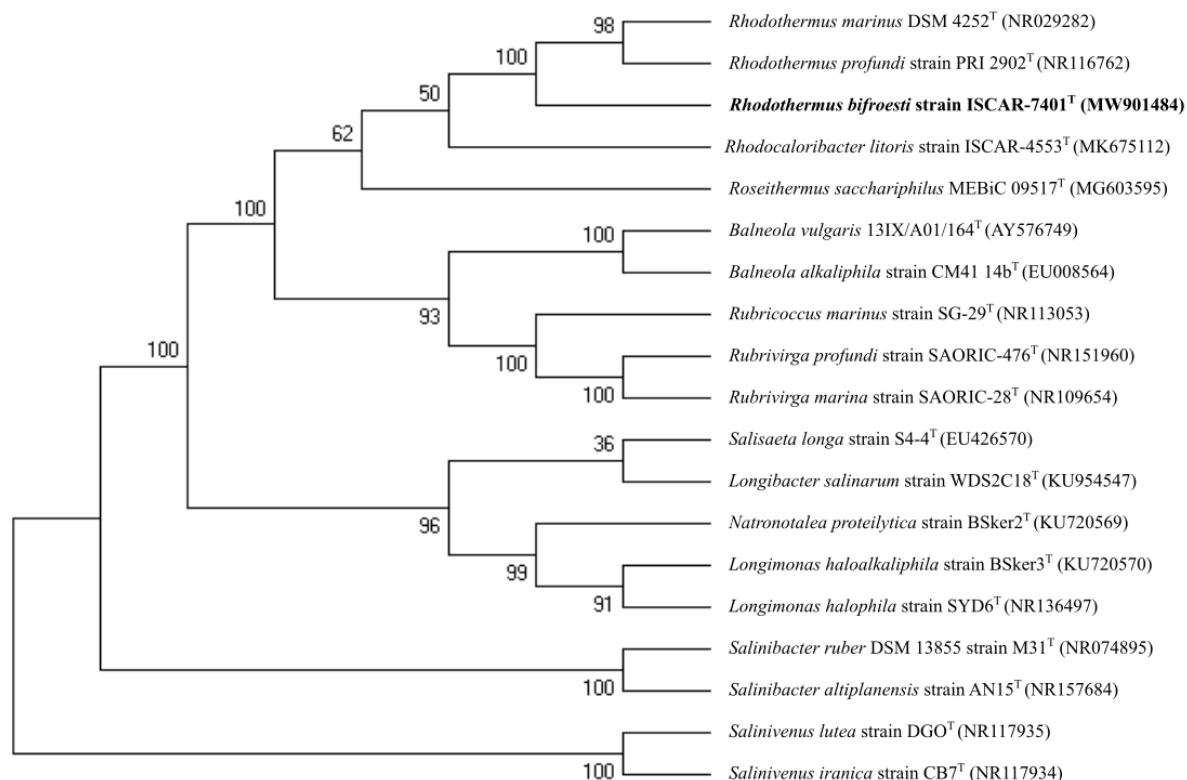

**Fig. S2.** Maximum-parsimony phylogenetic tree based on 16S rRNA gene sequences of strain ISCAR-7401<sup>T</sup> and closely related species. GenBank accession numbers are given in parentheses. Bootstrap was carried out 1000 replicates using a total of 1354 positions in the final dataset.

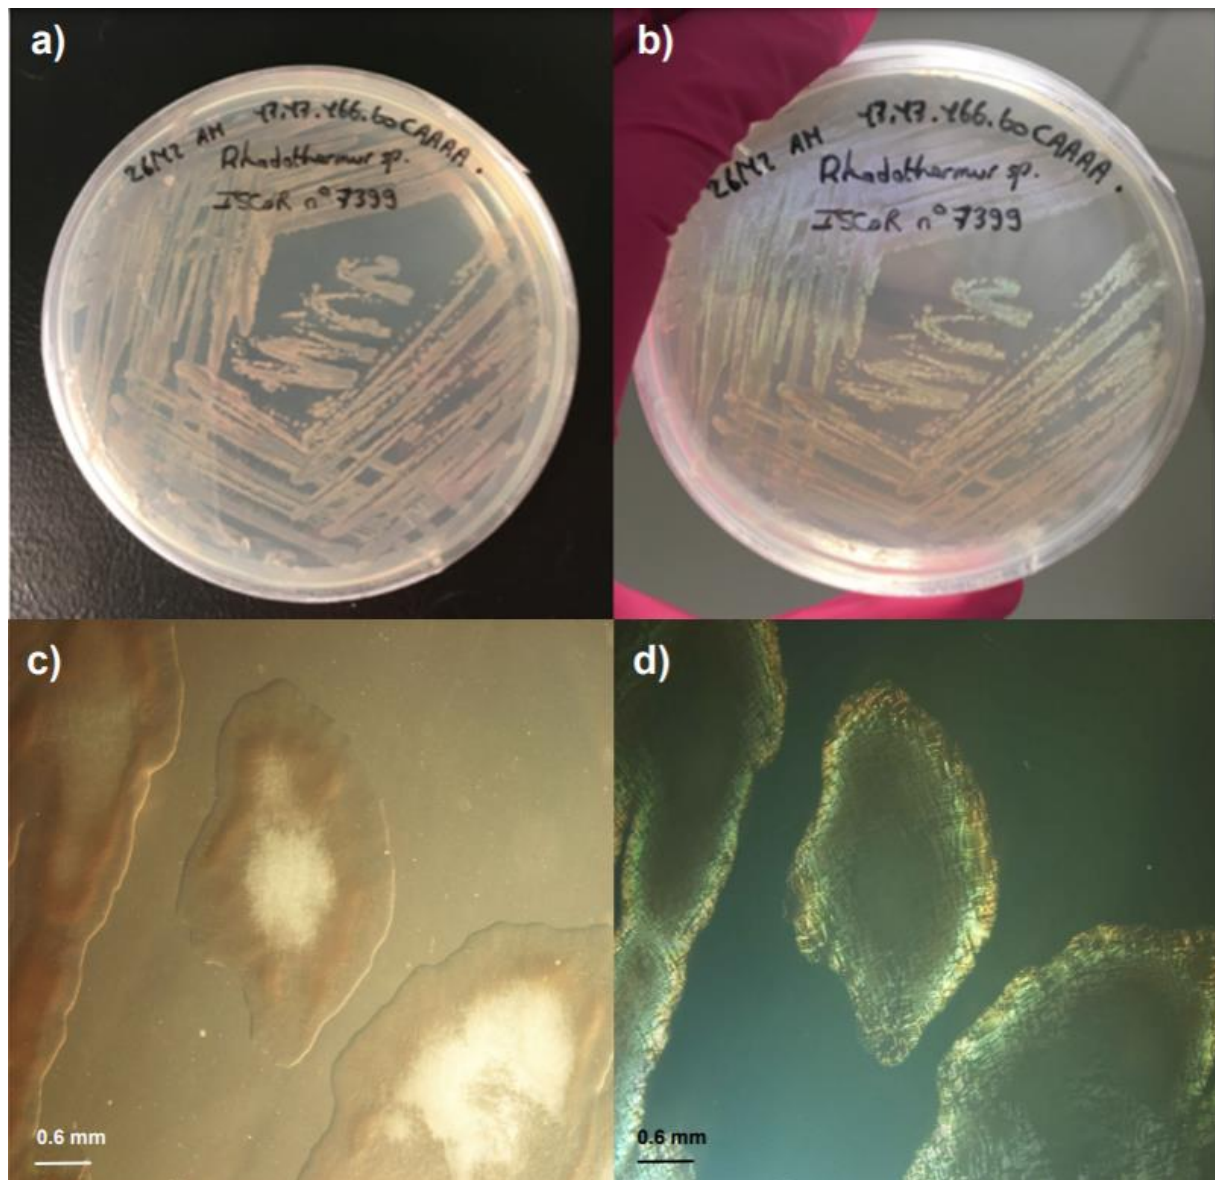

**Fig. S3.** Colonies of *Rhodothermus bifroesti* strain ISCAR-7399 at different scales and under different conditions of illumination. Colonies on a black background (a), under artificial light (b), observed with binocular microscope under condition of tran-illumination (c) and with a 60° angle-illumination (d), showing the iridescent characteristic of the species.

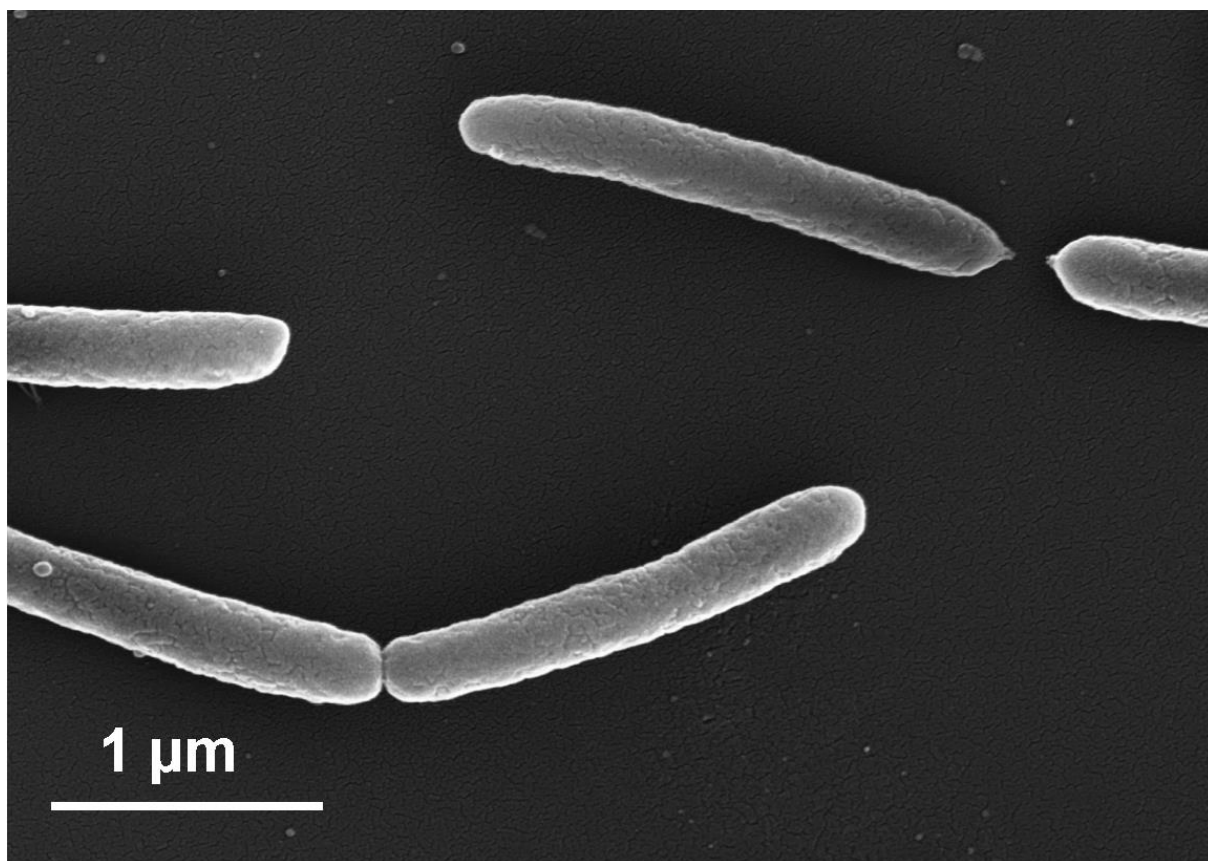

**Fig. S4.** Cell morphology of strain ISCAR-7401<sup>T</sup> observed using scanning electron microscope Supra25 Gemini FE-SEM (ZEISS) at electron high tension voltage of 20 kV.

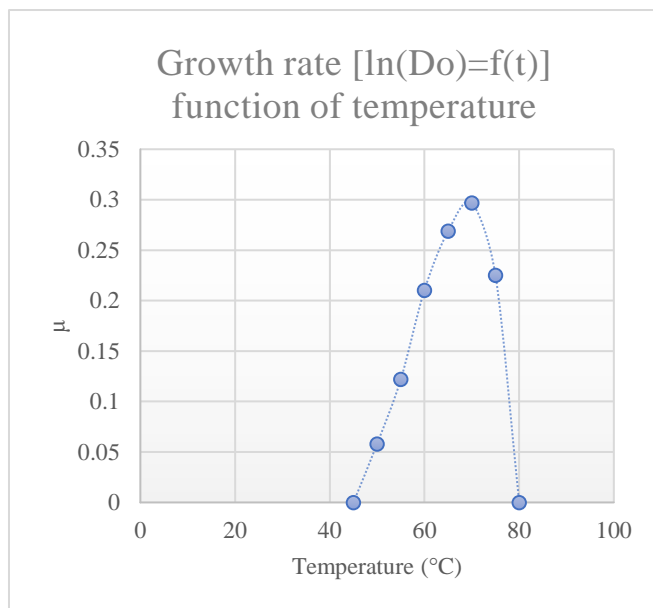

**Fig. S5.** Growth rates of the strain ISCAR-7401<sup>T</sup> function of the temperature.

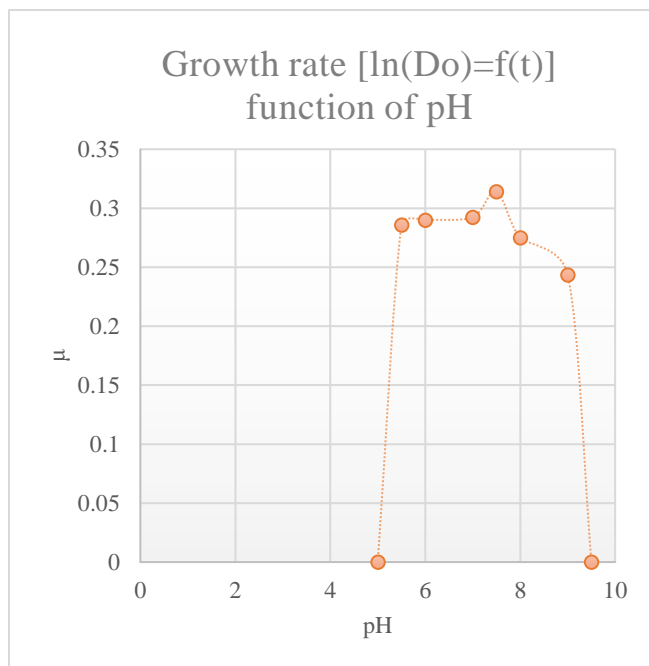

**Fig. S6.** Growth rates of strain ISCAR-7401<sup>T</sup> function of pH.

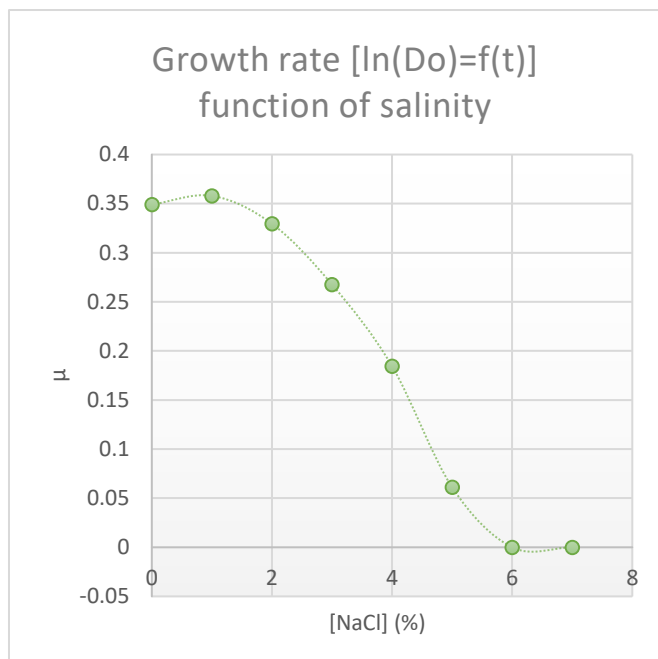

**Fig. S7.** Growth rates of strain ISCAR-7401<sup>T</sup> function of salinity.

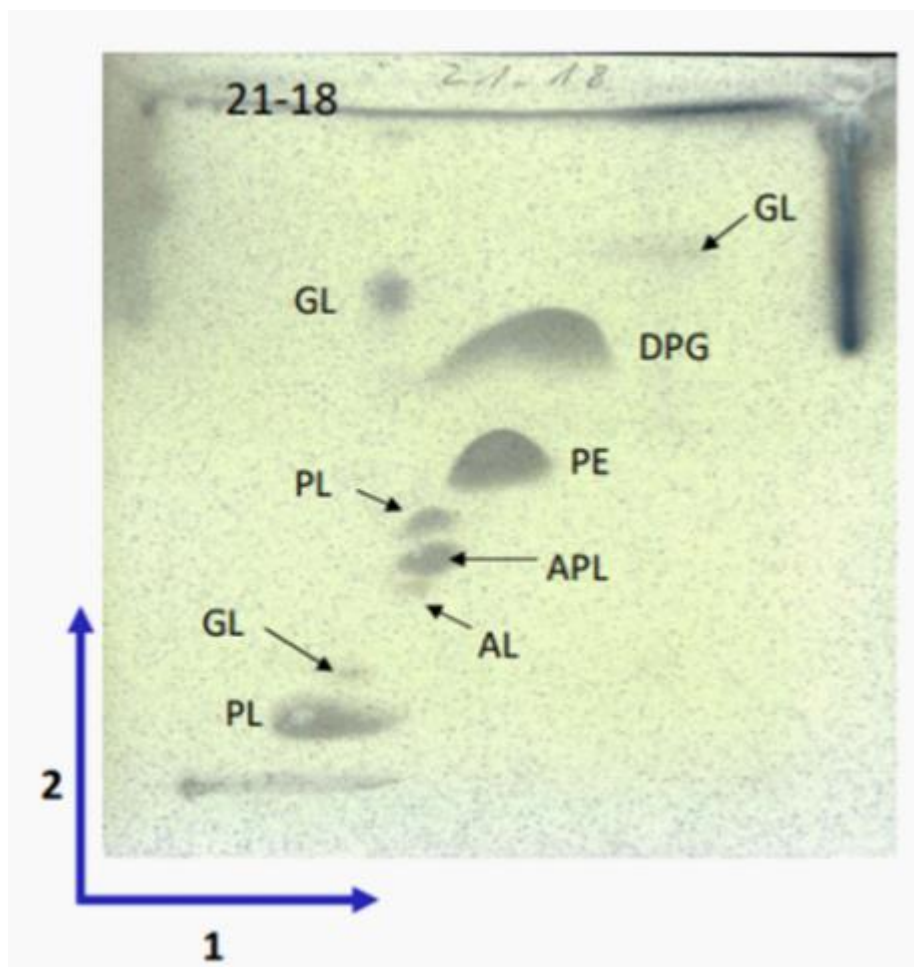

**Fig. S8.** Polar lipid profiles of strain ISCAR-7401<sup>T</sup>. Lipid identification legends: DPG, diphosphatidylglycerol; PE, phosphatidylethanolamine; AL, unidentified aminolipid; APL, unidentified aminophospholipid; GL, unidentified glycolipid; PL, unidentified phospholipid. 1, first dimension of TLC; 2, second dimension of TLC.

| RT     | Response | Ar/Ht | RFact | ECL    | Peak Name    | Percent | Comment1            | Comment2         | GC-MS |
|--------|----------|-------|-------|--------|--------------|---------|---------------------|------------------|-------|
| 1.763  | 4.965E+8 | 0.027 | ----  | 7.007  | SOLVENT PEAK | ----    | < min rt            |                  |       |
| 2.206  | 852      | 0.023 | ----  | 7.870  |              | ----    | < min rt            |                  |       |
| 2.689  | 866      | 0.026 | ----  | 8.813  |              | ----    | < min rt            |                  |       |
| 2.953  | 270      | 0.024 | ----  | 9.327  |              | ----    |                     |                  |       |
| 3.210  | 297      | 0.026 | ----  | 9.826  |              | ----    |                     |                  |       |
| 4.910  | 387      | 0.035 | ----  | 11.973 |              | ----    |                     |                  |       |
| 6.953  | 636      | 0.031 | 0.982 | 13.619 | 14:0 iso     | 0.55    | ECL deviates 0.000  | Reference -0.005 | OK    |
| 7.106  | 1062     | 0.036 | ----  | 13.730 |              | ----    |                     |                  |       |
| 8.446  | 13211    | 0.040 | 0.964 | 14.623 | 15:0 iso     | 11.20   | ECL deviates 0.000  | Reference -0.004 | OK    |
| 8.587  | 19256    | 0.040 | 0.963 | 14.713 | 15:0 anteiso | 16.31   | ECL deviates 0.000  | Reference -0.004 | OK    |
| 10.081 | 9166     | 0.043 | 0.952 | 15.627 | 16:0 iso     | 7.68    | ECL deviates 0.000  | Reference -0.004 | OK    |
| 10.703 | 5317     | 0.045 | 0.949 | 15.999 | 16:0         | 4.44    | ECL deviates -0.001 | Reference -0.005 | OK    |
| 11.800 | 48141    | 0.046 | 0.946 | 16.631 | 17:0 iso     | 40.07   | ECL deviates 0.001  | Reference -0.003 | OK    |
| 11.961 | 19382    | 0.045 | 0.946 | 16.723 | 17:0 anteiso | 16.13   | ECL deviates 0.000  | Reference -0.004 | OK    |
| 12.444 | 692      | 0.044 | 0.945 | 17.001 | 17:0         | 0.58    | ECL deviates 0.001  | Reference -0.003 | OK    |
| 13.557 | 2683     | 0.046 | 0.943 | 17.632 | 18:0 iso     | 2.23    | ECL deviates 0.000  | Reference -0.005 | OK    |
| 14.204 | 987      | 0.041 | 0.943 | 17.999 | 18:0         | 0.82    | ECL deviates -0.001 | Reference -0.006 | OK    |

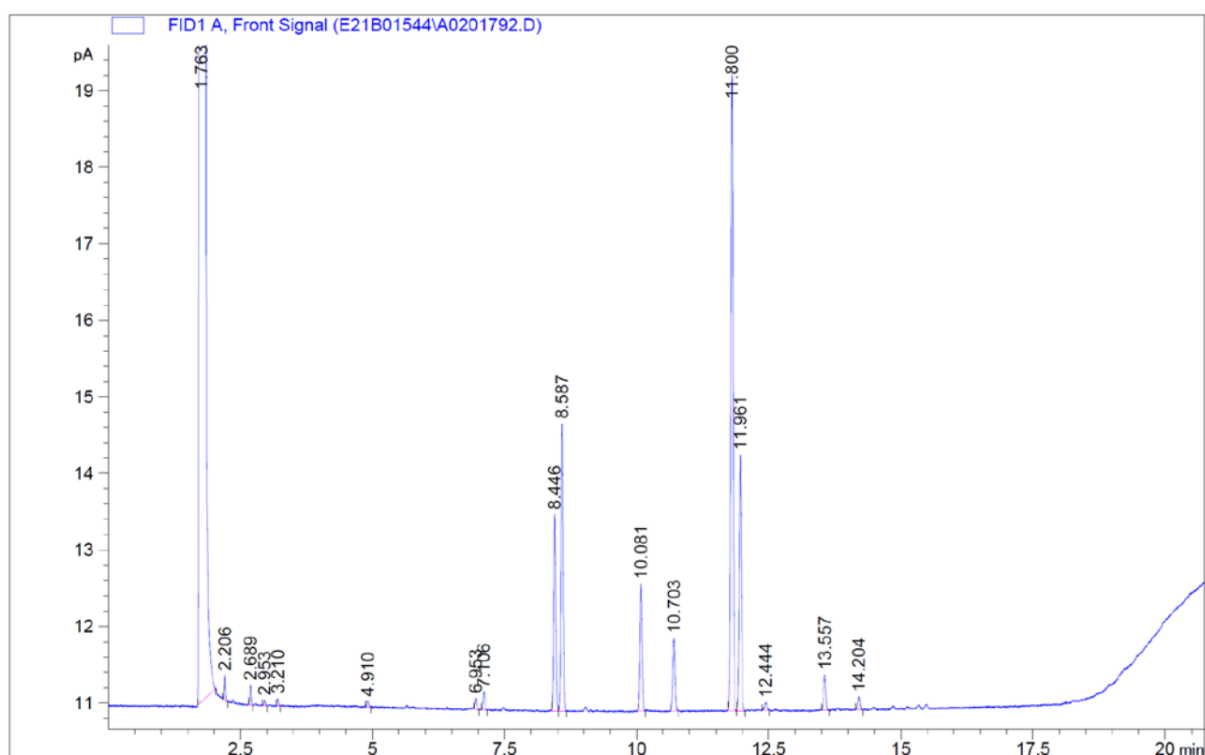

**Fig. S9.** Fatty acids analyses of *Rhodothermus bifroesti* strain ISCAR-7401<sup>T</sup>.

| RT     | Response | Ar/Ht | RFact | ECL    | Peak Name    | Percent | Comment1            | Comment2         | GC-MS |
|--------|----------|-------|-------|--------|--------------|---------|---------------------|------------------|-------|
| 1.763  | 4.924E+8 | 0.028 | ----  | 7.005  | SOLVENT PEAK | ----    | < min rt            |                  |       |
| 2.205  | 952      | 0.022 | ----  | 7.868  |              | ----    | < min rt            |                  |       |
| 2.690  | 2366     | 0.025 | ----  | 8.811  |              | ----    | < min rt            |                  |       |
| 2.957  | 210      | 0.025 | ----  | 9.333  |              | ----    |                     |                  |       |
| 3.215  | 336      | 0.029 | ----  | 9.834  |              | ----    |                     |                  |       |
| 4.911  | 488      | 0.030 | ----  | 11.973 |              | ----    |                     |                  |       |
| 6.954  | 3900     | 0.038 | 0.982 | 13.619 | 14:0 iso     | 1.70    | ECL deviates 0.000  | Reference -0.004 | OK    |
| 7.107  | 1900     | 0.036 | ----  | 13.730 |              | ----    |                     |                  |       |
| 8.447  | 15603    | 0.041 | 0.964 | 14.623 | 15:0 iso     | 6.68    | ECL deviates 0.000  | Reference -0.004 | OK    |
| 8.587  | 31513    | 0.040 | 0.963 | 14.714 | 15:0 anteiso | 13.48   | ECL deviates 0.001  | Reference -0.003 | OK    |
| 10.081 | 35466    | 0.043 | 0.952 | 15.627 | 16:0 iso     | 15.00   | ECL deviates 0.000  | Reference -0.004 | OK    |
| 10.702 | 7267     | 0.044 | 0.949 | 15.998 | 16:0         | 3.06    | ECL deviates -0.002 | Reference -0.006 | OK    |
| 11.801 | 77994    | 0.046 | 0.946 | 16.631 | 17:0 iso     | 32.78   | ECL deviates 0.001  | Reference -0.003 | OK    |
| 11.961 | 44723    | 0.045 | 0.946 | 16.723 | 17:0 anteiso | 18.79   | ECL deviates 0.000  | Reference -0.004 | OK    |
| 12.442 | 975      | 0.055 | 0.945 | 17.000 | 17:0         | 0.41    | ECL deviates 0.000  | Reference -0.004 | OK    |
| 13.555 | 15777    | 0.047 | 0.943 | 17.631 | 18:0 iso     | 6.61    | ECL deviates -0.001 | Reference -0.006 | OK    |
| 14.206 | 1668     | 0.049 | 0.943 | 18.000 | 18:0         | 0.70    | ECL deviates 0.000  | Reference -0.005 | OK    |
| 15.321 | 565      | 0.041 | 0.942 | 18.636 | 19:0 iso     | 0.24    | ECL deviates 0.002  | Reference -0.004 | OK    |
| 15.485 | 1325     | 0.043 | 0.942 | 18.729 | 19:0 anteiso | 0.55    | ECL deviates -0.002 | Reference -0.007 | OK    |

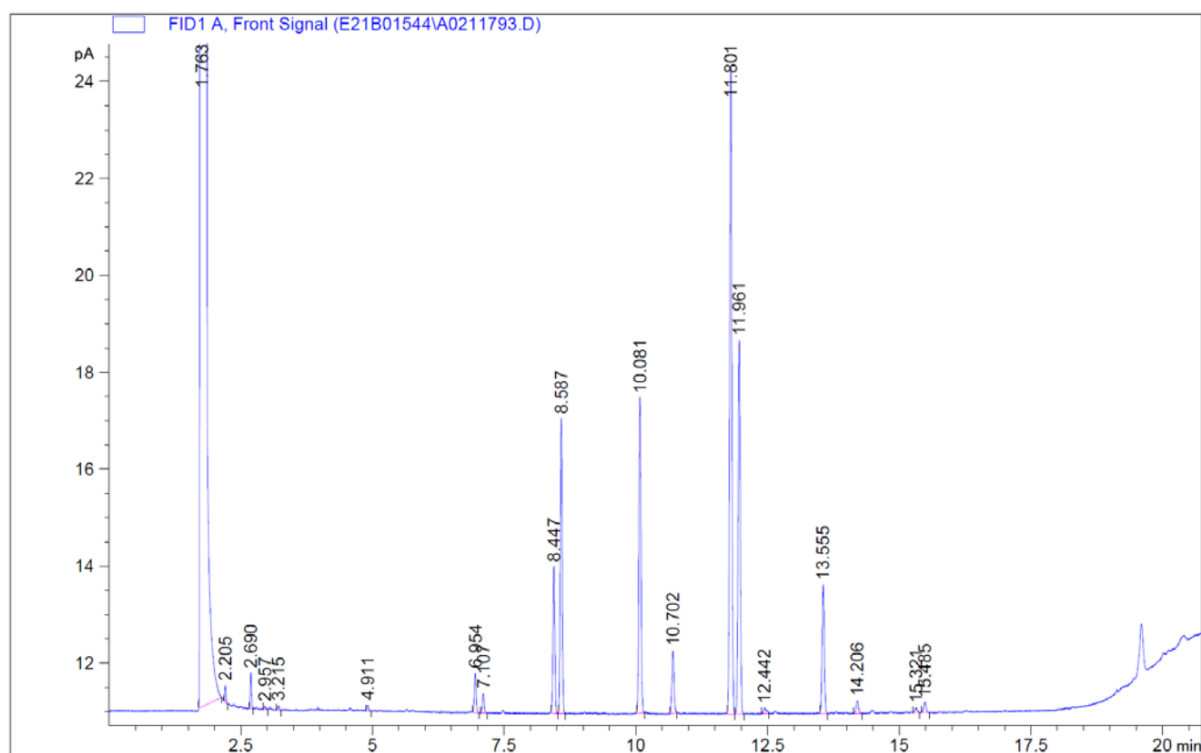

**Fig. S10.** Fatty acids analyses of *Rhodothermus marinus* DSM 4252<sup>T</sup>.

| RT     | Response | Ar/Ht | RFact | ECL    | Peak Name    | Percent | Comment1            | Comment2         | GC-MS |
|--------|----------|-------|-------|--------|--------------|---------|---------------------|------------------|-------|
| 1.763  | 4.938E+8 | 0.028 | ----  | 7.006  | SOLVENT PEAK | ----    | < min rt            |                  |       |
| 2.206  | 583      | 0.023 | ----  | 7.869  |              | ----    | < min rt            |                  |       |
| 2.690  | 1243     | 0.026 | ----  | 8.813  |              | ----    | < min rt            |                  |       |
| 2.958  | 283      | 0.032 | ----  | 9.334  |              | ----    |                     |                  |       |
| 3.214  | 320      | 0.026 | ----  | 9.834  |              | ----    |                     |                  |       |
| 4.909  | 450      | 0.032 | ----  | 11.971 |              | ----    |                     |                  |       |
| 6.954  | 2907     | 0.036 | 0.982 | 13.619 | 14:0 iso     | 1.07    | ECL deviates 0.000  | Reference -0.004 | OK    |
| 8.447  | 20639    | 0.040 | 0.964 | 14.623 | 15:0 iso     | 7.46    | ECL deviates 0.000  | Reference -0.004 | OK    |
| 8.588  | 28456    | 0.041 | 0.963 | 14.714 | 15:0 anteiso | 10.28   | ECL deviates 0.001  | Reference -0.003 | OK    |
| 10.081 | 55186    | 0.043 | 0.952 | 15.627 | 16:0 iso     | 19.72   | ECL deviates 0.000  | Reference -0.004 | OK    |
| 10.702 | 6567     | 0.043 | 0.949 | 15.998 | 16:0         | 2.34    | ECL deviates -0.002 | Reference -0.006 | OK    |
| 11.801 | 92022    | 0.046 | 0.946 | 16.631 | 17:0 iso     | 32.66   | ECL deviates 0.001  | Reference -0.003 | OK    |
| 11.961 | 45055    | 0.045 | 0.946 | 16.723 | 17:0 anteiso | 15.98   | ECL deviates 0.000  | Reference -0.004 | OK    |
| 13.558 | 25916    | 0.047 | 0.943 | 17.632 | 18:0 iso     | 9.17    | ECL deviates 0.000  | Reference -0.004 | OK    |
| 14.204 | 1402     | 0.045 | 0.943 | 17.998 | 18:0         | 0.50    | ECL deviates -0.002 | Reference -0.007 | OK    |
| 14.850 | 607      | 0.037 | ----  | 18.367 |              | ----    |                     |                  |       |
| 15.326 | 1155     | 0.047 | 0.942 | 18.638 | 19:0 iso     | 0.41    | ECL deviates 0.004  | Reference -0.001 | OK    |
| 15.485 | 1170     | 0.043 | 0.942 | 18.729 | 19:0 anteiso | 0.41    | ECL deviates -0.002 | Reference -0.007 | OK    |

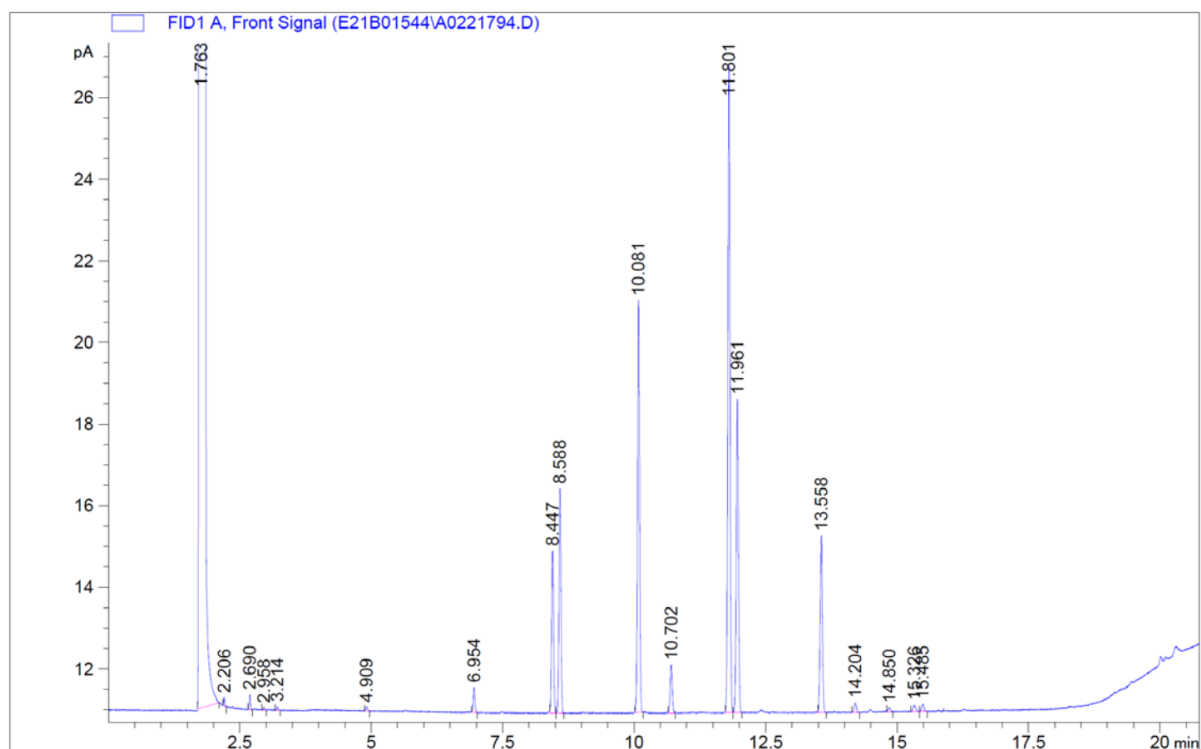

**Fig. S11.** Fatty acids analyses of *Rhodothermus profundus* strain PRI 2902<sup>T</sup>.

**Supplementary Tables.**

**Table S1.** Media 166, modified from Hjorleifsdottir et al., 2001 (9) (without proline). Grunnur base from medium 162 from Degryse et al., 1978 (10).

| <b>For 1L of liquid media:</b>  |        |
|---------------------------------|--------|
| NaCl                            | 10 g   |
| K <sub>2</sub> HPO <sub>4</sub> | 0.3 g  |
| Yeast extract                   | 1 g    |
| Peptone                         | 1 g    |
| Tryptone                        | 1 g    |
| Glucose                         | 0.5 g  |
| Amidon (starch)                 | 0.5 g  |
| Na-pyruvate                     | 0.6 g  |
| Na <sub>2</sub> CO <sub>3</sub> | 0.18 g |
| Base "Grunnur"                  | 100 mL |
| Hot tap water                   | 900 mL |
| pH adjusted to 7-7.5            |        |

| <b>Grunnur (for 1L):</b>                  |         |
|-------------------------------------------|---------|
| Titriplex I (nitrilotriacetic acid)       | 1.32 g  |
| CaSO <sub>4</sub> x 2H <sub>2</sub> O     | 0.4 g   |
| MgCl <sub>2</sub> x 6H <sub>2</sub> O     | 2.0 g   |
| Trace elements (Wolfe's mineral solution) | 5 ml    |
| Ironcitrate                               | 5 ml    |
| H <sub>2</sub> O                          | 1000 ml |
| pH adjusted to 7.2                        |         |

| <b>Ironcitrate (for 1L):</b>                |        |
|---------------------------------------------|--------|
| Na <sub>3</sub> citrate x 2H <sub>2</sub> O | 2.94 g |
| FeCl <sub>3</sub> x 6H <sub>2</sub> O       | 2.7 g  |

**Table S2.** Annotated genes from genome of strain ISCAR-7401<sup>T</sup> (see Excel file).

**Table S3.** Characteristics that differentiate the characterized strains of *Rhodothermus bifroesti*. 1, *Rhodothermus bifroesti* sp. nov. strain ISCAR-7401<sup>T</sup>; 2, Strains ISCAR-7397; 3, Strains ISCAR-7399; 4, Strains ISCAR-7403. Data were obtained in the present study. All strains are aerobic, stain Gram-negative, produce pinkish, translucent colonies, grew optimally at 70°C, and are oxidase- and catalase-negative. All strains could grow without NaCl (w/v) and showed growth on D-galactose, glucose, D-lactose, D-mannose, D-raffinose, D-rhamnose, D-sucrose, pyruvate, L-asparagine, L-aspartate, and L-glutamine. None exhibited growth on D-fructose, acetate, citrate, L-malic acid, L-alanine, L-arginine, L-proline, L-serine, L-threonine, and L-valine. All the strains were resistant to rifampicin, kanamycin, and streptomycin and were sensitive to gentamicin. W, weak growth.

|                                                                  | 1   | 2   | 3     | 4     |
|------------------------------------------------------------------|-----|-----|-------|-------|
| Growth at 6% NaCl (w/v)                                          | -   | -   | -     | w     |
| Growth at pH 9.5                                                 | w   | +   | +     | +     |
| Utilization of D-maltose, L-glutamate                            | +   | +   | +     | -     |
| Utilization of L-asparagine, L-glutamine                         | +   | +   | w     | w     |
| 16S rRNA gene similarity (%) with strain ISCAR-7401 <sup>T</sup> | 100 | 100 | 99.76 | 99.68 |

## Supplementary references.

1. Miller LT. Single derivatization method for routine analysis of bacterial whole-cell fatty acid methyl esters, including hydroxy acids. *Journal of Clinical Microbiology*. 1982;16(3):584–6. doi: 10.1128/jcm.16.3.584-586.1982
2. Kuykendall LD, Roy MA, O'Neill JJ, Devine TE. Fatty acids, antibiotic resistance, and deoxyribonucleic acid homology groups of *Bradyrhizobium japonicum*. *International Journal of Systematic Bacteriology*. 1988;38(4):358–61. doi: 10.1099/00207713-38-4-358
3. Moss CW, Lambert-Fair MA. Location of double bonds in monounsaturated fatty acids of *Campylobacter cryaerophila* with dimethyl disulfide derivatives and combined gas chromatography-mass spectrometry. *Journal of Clinical Microbiology*. 1989;27(7):1467–70. doi: 10.1128/jcm.27.7.1467-1470.1989
4. Harvey DJ. Picolinyl esters as derivatives for the structural determination of long chain branched and unsaturated fatty acids. *Biological Mass Spectrometry*. 1982;9(1):33–8. doi: 10.1002/bms.1200090107
5. Spitzer V. Structure analysis of fatty acids by gas chromatography - Low resolution electron impact mass spectrometry of their 4,4-dimethyloxazoline derivatives - A review. *Progress in Lipid Research*. 1996;35(4):387–408. doi: 10.1016/S0163-7827(96)00011-2
6. Yu QT, Liu BN, Zhang JY, Huang ZH. Location of methyl branchings in fatty acids: Fatty acids in uropygial secretion of Shanghai Duck by GC-MS of 4,4-dimethyloxazoline derivatives. *Lipids*. 1988;23:804–810. doi: 10.1007/BF02536225
7. Bligh, E.G. and Dyer WJ. A rapid method of total lipid extraction and purification. *Canadian Journal of Biochemistry and Physiology*. 1959;37(8):911–7. doi: 10.1139/o59-099
8. Tindall BJ, Sikorski J, Smibert RA, Krieg NR. Phenotypic Characterization and the Principles of Comparative Systematics. In: *Methods for General and Molecular Microbiology*. 2007. doi: 10.1128/9781555817497.ch15
9. Hjorleifsdottir S, Skirnisdottir S, Hreggvidsson GO, Holst O, Kristjansson JK. Species composition of cultivated and noncultivated bacteria from short filaments in an icelandic hot spring at 88°C. *Microbial Ecology*. 2001;42(2):117–25. doi: 10.1007/s002480000110
10. Degryse E, Glansdorff N, Piérard A. A comparative analysis of extreme thermophilic bacteria belonging to the genus *Thermus*. *Archives of Microbiology*. 1978;117:189–196. doi: 10.1007/BF00402307
